# Supplementary material for: Microbiome interactions shape host fitness
Source: PubMed Central journal article supplement — Proc Natl Acad Sci U S A. 2018 Dec 3;115(51):E11951–60. doi: 10.1073/pnas.1809349115 (PMC6304949; doi:10.1073/pnas.1809349115), 2018-12-03
Supplement: pnas.1809349115.sapp.pdf [file pnas.1809349115.sapp.pdf]

## Supplementary Information for

### Microbiome interactions shape host fitness

Alison L. Gould,<sup>1,2</sup> Vivian Zhang,<sup>1,2</sup> Lisa Lamberti,<sup>3,4</sup> Eric W. Jones,<sup>5</sup> Benjamin Obadia,<sup>1</sup> Nikolaos Korasidis,<sup>3</sup> Alex Gavryushkin,<sup>3,4,6</sup> Jean M. Carlson,<sup>5</sup> Niko Beerenwinkel,<sup>3,4</sup> William B. Ludington<sup>1,7\*</sup>

1. Dept Molecular & Cell Biology, Division of Genetics, Genomics & Development, Division of Immunology & Pathogenesis, UC Berkeley, Berkeley, CA 94720
2. equal contributors
3. Dept Biosystems Science & Engineering, ETH Zurich, 8092 Zurich, Switzerland
4. Swiss Institute of Bioinformatics, 4058 Basel, Switzerland
5. Complex Systems Group, Dept Physics, UC Santa Barbara, Santa Barbara, CA 93106
6. Dept Computer Science, University of Otago, Dunedin 9016, New Zealand
7. Dept Embryology, Carnegie Institution for Science, Baltimore, MD 21218

\*Lead contact: ludington@carnegiescience.edu

#### **This PDF file includes:**

Supplemental Materials and Methods  
Figs. S1 to S18  
Table S1-S5  
Math Supplement

#### **No other supplementary materials**

## Materials and Methods

**Fly stock maintenance:** *Wolbachia*-free *Drosophila melanogaster* Canton-S flies were reared on cornmeal-based medium (6.67% cornmeal, 2.7% active dry yeast, 1.6% sucrose, 0.75% sodium tartrate, 0.73% ethanol, 0.68% agar, 0.46% propionic acid, 0.09% methylparaben, 0.06% calcium chloride, and 0.01% molasses). Fly stocks were maintained at 25 °C, 60% humidity, and 12:12 h light:dark cycles. Fly stocks were tested for the presence of known RNA viruses by RT-PCR and were virus-free (44). Germ-free fly stocks were kept in sterile conditions over multiple generations to reduce heterogeneity due to parental nutrition derived from microbiome variability.

**Germ-free fly preparation:** *Wolbachia*-free and virus-free *Drosophila melanogaster* Canton-S flies reared on a cornmeal-based medium were transferred to embryo collection cages and allowed to acclimate in the cage for at least one day before egg collection. On the morning of egg collection, a yeast paste was added on a grape juice agar plate. Flies were left to lay eggs on this grape juice agar plate for 5-6 h. Eggs were then collected into a 400  $\mu\text{m}$  cell strainer. In a biosafety cabinet, fly eggs were rinsed twice in 10% bleach (0.6% sodium hypochlorite) for 2.5 min each, once in 70% ethanol for 30 s, and three times in sterile  $\text{dH}_2\text{O}$  for 10 s each. Approximately 50 eggs were transferred using a sterile cotton swab to individual vials containing sterile fly medium (10% filter-sterilized glucose, 5% autoclaved active dry yeast, 1.2% autoclaved agar, 0.42% filter sterilized propionic acid). The resulting adults were maintained germ-free for at least three generations to mitigate any parental effects.

**Bacteria strains:** Five unique species were identified in our laboratory flies (17): *Lactobacillus plantarum*, *L. brevis*, *Acetobacter pasteurianus*, *A. tropicalis*, and *A. orientalis*, which were then isolated from *D. melanogaster* flies in our lab and checked by standard Sanger sequencing the complete 16S region (see PCR for fly bacteria section).

To prepare the inoculum for flies, bacteria were grown overnight in MRS medium in a shaker set at 30 °C. The bacteria were resuspended at a concentration of  $10^8$  cells/mL in sterile phosphate-buffered saline (PBS) for fly gnotobiotic preparations (20) so that constant numbers of CFUs were inoculated per fly vial. The 32 combinations of the 5 bacterial strains were mixed using a Beckman Coulter Biomek NXP workstation to standardize the inoculum. Vials were swabbed to ensure correct bacterial species were present without contaminants.

**Adult gnotobiotic fly preparation:** Germ-free mated flies 5-7 days post-eclosion were sorted into 10% glucose, 5% active dry yeast medium inoculated with a defined mixture of bacteria. Flies thus treated have been shown to have less variation in physiology and gut morphology (24). Inoculating in the adult phase allowed us to separate developmental differences from effects on adult flies. Each vial contained a total of  $5 \times 10^6$  CFUs (50  $\mu\text{L}$  of  $10^8$  bacteria/mL in 1x PBS). Ten female and ten male flies were transferred into each vial. Gnotobiotic flies were transferred to freshly inoculated medium every 3 days for the duration of the concurrent lifespan-fecundity-development experiment (see following sections).

**For the bacterial ecology calculations** (Fig. 6), two different treatments were applied after an initial 10 days of inoculation where flies were inoculated as described in 'Adult gnotobiotic fly preparation.' Every three days the remaining live flies were transferred to fresh food vials inoculated with  $5 \times 10^6$  CFUs/vial (as with the initial inoculation) in order to reduce the effects of microbial interactions on the fly media. Vial swabs were performed to check that all inoculated species were still present on the third day. In the first treatment ( $n=24$  flies per bacterial treatment), flies were immediately subjected to bacterial load

quantification on the 10<sup>th</sup> day of inoculation (see 'Bacterial load counts' section). This experiment lets us evaluate the load and relative abundance of bacteria during the fly fitness experiment.

A second treatment was undertaken to measure the steady state of bacterial population sizes in the absence of new colonization. After the initial 10 days of inoculation, these flies were transferred daily to fresh germ-free food for 5 days before subsequent bacterial load quantification (Fig S6C,D).

**Check for contamination and correct colonization:** All fly work including media preparation and transfers to fresh food was performed in a tissue culture hood using sterile technique. Contamination was assessed by two methods. First, groups of 10 flies were crushed and plated to determine whether they were colonized. Correct colonization was determined by colony morphology on MRS and MYPL media and by 16S PCR followed by Sanger sequencing to confirm species identities. Whole fly DNA extracts were also checked by PCR using both 16S and *Wolbachia*-specific primers. We perform these tests every two weeks to maintain our gnotobiotic flies. During the fitness experiment, the correct colonization was checked by swabbing the old vials after adults were transferred to fresh media.

#### **PCR for fly bacteria**

We used PCR to test for correct bacterial association and to ensure that our flies remained *Wolbachia*-free. 16S universal primers to the V4 region of the rRNA gene were used to check for proper bacterial association (16S V4 Forward: 5'- GTG TGC CAG CMG CCG CGG TAA; 16S V4 Reverse: 5'- CCG GAC TAC HVG GGT WTC TAA T). PCR reaction mix and cycling parameters were as follows:

KAPA2G Robust HotStart Kit, 15uL reaction: 3uL 5X KAPA2G Buffer B; 0.3uL dNTP mix; 0.12uL KAPA2G; Robust HotStart DNA Polymerase ; 0.5uL 16S V4 Forward primer; 0.5uL 16S V4 Reverse primer ; 1uL template DNA ; 9.58uL dH<sub>2</sub>O.

Cycling Conditions: Initial denaturation: 98C – 45 seconds; 36 cycles: 98C – 15 s, 58C – 15 s, 72C – 15 s; Final Extension: 72C – 5 min; Hold at 4C.

*Wolbachia*-specific primers were used to check for infection every month (Wsp 81F: 5'-TGG TCC AAT AAG TGA TGA AGA AAC; Wsp 691R: 5'-AAA AAT TAA ACG CTA CTC CA). The same reaction mix and cycling parameters were used with the exception that denaturation, annealing, and polymerization steps were all extended to 1 minute each.

Standard Sanger sequencing was performed to validate contamination results.

**Concurrent lifespan assay, fecundity (pupae counts), fly development:** We measured all host fitness phenotypes concurrently in mixed sex populations in order to mimic more natural conditions. To measure the lifespan of flies on each combination of bacteria, we recorded the number of flies living and number of flies dead daily until the entire population was dead. Dead flies were removed as the vials were flipped. Average daily female fecundity was assessed by counting the total number of pupae in each vial after the adults were flipped to a fresh vial. In tests, we found that greater than 99% of pupae eclosed into adults and therefore used pupae counts as a proxy for adults. Total fecundity was calculated as the sum of all daily fecundity counts for a given vial of adult flies. Due to the variable development times involved, vials were monitored daily for 14 days after removing the adults. To determine development times, we counted the day when the first adult emerged from each vial. We chose this metric because adults were housed in the same vial for 3 days and therefore the start of development was not synchronized.

**Development Assays:** In the experiments presented in Fig. S10, development times were assessed for each egg introduced to the vial. Eggs were first dechorionated and sterilized as described in *Germ-Free Fly Preparation* above. Eggs were then suspended in 1x PBS with 0.1% TritonX to facilitate pipetting of

the eggs. Roughly 30 eggs (and always >20 eggs) were pipetted into the recipient vial. Timing of pupation and eclosion in vials in which flies had previously developed were assayed at 1-day intervals for non-heat-killed (blue dots) and heat-killed (red dots) preparations. For the germ-free eggs inoculated with fresh bacteria (Fig. S10 black points), development timing was assessed at ~3-h intervals.

**Bacterial load counts from flies:** To assess the number of bacterial CFUs per fly (Figs. 3B, S6), flies were shaken in 70% ethanol for 5 s, rinsed in ddH<sub>2</sub>O for 5 s, and put into the well of a 96-well plate containing 100  $\mu$ L PBS and 80  $\mu$ L 0.5 mm glass beads (Biospec). Plates were heat sealed with aluminum sealing film (E&K Scientific), then bead beaten for 60 s at maximum speed in a MiniBeadBeater-8 (Biospec) converted to hold a 96-well plate using a custom-built attachment. Plates were then pinned with a 96-pin replicator (Boekel) in three technical replicates per fly onto selective media that allowed us to visually distinguish each bacterial species. Selective media were: MRS (Difco) with X-gal, which grows only *Lp* (yellowish-white colonies) and *Lb* (blue colonies); MYPL with 5 mg/L tetracycline, which grows only *Ap* (rounder, thicker, browner colonies) and *Ao* (flat colonies with ruffled borders); and MYPL with 50 mg/L gentamycin, which grows only *At* and *Ao*. Plates were grown at 30°C. A standard curve was constructed for each strain to calculate CFUs from the observed bacterial counts (Fig. S18).

**Bacterial load counts from food:** To assess the bacterial load in fly food (Fig S9), a similar protocol was followed as for the whole flies. A 96-well plate containing 100  $\mu$ L PBS and 80  $\mu$ L 0.5 mm glass beads (Biospec) was prepared. This plate was placed on an analytical balance. A small metal spatula was then dipped into the fly food to gather ~10 mg of food. The food was scraped into a well of the plate and weighed. The spatula was sterilized in 70% ethanol and a flame between samples. Three samples were taken from separate regions of each fly vial and two separate biological replicates were made for each bacterial treatment. The plate was then heat sealed, bead beaten for 60 s, replica pinned onto selective media, and scored (as was done in making the bacterial counts from flies).

**In vitro passaging assay:** Each bacterial combination was made in 1x PBS and 5  $\mu$ L of 10<sup>7</sup> CFUs/mL was inoculated in triplicate into three rich media in 96 well plates: MRS, MYPL, and YG. YG is 50% diluted fly food without agar: 5% glucose, 2.5% boiled baker's yeast, and 0.21% propionic acid. The yeast sediment has been removed by centrifugation. Culture volume was 150  $\mu$ L per well. The cultures were allowed to grow for 48 hours at 25°C under constant shaking. Cells were then passaged to fresh media in 96 well plates by diluting each well 10 fold and then replica pinning (Boekel 96 pin tool) to the fresh plate, which delivers ~2 $\mu$ L. A total of three passages were made, and the final passage was replica pinned onto selective agar, allowing discrimination of the 5 species' presence/absence. Selective agar were the following: MRS + Xgal grows *Lp* and *Lb* and *Lb* turns blue while *Lp* is yellowish white. MYPL + 10  $\mu$ g/mL gentamycin grows *At* and *Ao*. MYPL + 5  $\mu$ g/mL tetracycline grows *Ap* and *Ao*. *Ao*'s colony morphology is distinctive and can be distinguished by eye.

**Fly activity assay:** Gnotobiotic flies were prepared as previously described. Ten females and ten male flies were sorted into each vial. Each vial was flipped every 3 days into medium inoculated with the required bacterial mixture. After the 9<sup>th</sup> day (the third flip), gnotobiotic flies were flipped into a vial containing sterile gnotobiotic fly medium (10% glucose, 5% yeast, 1.2% agar, and 0.42% propionic acid). These vials were placed into the LAM25 (Locomotor Activity Monitor; Trikinetics) kept at 25 °C, 60% humidity, and 12:12 h light:dark cycles and monitored for 7 days.

**Fitness calculations:** We estimated fitness for each bacterial treatment using a Leslie matrix (1,000 replicates per treatment). For each replicate Leslie matrix, we randomly sampled from the experimental replicates of development time, daily fecundity and lifespan. Female fecundity was counted as zero until



the day of adult emergence. Thereafter, the fecundity was filled from the data by random sampling of the 5 replicate vials for each time point.

The diagonal was filled with '1's corresponding to the development time. After development, the adult survival data were used by randomly sampling the 5 adult survival-probability replicates for each day. The remaining values in the matrix were zeros. We then calculated the dominant eigenvalue of the matrix for each of the 1,000 replicate samplings, yielding a range of fitness estimates. This fitness value,  $\lambda$ , corresponds to the daily fold expansion of the population,  $N_{t+1} = \lambda N_t$ , under ideal conditions.

**Statistical analyses:** All statistics were calculated using R (v.3.3.3) (28) unless otherwise noted. Survival data average curves were calculated as the cumulative proportion of the population that died over time. A 3-parameter Gompertz function with an upper limit of 1 was selected using the 'drc' package(45) in R,  $N(t) = N_0 e^{-e^{-a(t-b)}}$ , where  $N(t)$  is the proportion of the population surviving as a function of time (Fig. S1). Model selection using the Akaike information criterion was applied to pick the best function. The same approach was applied to fit the daily fecundity data (Fig. S5), resulting in a 3-parameter Gompertz,  $f(t) = f_0 e^{-e^{-a(t-b)}}$ .

The Shapiro-Wilk test was used to determine if data were consistent with a normal distribution. For correlation tests, Pearson correlations were used where the data were consistent with a normal distribution. Spearman correlations were used where the data were inconsistent with a normal distribution.

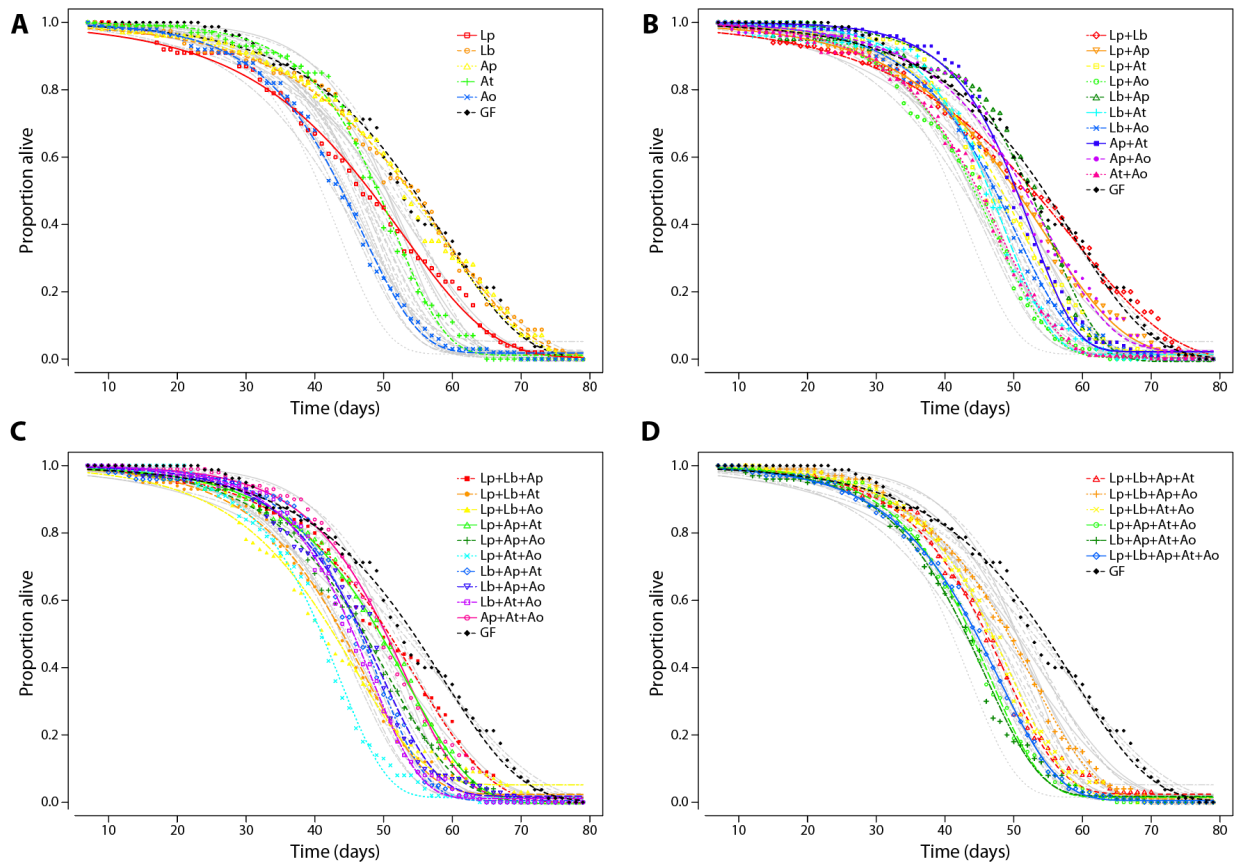

**Figure S1. Curve fits to raw lifespan data aggregated from all 5 experimental replicates for each bacterial combination.** Curve fits to a 3-parameter Gompertz distribution with an upper limit at one are depicted (see Methods). Bacterial combinations are grouped by the number of species. **(A)** Single species and germ-free flies. **(B)** Species pairs and germ-free flies. **(C)** Species trios and germ-free flies. **(D)** Species 4-way combinations, 5-way combination, and germ-free flies. All curves are displayed in grayscale as a reference.

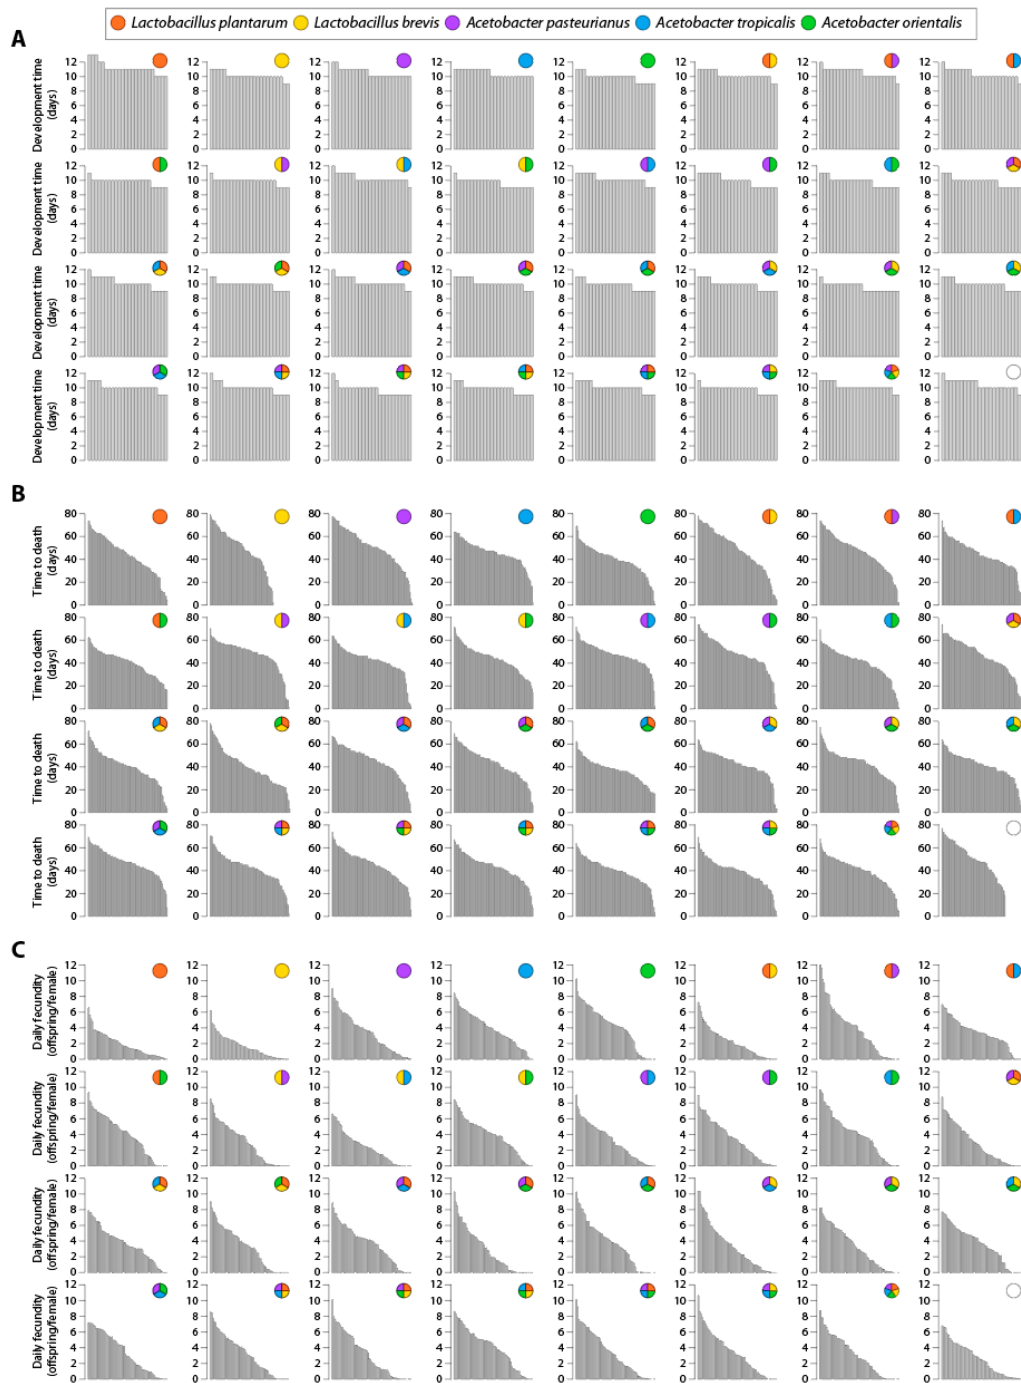

**Figure S2. Raw data from development rate, fecundity, and time to death.** (a) Raw data for development time by microbial treatment. Each bar within a treatment is the fastest-developing fly within a vial. (b) Raw data for time to death by microbial treatment. Each bar represents the lifespan of an individual fly. Male and female flies are aggregated because no statistically significant difference was detected between male and female lifespans in these mixed-sex experiments. (c) Raw data for fecundity per day per female by treatment. Each bar represents the total fecundity measured from a single fly vial normalized to the number of adult female flies.

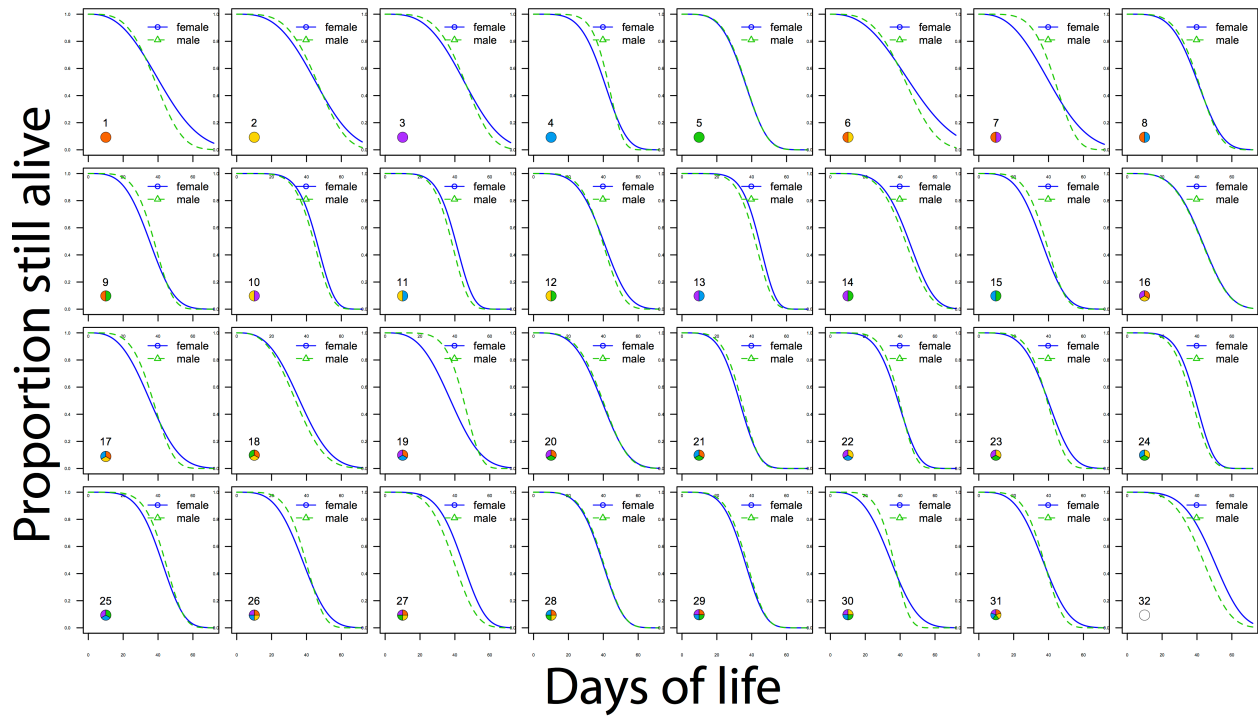

**Figure S3. Lifespan differences between males and females are not significant overall.** For each bacterial combination, a separate Gompertz curve (see Methods) was fit to male and female survival. No consistent difference is apparent overall, however, individual combinations may have differences if they were evaluated separately from the group.

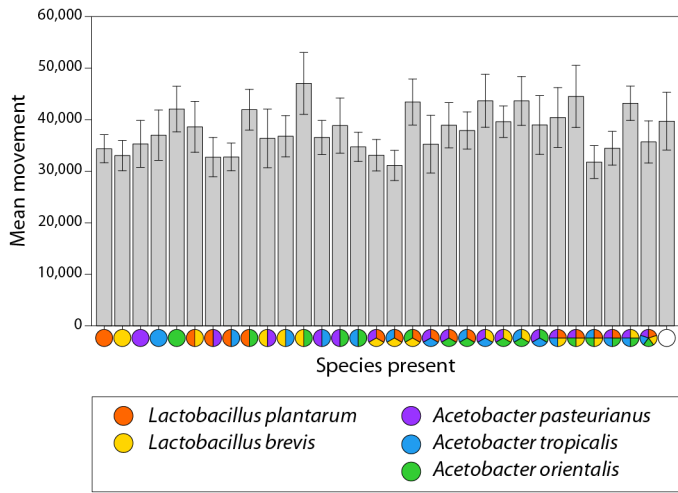

**Figure S4. Average fly activity is unrelated to the fitness phenotypes.** Fly movement is associated with overall metabolism, including food intake and energy expenditure. To search for behavior changes underlying the physiological differences in our bacterial treatments, we examined changes in fly motility for each bacterial treatment ( $n=32$ ) in 5 replicate trials ( $n=20$  flies per trial) using the LAMS (Trikinetics) population-based motility assay. Error bars show standard error of the mean. Trials were carried out for 7 days. Flies were flipped into fresh vials and placed in the activity-monitoring device. The first 24 h of data were removed to allow for fly acclimation to the new vial. Overall, we found no significant differences between bacterial combinations nor were there any correlations in the mean values with the other physiological data.

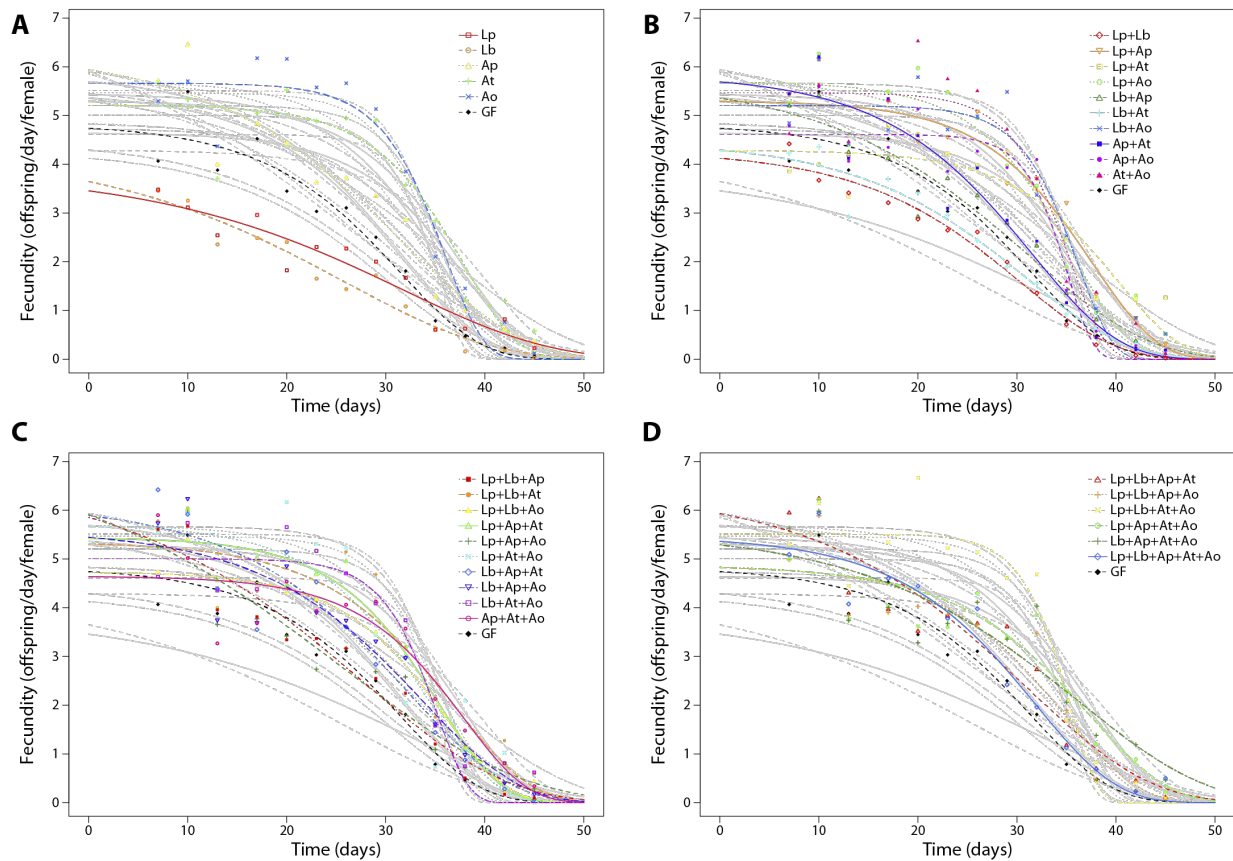

**Figure S5. Curve fits to raw fecundity data aggregated from all 5 experimental replicates for each bacterial combination.** Curve fits to a 3-parameter Gompertz distribution are depicted (see Methods). Bacterial combinations are grouped by the number of species. **(A)** Single species and germ-free flies. **(B)** Species pairs and germ-free flies. **(C)** Species trios and germ-free flies. **(D)** Species 4-way combinations, 5-way combination, and germ-free flies. All grayscale curves are kept as a reference.

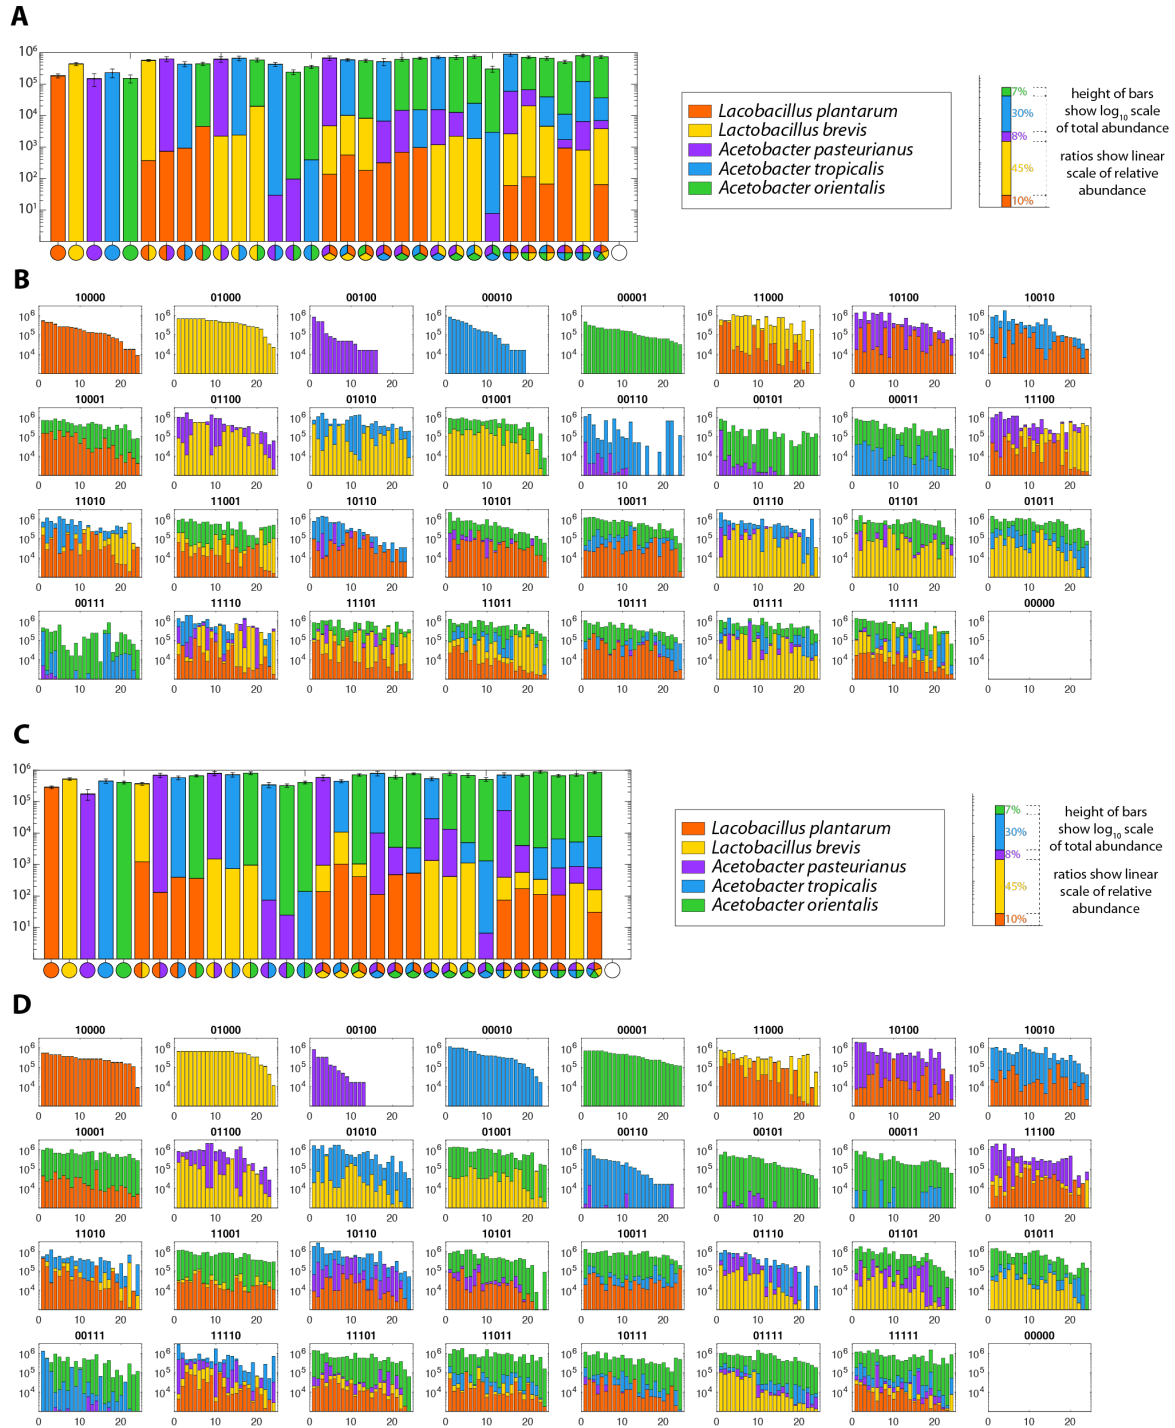

**Figure S6. Raw bacterial abundance counts (CFUs) for each fly with each bacterial combination.** Y-axes are CFUs on a  $\log_{10}$  scale. The relative abundance of individual species is indicated by ratios on a linear scale. **(A)** Average CFUs for each bacterial combination where flies were fed defined bacteria continuously for 10 days and then crushed and CFUs enumerated. **(B)** Individual fly data for the same experiment represented in **A**. X-axes indicate the 24 individual flies. **(C)** Average CFUs for each bacterial combination. The experiment is identical to **A** with one difference: after the initial 10 days of inoculation, flies were transferred daily to fresh food for 5 days. Note that there are subtle differences between **A** and **C**. **(D)** Individual fly data for the same experiment represented in **C**. X-axes indicate the 24 individual flies.

We note that the limit of detection (~1,000-10,000 CFUs) can mask low-abundance colonization. We performed additional CFU enumeration of individual bacterial species in individual flies with a limit of detection of 10 CFUs. This experiment showed that flies which appeared uncolonized by one or more bacterial species, were likely colonized at levels below the limit of detection after five days of daily transfer to germ free food (12/12 flies colonized with 5 species had all 5 species; 12/12 flies colonized with *Ap* had *Ap*; 12/12 flies colonized with *Ap* + *Ao* had both species; 11/12 flies colonized with *Ap* + *At* were colonized by both species while one was missing *Ap*). These results are consistent with our previous results (17) and indicate that flies are stably colonized in our experimental conditions (Fig. 3B).



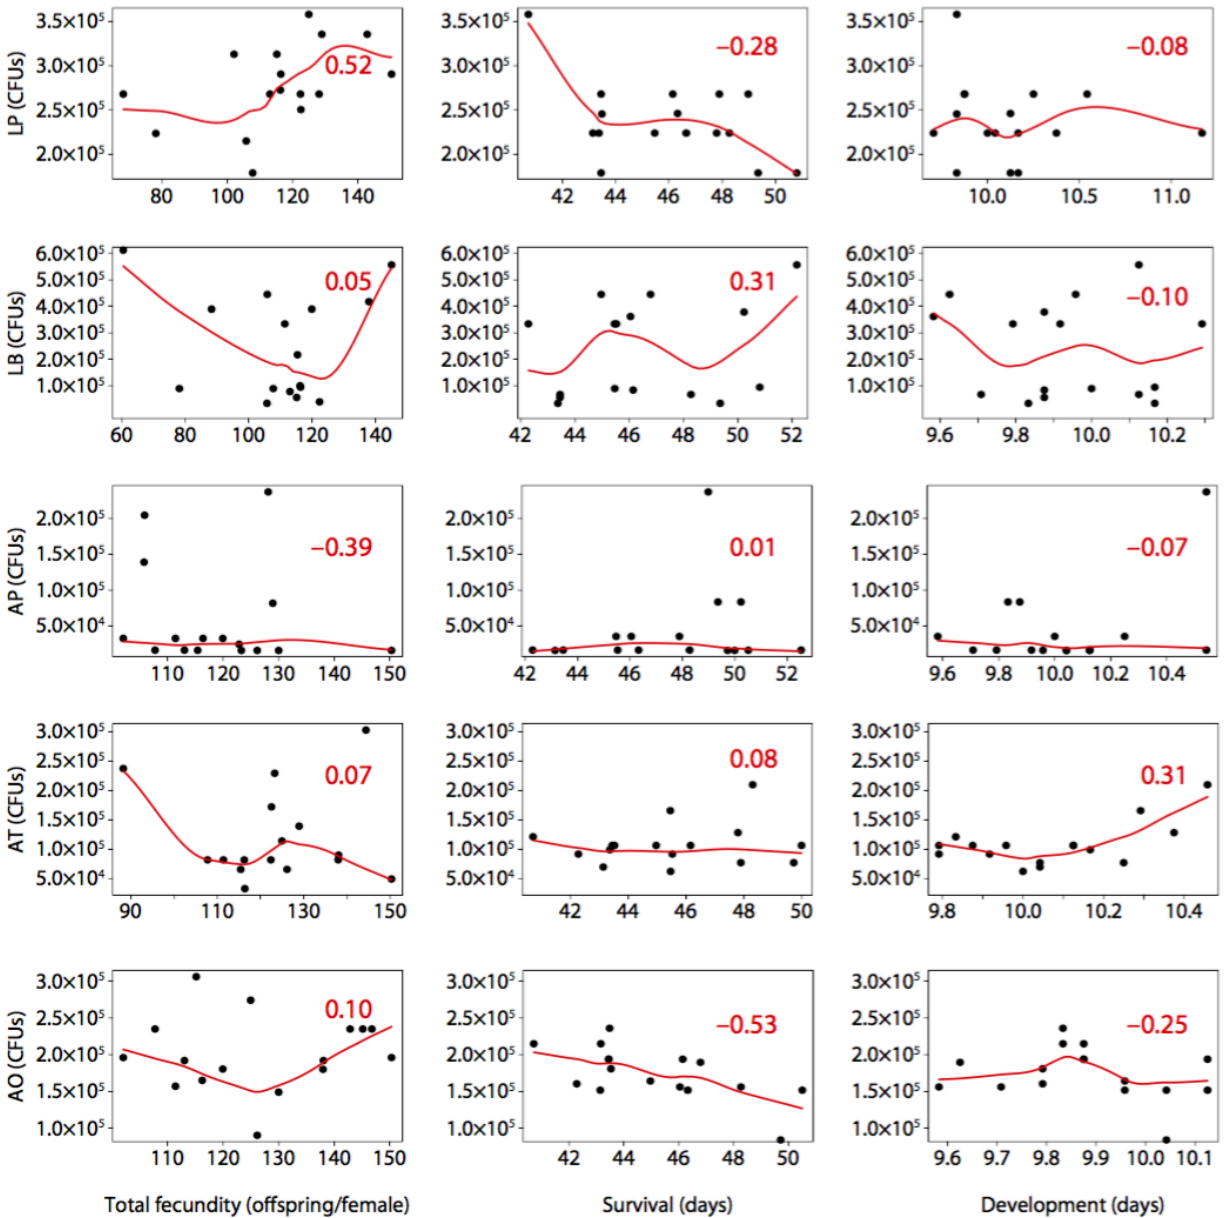

### CFUs species fitness correlations plots

|                         | Lp          |             | Lb    |      | Ap    |      | At   |      | Ao           |             |
|-------------------------|-------------|-------------|-------|------|-------|------|------|------|--------------|-------------|
|                         | r           | p           | r     | p    | r     | p    | r    | p    | r            | p           |
| <b>TotalFecundity</b>   | <b>0.52</b> | <b>0.04</b> | 0.05  | 0.86 | -0.39 | 0.13 | 0.07 | 0.80 | 0.10         | 0.71        |
| <b>TimeDeath</b>        | -0.28       | 0.30        | 0.31  | 0.25 | 0.01  | 0.96 | 0.08 | 0.77 | <b>-0.53</b> | <b>0.03</b> |
| <b>Develop</b>          | -0.08       | 0.78        | -0.10 | 0.71 | -0.07 | 0.80 | 0.31 | 0.24 | -0.25        | 0.35        |
| <b>C.V. TotalFecund</b> | -0.21       | 0.42        | -0.18 | 0.51 | -0.22 | 0.41 | 0.31 | 0.24 | 0.47         | 0.07        |
| <b>C.V. TimeDeath</b>   | 0.46        | 0.08        | 0.31  | 0.25 | 0.14  | 0.59 | 0.08 | 0.77 | -0.43        | 0.10        |
| <b>C.V. Develop</b>     | 0.14        | 0.60        | 0.35  | 0.19 | 0.14  | 0.61 | 0.34 | 0.20 | 0.08         | 0.77        |

**Figure S7. Fly phenotype correlations with individual bacterial species abundances.** Phenotype data from Fig. 2. CFU data from Fig. S6. P-values adjusted for multiple comparisons using Tukey's correction. Table shows Spearman correlations and p-values for each comparison. Coefficient of variation (C.V.) correlations are plotted in Fig. S8.

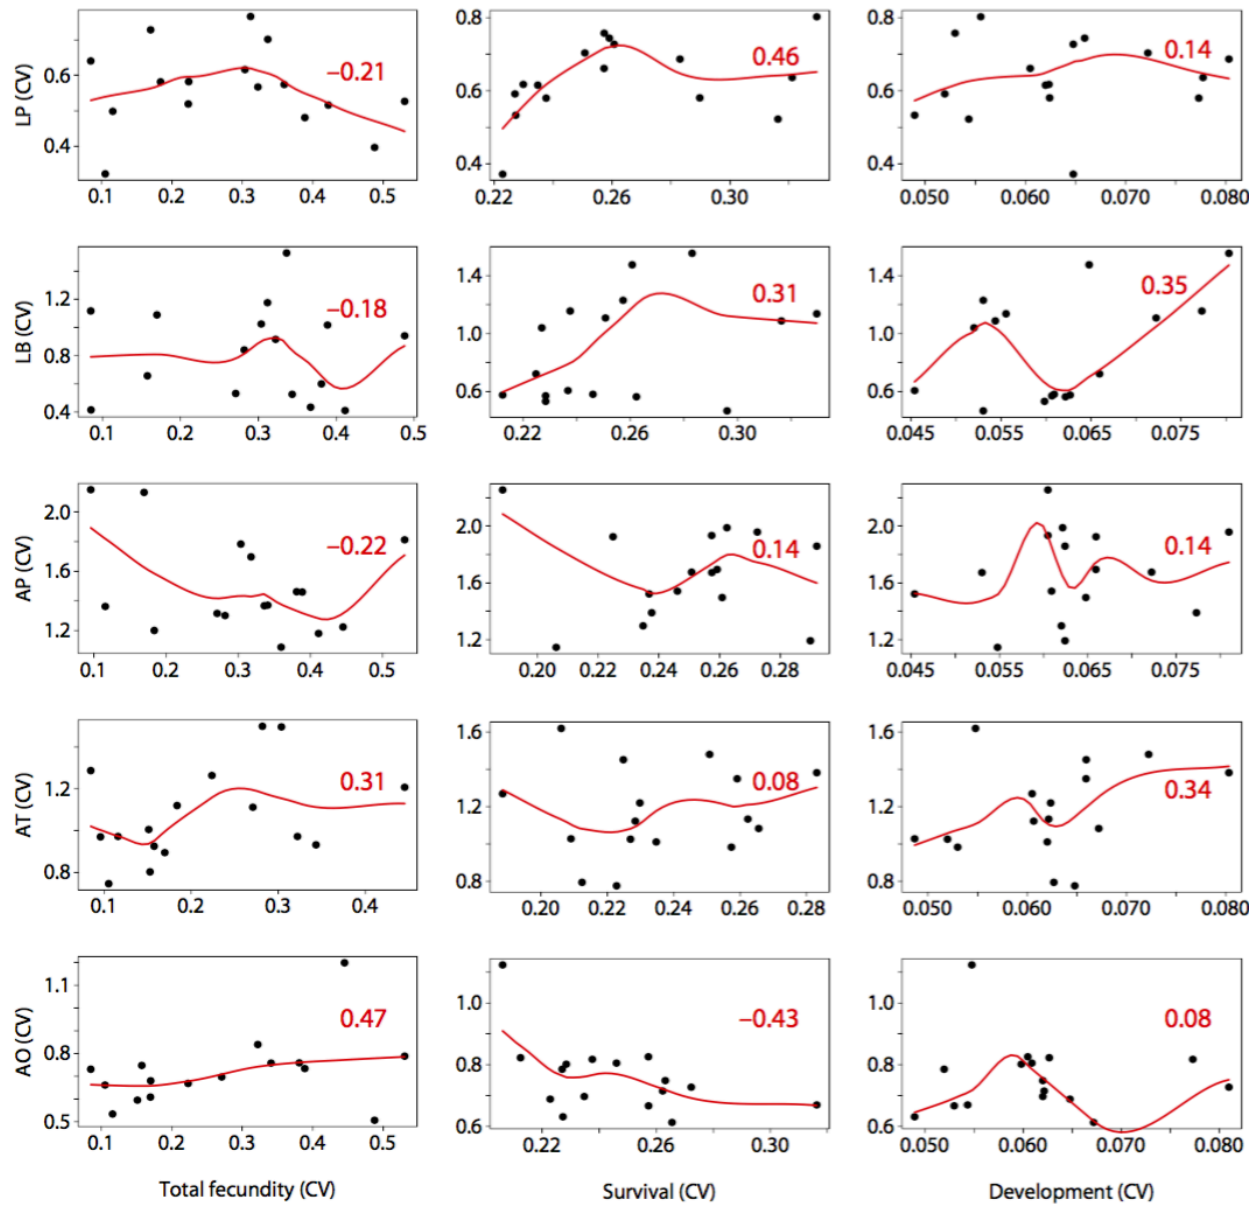

**Figure S8. Correlation plots between the coefficient of variation for fly phenotypes and individual bacterial species abundances.** None of the correlations are statistically significant (see Table in Fig. S7).

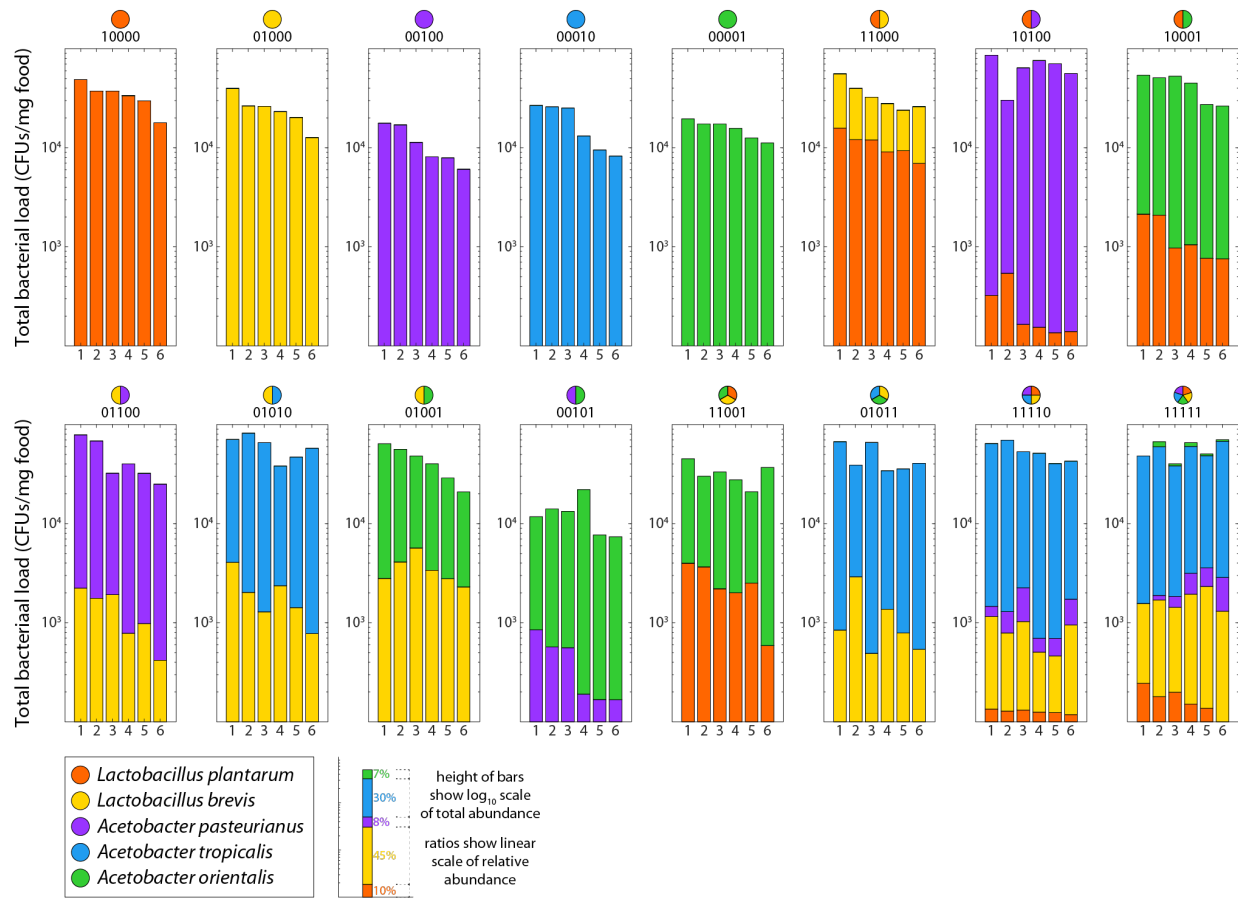

**Figure S9. Raw bacterial abundance counts (CFUs) for fly food treatments with 16 selected bacterial combinations.** X-axes indicate individual food samples 1 to 6. For each combination, the first three samples are from the first biological replicate, and the last three are from the second biological replicate. Y-axes are total CFUs on a  $\log_{10}$  scale. The relative abundance of individual species is indicated by ratios on a linear scale.

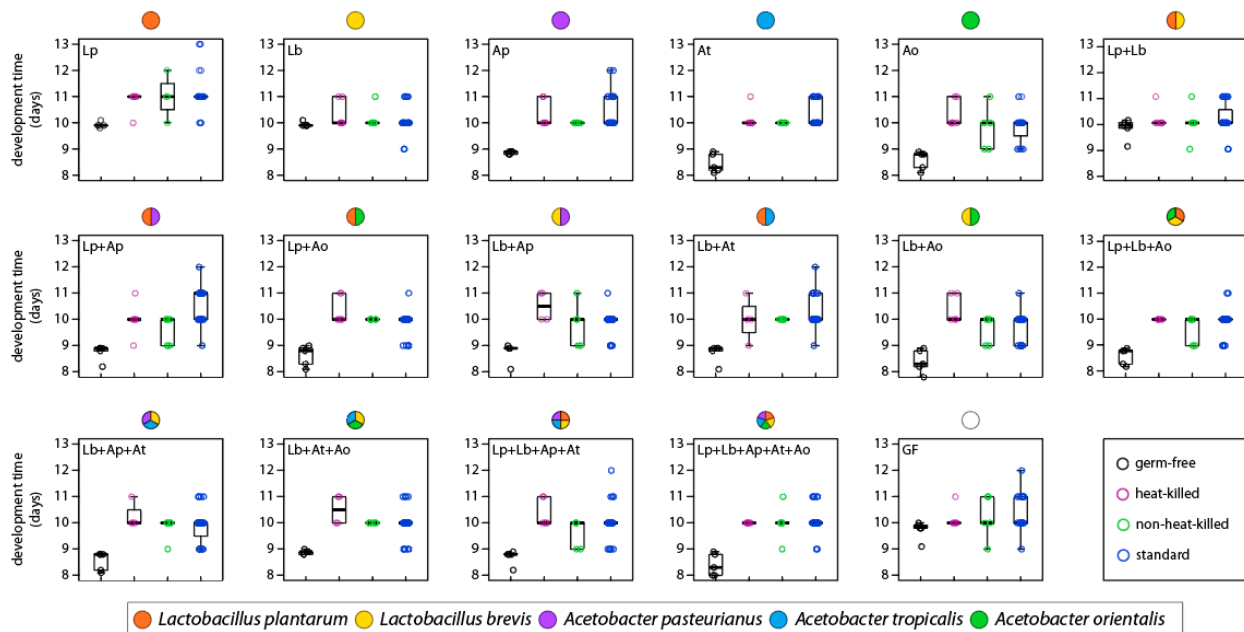

**Figure S10. Parental effects and live bacteria influence offspring developmental pace.** Sixteen microbial combinations and germ-free flies (indicated in upper left corners of boxes) were tested for their impacts on development time (number of days from embryo laid to adult emergence from pupal case). In the original experiments, the developmental time was measured from embryos that were directly laid by females continuously inoculated with their bacterial combination in the fitness experiment (blue data points in this figure; see also Fig. 1A, 2C). To test the role of parental effects, we experimentally varied the source of the embryos as well as the bacterial treatment. For all new treatments here (black, purple, and green data points), embryos were collected and dechorionated using 10% bleach, washed in 70% ethanol, and pipetted onto food in PBS with 0.1% Triton X detergent to prevent eggs sticking to one another (see Methods). Black points show data for  $n=20$  embryos taken from germ-free mothers before placing in fresh inoculated vials. Green points show data where colonized vials (with flies and bacteria) were emptied of all their flies (and larvae) and then  $n=20$  germ-free eggs were introduced. No significant differences were detected in development between the original fitness experiment and this treatment (paired sample t-test,  $p>0.18$ ,  $n=500$ ). Purple points indicate development in vials that were heat-killed at  $60^{\circ}\text{C}$  for 1 hour in a humid chamber to prevent drying (and tested for sterility) prior to the introduction of germ-free eggs. This treatment significantly increased the development time by 8 hours (paired sample t-test,  $p<0.005$ ,  $n=178$ ; see main text Fig. 3F). Finally, we tested whether bacteria deplete the food. Indeed, the fastest development times were for eggs introduced to fresh vials inoculated with bacteria but without previous fly occupation. In this treatment (black dots), there was very little variation between treatments except that flies lacking all *Acetobacter* species (Lp, Lb, Lp+Lb, germ-free) were delayed by 1 to 2 days with respect to their cohort, indicating that *Acetobacters* improve development most on fresh food. Box and whisker plots: box shows 25<sup>th</sup> to 75<sup>th</sup> percentile. Thick bar shows median. Whiskers extend to 1.5x the interquartile range. All data points are also shown with each box. The time resolution for these experiments is 1 day.

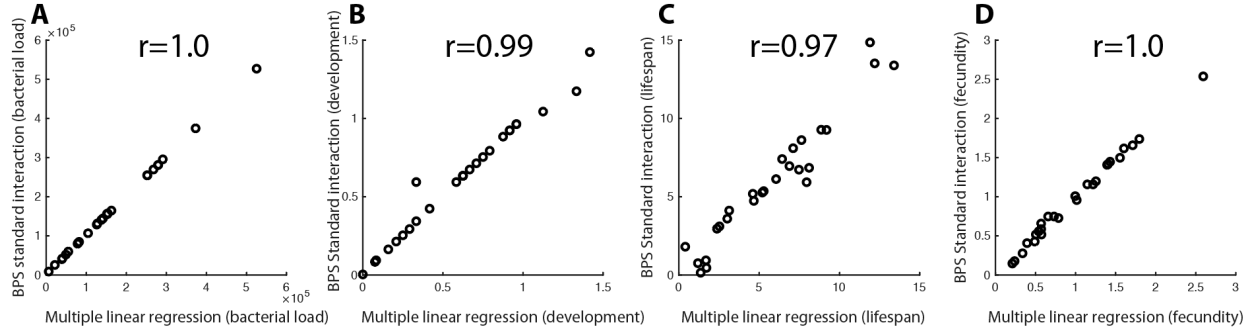

**Figure S11. The BPS direct calculations of ‘standard interactions’ are highly correlated with multivariate linear regression least squares fitting of interaction coefficients.** (A) CFUs in units of colony forming units ( $r^2=0.99$ ,  $p<10^{-30}$ ,  $n=26$ ), (B) Development time in units of days ( $r^2=0.97$ ,  $p<10^{-19}$ ,  $n=26$ ), (C) Lifespan in units of days ( $r^2=0.93$ ,  $p<10^{-14}$ ,  $n=26$ ), and (D) Fecundity in units of viable offspring per female per day ( $r^2=0.99$ ,  $p<10^{-26}$ ,  $n=26$ ).

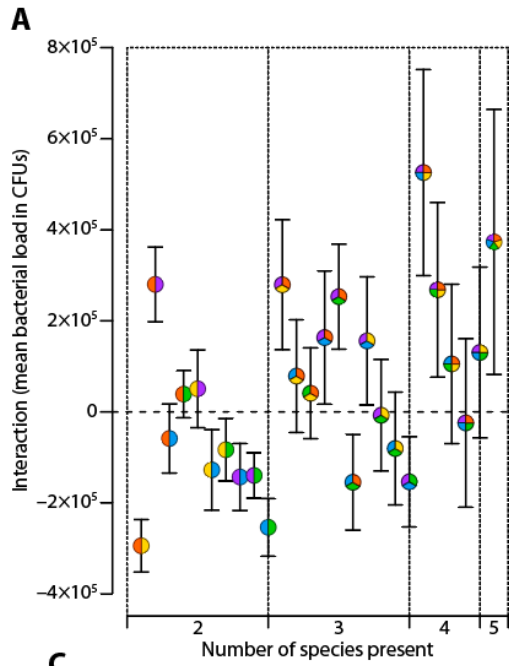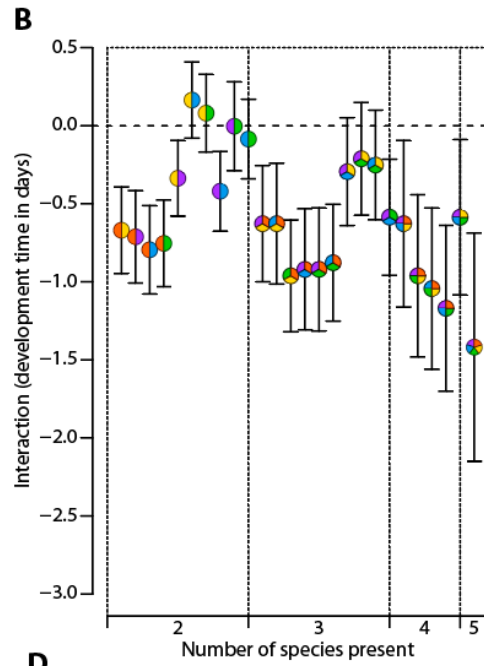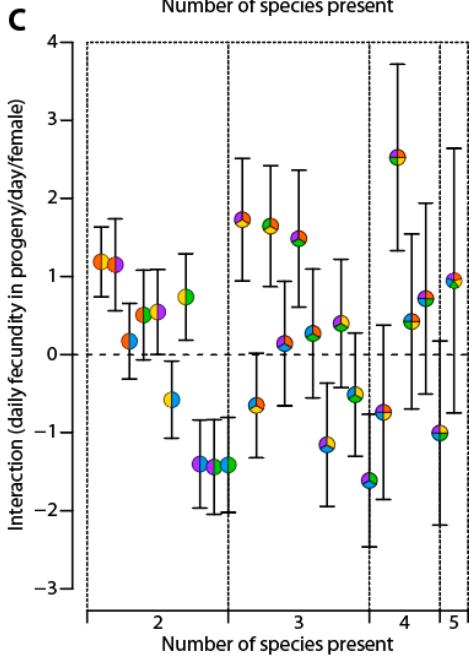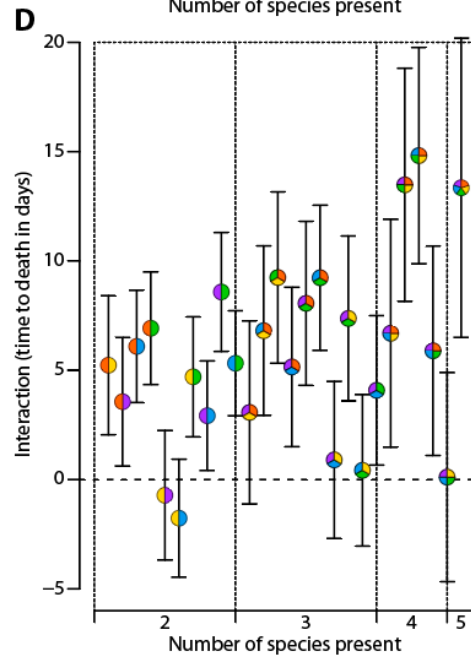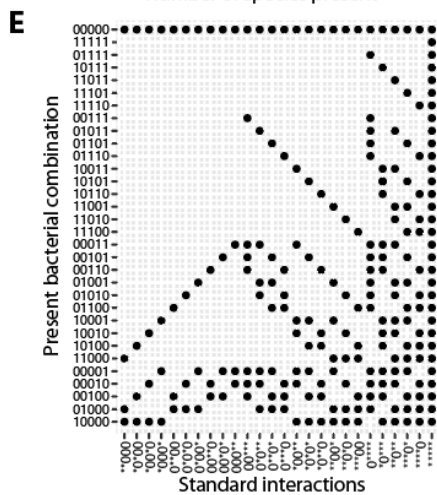

- *Lactobacillus plantarum*
- *Lactobacillus brevis*
- *Acetobacter pasteurianus*
- *Acetobacter tropicalis*
- *Acetobacter orientalis*

**Figure S12. Standard interactions calculated for each phenotype in Fig. 2A,C,E,G.** For all four phenotypes ((**A**) bacterial load, (**B**) development time, (**C**) fecundity, (**D**) lifespan) we computed the same 26 standard interactions. In the plots we separated interactions by the number of bacterial species involved (x-axis). The different bacterial combinations are expressed in colors. (**E**) The combinations summed together to calculate the interactions are indicated by black dots. For instance, the interaction between LP and LB, indicated by \*\*000 is calculated by combining the phenotype scores for 10000, 01000, 11000, and 00000. The 5-way interaction involves all combinations. As general trends, we observe that the same interactions decrease for development time while they increase for time to death, when the diversity of the bacterial species in the microbiome increases (see Fig. S13). See also T-polynomials (Math Supplement). Error bars are the propagated standard error from the raw phenotypes.

Figure S13

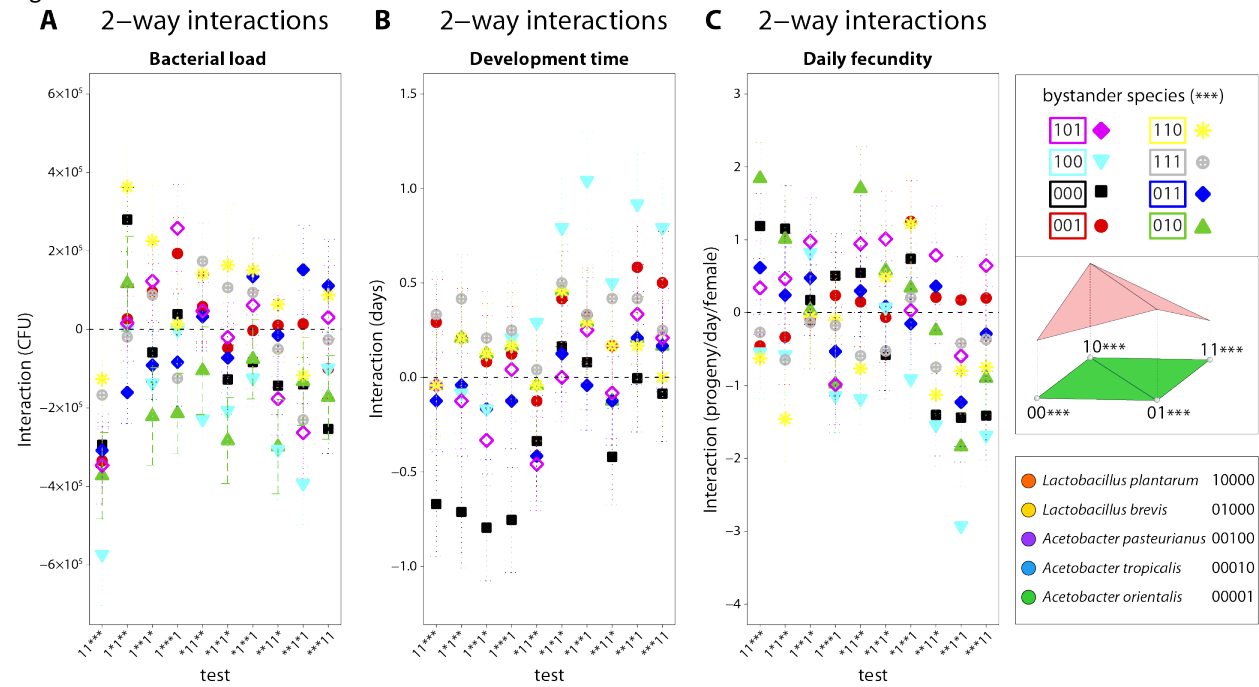

**D 3-way bacterial interactions**

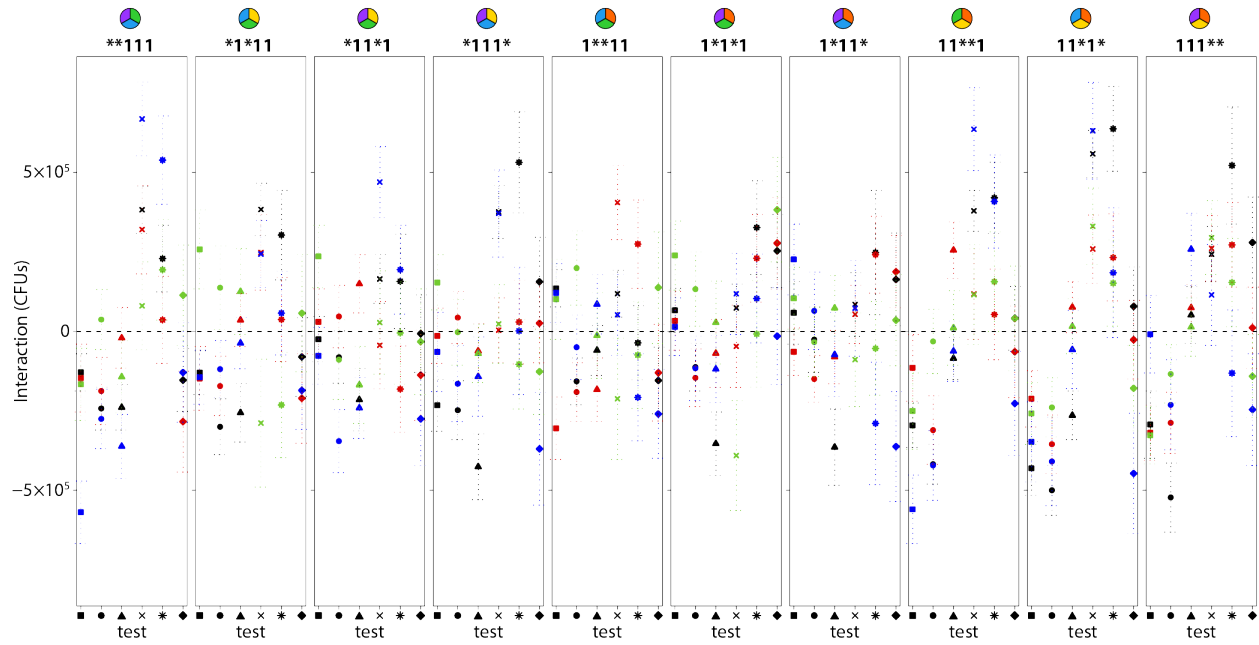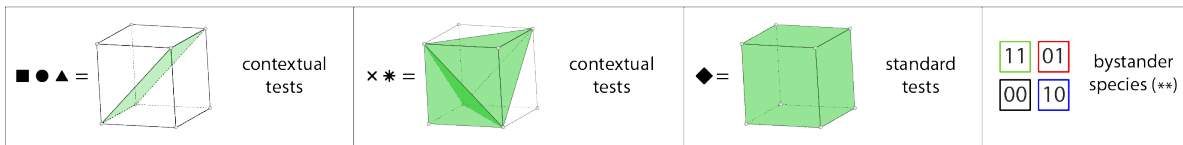



### E 3-way bacterial interactions

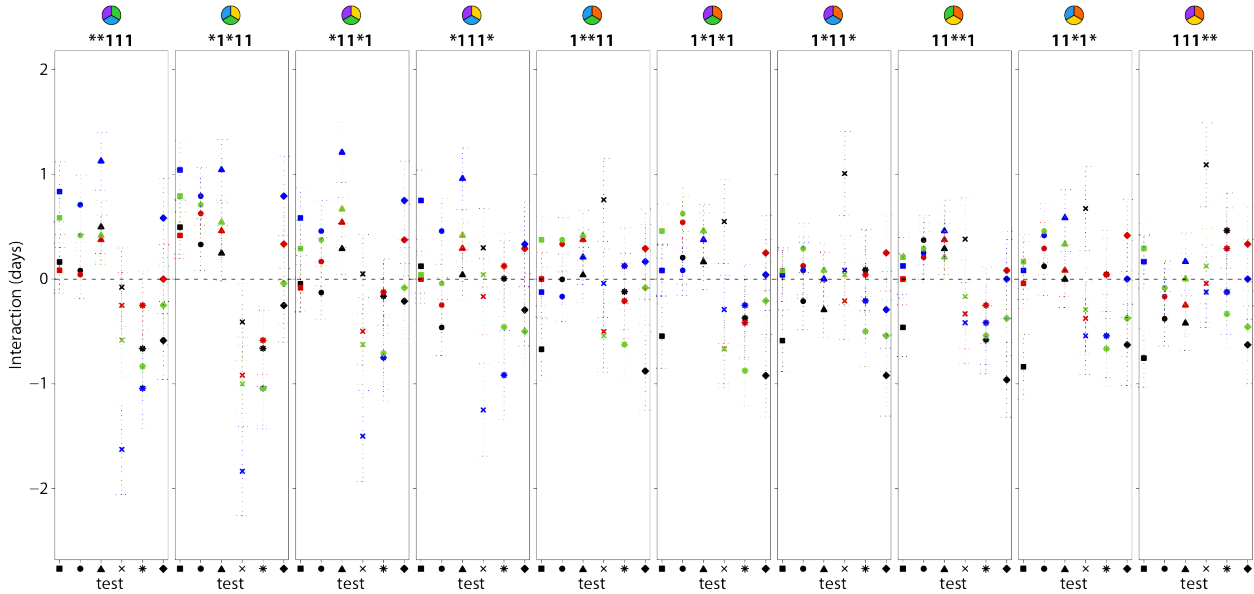

### F 3-way bacterial interactions

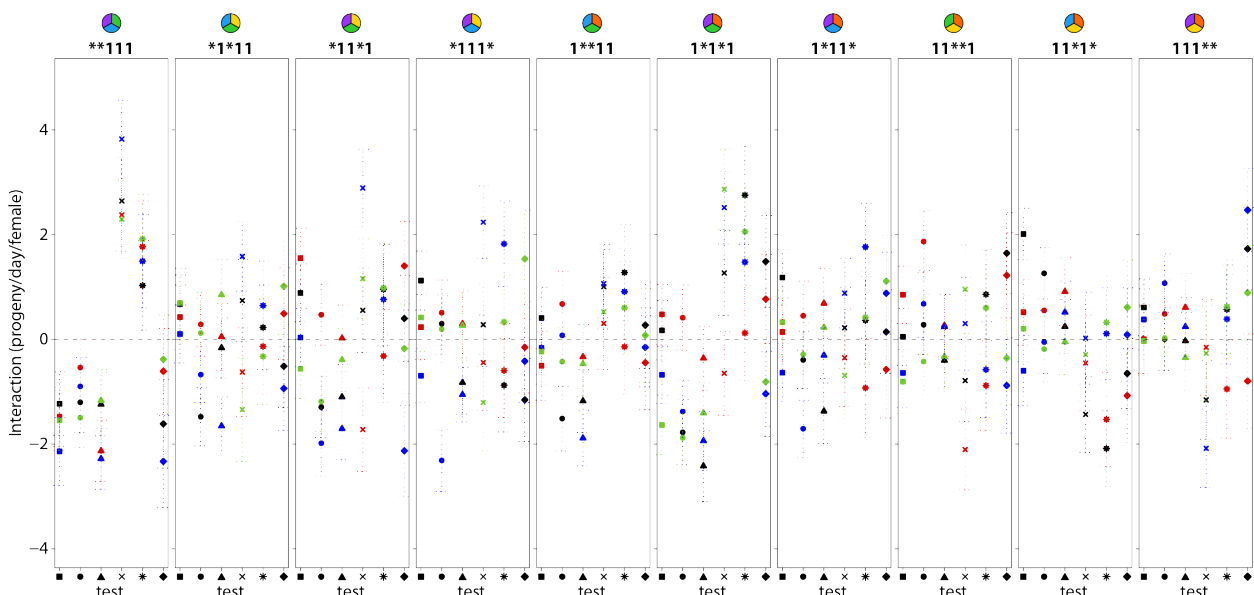

● *Lactobacillus plantarum*
● *Lactobacillus brevis*
● *Acetobacter pasteurianus*
● *Acetobacter tropicalis*
● *Acetobacter orientalis*

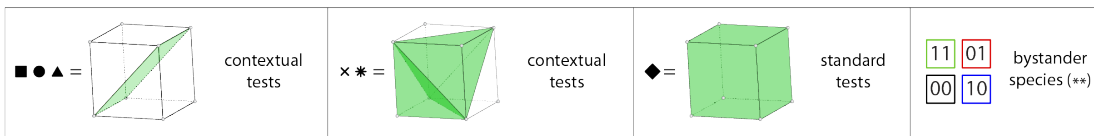

**Figure S13. Detailed comparisons of the context-dependence of two-way and three-way interactions depending on bystander species.** The pairwise interaction was calculated between each pair of species for each set of possible bystander species as in Fig. 5A for (A) bacterial load, (B) development time, and (C) fecundity. The standard three-way interaction as in Fig. 5B was compared with the related contextual tests as a function of bystander species present for (D) bacterial load, (E) development time, and (F) fecundity. Interactions on the total bacterial load in flies between sets of three species (equations  $g$ =square,  $i$ =circle,  $k$ =triangle,  $m$ =plus,  $n$ =ex ('x')),

and  $u_{111}$ =diamond in Math Supplement) are compared to determine (i) whether additive contextual tests can describe cases of non-additive standard tests and (ii) whether context of other species changes interactions (see Main Text).

Relevant equations (from Math Supplement):

$$g = w_{000} - w_{100} - w_{011} + w_{111} \quad (\text{squares}) \text{ contextual test};$$

$$i = w_{000} - w_{010} - w_{101} + w_{111} \quad (\text{circles}) \text{ contextual test};$$

$$k = w_{000} - w_{001} - w_{110} + w_{111} \quad (\text{triangles}) \text{ contextual test};$$

$$m = w_{001} + w_{010} + w_{100} - w_{111} - 2w_{000} \quad (\text{pluses}) \text{ contextual test};$$

$$n = w_{110} + w_{101} + w_{011} - w_{000} - 2w_{111} \quad (\text{exes}) \text{ contextual test};$$

$$u_{111} = w_{111} - (w_{110} + w_{101} + w_{011}) + (w_{100} + w_{010} + w_{001}) - w_{000} \quad (\text{diamonds}), \text{ the standard test.}$$

Figure S14

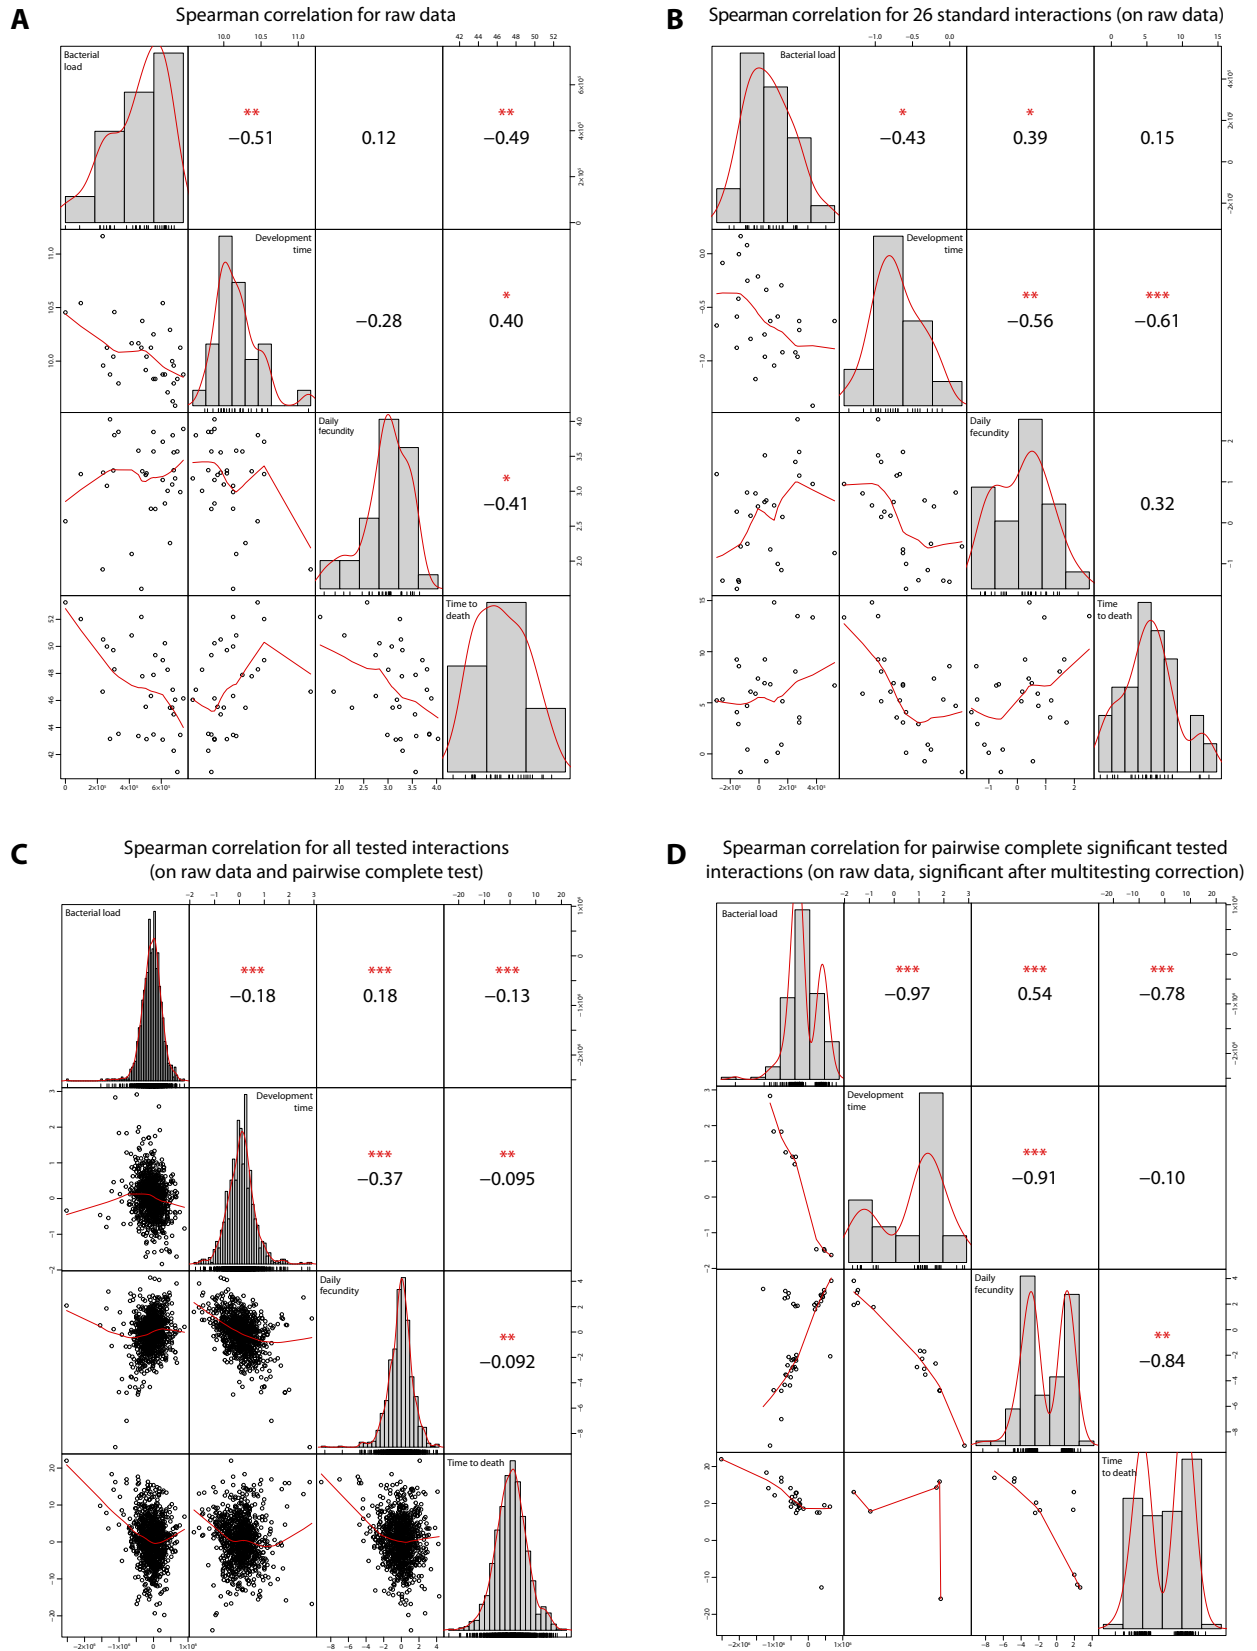

**Figure S14. Correlations of raw phenotypes and interactions.** (a) Raw data correlations between measured host and bacterial phenotypes indicate significant relationships between phenotypes except between fecundity and development and between fecundity and bacterial load. (b) Correlations of all standard interactions between measured host and bacterial phenotypes reveal different relationships than the raw phenotype data (compare with a). (c) Correlations of interaction strengths for all standard and contextual tests (26+910=936) highlight significant relationships between all phenotypes. (d) Significant interactions have opposite sign between phenotypes except between bacterial load and fecundity, which have the same sign. We observed significant relationships between all phenotypes. Correlations of only significant interactions (where the interaction was significant for both phenotypes) after multiple comparison correction (standard and contextual tests) between measured host and bacterial phenotypes are shown. Scatter plots appear below the diagonal and histograms are on the diagonal (gray bars = histogram; red line on histograms = kernel density function with Gaussian kernel). Correlations are all Spearman coefficients (data were not all normally distributed by Shapiro-Wilk tests, see results in Math Supplement). Significance values (\* $p < 0.005$ ; \*\* $p < 0.001$ ; \*\*\* $p < 0.0001$ ) appear above the diagonal.

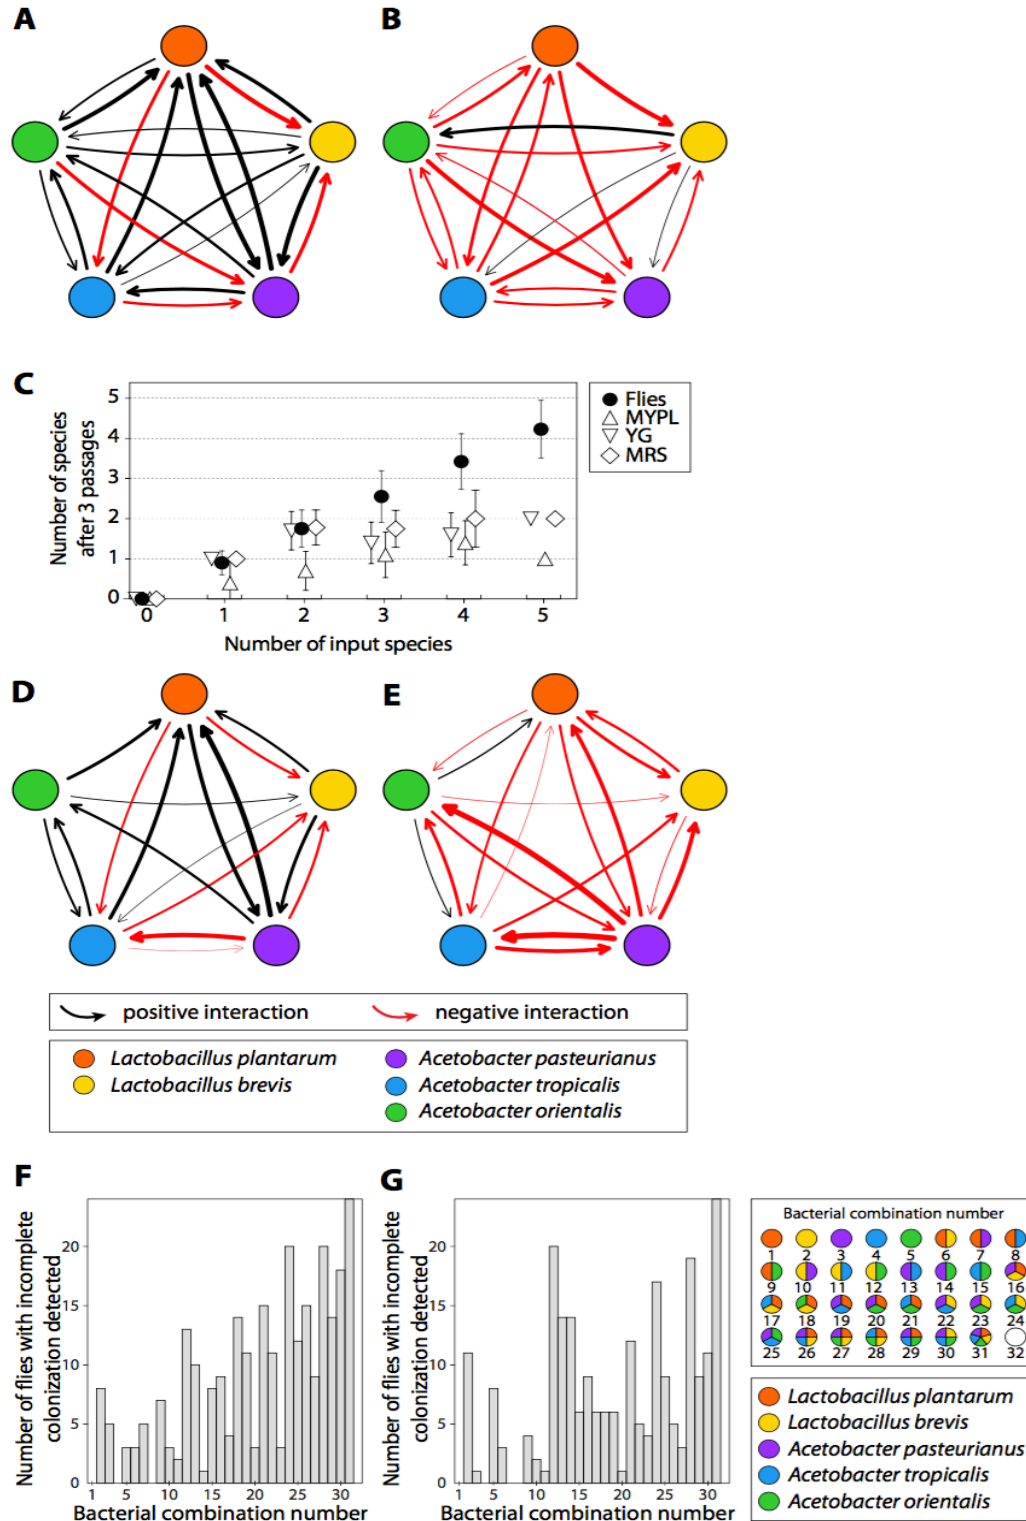

**Figure S15. Pairwise bacterial interactions in the fly gut transition from positive to negative as diversity increases. (A)** Interactions calculated by Paine's (33) method for mean CFU abundance data from bacterial combinations with one or two species. **(B)** Interactions calculated by Paine's (33) method for mean CFU abundance data from bacterial combinations with four or five species. **(C)** We were not able to maintain the 5 species

community in three rich growth liquid media formulated to (i) mimic the fly media (YG), (ii) optimize *Lactobacillus* growth (MRS), (iii) optimize *Acetobacter* growth (MYPL). In agreement with previous reports (32), we found that *in vitro* culture supported only low diversity, with a maximum of two species coexisting in the three rich media types, with the exception of one three member community. **(D)** Interactions calculated using the Lotka-Volterra fitting approach with all individual fly CFU abundance data from bacterial combinations with one or two species. **(E)** Interactions calculated using the Lotka-Volterra fitting approach with 3, 4 or 5 species combinations. **(F)** The number of flies where not all inoculated bacterial species were detected (1,000 CFUs limit of detection) increases as the total species diversity increases when flies were continuously fed bacteria. **(G)** The number of flies where not all inoculated bacterial species were detected (1,000 CFUs limit of detection) increases as the total species diversity increases when flies were daily transitioned to germ-free food for 5 days following an initial 10-day continuous inoculation period. For Fig. 6 and S15A,B, flies were eliminated from the analysis if not all inoculated bacterial species were detected.

Figure S16

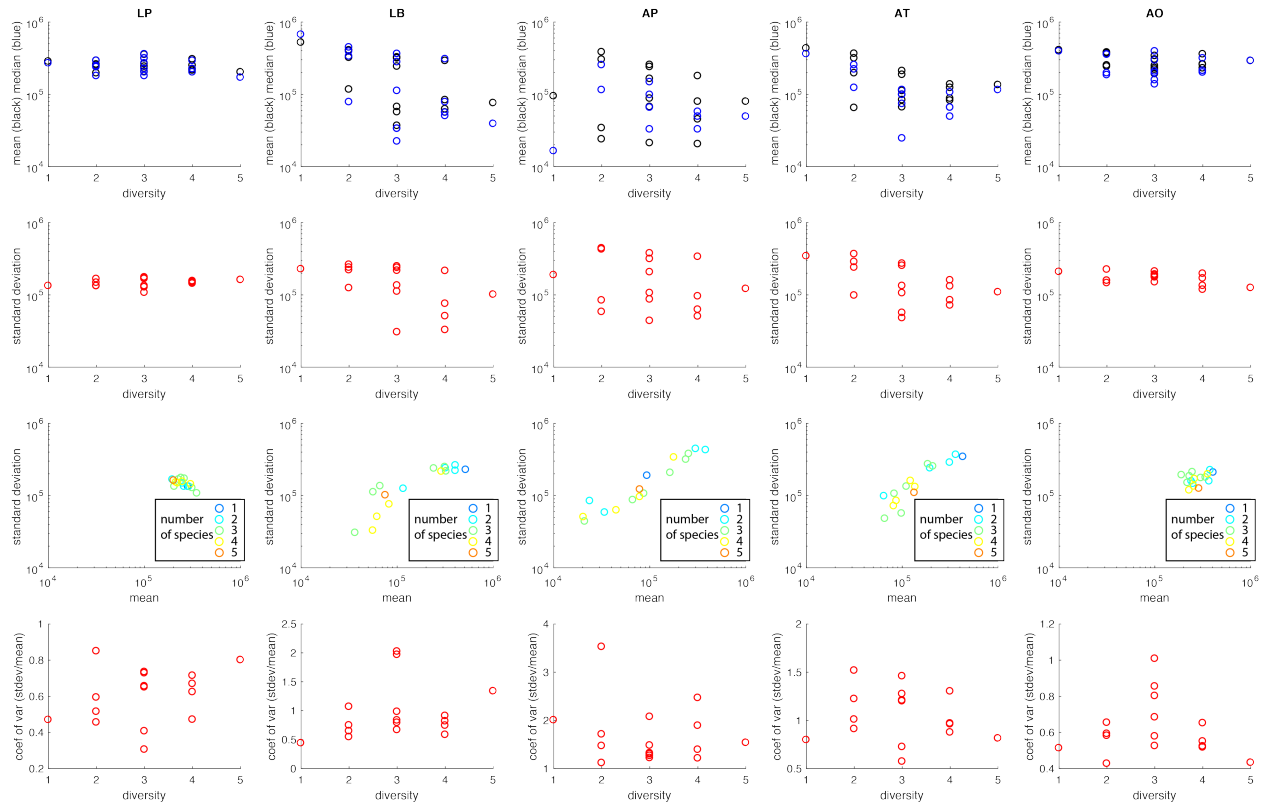

**Figure S16: Variation in bacterial load decreases for increasing diversity.**

Top row: We calculated the mean (black) and median (blue) bacterial load for each species as a function of increasing number of species, observing a decrease in abundance for increasing diversity. Second row: the Standard deviation also decreases for Lb, Ap, At, and Ao. Third row: the mean and standard deviation were correlated for Lb, Ap, and At. They were anti-correlated for Lp, and not significantly correlated for Ao. Fourth row: the coefficient of variation was roughly constant for each species. However, for the complete microbiome, the coefficient of variation decreased

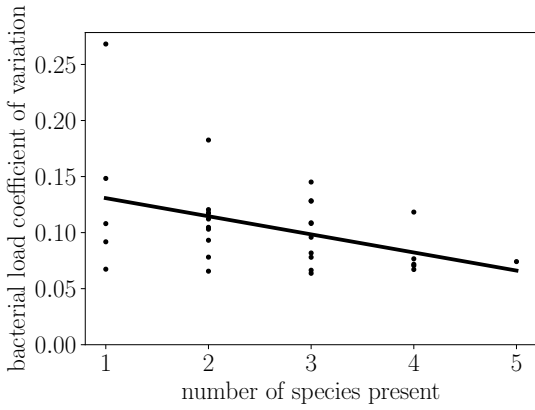

**Figure S17. Bacterial load coefficient of variation decreases with increasing diversity.** We calculated the coefficient of variation in the total bacterial load as a function of increasing gut diversity, finding a decrease ( $p=0.02$ , Wald test; Math Supplement Section 10.5).



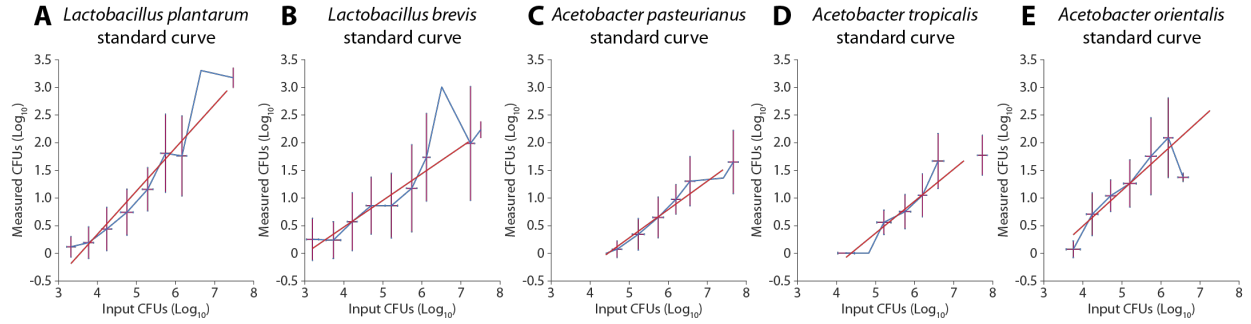

**Figure S18. Standard curves used to calculate total CFUs from colony counts (Fig. S4, S6, S9).** A standard curve was constructed by plating known concentrations of bacteria on selective medium with a 96-pin replicator as in *Bacterial load counts* (Methods). Counts were fit to a power law curve using the NLINFIT function in MATLAB v2017a.

**Table S1.** Data means and standard errors (SE) from Fig. 2 that were used to calculate interactions in Figures 2,4,5. Binary ID corresponds to Fig 1A and Figure 4A.

| Binary ID | Treatment | Daily Fecundity (eggs/female/day) | Daily Fecundity (SE) | Daily Fecundity (N) | Total Fecundity | Total Fecundity (SE) | Time to Death (days) | Time to Death (SE) | Time to Death (N) | Development Time (days) | Development Time (SE) | Development Time (N) | Mean Bacterial Load (CFUs) | Bacterial Load (SE) | Bacterial Load (N) |
|-----------|-----------|-----------------------------------|----------------------|---------------------|-----------------|----------------------|----------------------|--------------------|-------------------|-------------------------|-----------------------|----------------------|----------------------------|---------------------|--------------------|
| 00000     | 32        | 2.570                             | 0.282                | 52                  | 130.43          | 5.2141               | 53.25                | 1.45               | 80                | 10.455                  | 0.143                 | 22                   | 0                          | 0                   | 48                 |
| 10000     | 1         | 1.881                             | 0.183                | 65                  | 96.463          | 9.5197               | 46.65                | 1.50               | 100               | 11.167                  | 0.177                 | 24                   | 233245.42                  | 21412.15            | 48                 |
| 01000     | 2         | 1.603                             | 0.194                | 52                  | 85.656          | 15.41                | 52.18                | 1.73               | 80                | 10.125                  | 0.110                 | 24                   | 475712.50                  | 32052.66            | 48                 |
| 00100     | 3         | 3.246                             | 0.293                | 65                  | 165.46          | 6.8996               | 52.02                | 1.51               | 100               | 10.542                  | 0.134                 | 24                   | 96439.58                   | 28008.52            | 48                 |
| 00010     | 4         | 3.803                             | 0.266                | 65                  | 181.43          | 2.9718               | 48.30                | 1.01               | 100               | 10.458                  | 0.104                 | 24                   | 306531.25                  | 45831.30            | 48                 |
| 00001     | 5         | 4.030                             | 0.334                | 65                  | 191.63          | 2.4205               | 43.16                | 1.14               | 100               | 9.875                   | 0.125                 | 24                   | 279266.67                  | 30165.37            | 48                 |
| 11000     | 6         | 2.102                             | 0.222                | 65                  | 108.59          | 5.4624               | 50.81                | 1.87               | 100               | 10.167                  | 0.115                 | 24                   | 414921.67                  | 42826.24            | 48                 |
| 10100     | 7         | 3.708                             | 0.385                | 65                  | 180.15          | 3.2493               | 48.98                | 1.42               | 100               | 10.542                  | 0.134                 | 24                   | 609631.25                  | 74105.91            | 48                 |
| 10010     | 8         | 3.286                             | 0.224                | 65                  | 157.07          | 2.8465               | 47.79                | 1.10               | 100               | 10.375                  | 0.132                 | 24                   | 481337.50                  | 56720.93            | 48                 |
| 10001     | 9         | 3.848                             | 0.326                | 65                  | 184.53          | 3.5578               | 43.48                | 0.99               | 100               | 9.833                   | 0.098                 | 24                   | 551514.58                  | 36281.12            | 48                 |
| 01100     | 10        | 2.825                             | 0.305                | 65                  | 145.34          | 7.3124               | 50.23                | 1.19               | 100               | 9.875                   | 0.092                 | 24                   | 622841.67                  | 74050.39            | 48                 |
| 01010     | 11        | 2.258                             | 0.236                | 65                  | 115.47          | 5.3909               | 45.46                | 1.08               | 100               | 10.292                  | 0.127                 | 24                   | 654837.50                  | 88718.72            | 48                 |
| 01001     | 12        | 3.801                             | 0.278                | 65                  | 178.32          | 2.4106               | 46.79                | 1.07               | 100               | 9.625                   | 0.118                 | 24                   | 671834.17                  | 52555.70            | 48                 |
| 00110     | 13        | 3.077                             | 0.285                | 65                  | 156.53          | 4.6458               | 49.99                | 0.94               | 100               | 10.125                  | 0.125                 | 24                   | 259983.33                  | 50392.53            | 48                 |
| 00101     | 14        | 3.266                             | 0.301                | 65                  | 155.63          | 2.713                | 50.51                | 1.31               | 100               | 9.958                   | 0.165                 | 24                   | 236139.58                  | 28015.66            | 48                 |
| 00011     | 15        | 3.850                             | 0.329                | 65                  | 182.46          | 2.2346               | 43.53                | 1.16               | 100               | 9.792                   | 0.134                 | 24                   | 332337.50                  | 31499.85            | 48                 |
| 11100     | 16        | 2.746                             | 0.296                | 65                  | 144.93          | 10.75                | 49.35                | 1.29               | 100               | 9.833                   | 0.130                 | 24                   | 562772.92                  | 72784.20            | 48                 |
| 11010     | 17        | 3.580                             | 0.266                | 65                  | 174.49          | 3.8842               | 43.37                | 1.23               | 100               | 10.167                  | 0.187                 | 24                   | 457034.17                  | 44228.94            | 48                 |
| 11001     | 18        | 3.161                             | 0.322                | 65                  | 153.97          | 3.3452               | 43.10                | 1.34               | 100               | 9.875                   | 0.110                 | 24                   | 609145.83                  | 40513.51            | 48                 |
| 10110     | 19        | 3.569                             | 0.294                | 65                  | 173.59          | 3.5142               | 47.89                | 1.24               | 100               | 10.250                  | 0.138                 | 24                   | 551583.33                  | 81965.04            | 48                 |
| 10101     | 20        | 2.749                             | 0.338                | 65                  | 145.53          | 15.304               | 46.33                | 1.19               | 100               | 10.125                  | 0.125                 | 24                   | 535355.00                  | 59542.90            | 48                 |
| 10011     | 21        | 3.569                             | 0.350                | 65                  | 174.18          | 3.4082               | 40.71                | 0.91               | 100               | 9.833                   | 0.130                 | 24                   | 700770.83                  | 44902.50            | 48                 |
| 01110     | 22        | 3.233                             | 0.347                | 65                  | 164.88          | 5.8153               | 45.53                | 1.02               | 100               | 9.917                   | 0.133                 | 24                   | 503093.75                  | 55993.51            | 48                 |
| 01101     | 23        | 3.184                             | 0.313                | 65                  | 160.32          | 5.373                | 46.05                | 1.13               | 100               | 9.583                   | 0.119                 | 24                   | 686791.67                  | 56946.65            | 48                 |
| 01011     | 24        | 3.556                             | 0.287                | 65                  | 166.53          | 2.2059               | 44.97                | 0.96               | 100               | 9.958                   | 0.127                 | 24                   | 677964.58                  | 53131.35            | 48                 |
| 00111     | 25        | 3.297                             | 0.305                | 65                  | 159.62          | 3.3159               | 49.72                | 1.02               | 100               | 10.042                  | 0.112                 | 24                   | 299869.58                  | 40955.49            | 48                 |
| 11110     | 26        | 3.096                             | 0.311                | 65                  | 159.82          | 8.3454               | 45.47                | 1.14               | 100               | 10.000                  | 0.147                 | 24                   | 688435.42                  | 80306.35            | 48                 |
| 11101     | 27        | 3.006                             | 0.334                | 65                  | 149.54          | 4.1132               | 48.27                | 1.15               | 100               | 9.708                   | 0.153                 | 24                   | 639993.75                  | 45986.21            | 48                 |
| 11011     | 28        | 3.892                             | 0.310                | 65                  | 185.49          | 2.2084               | 46.15                | 1.05               | 100               | 9.875                   | 0.125                 | 24                   | 738166.67                  | 53287.80            | 48                 |
| 10111     | 29        | 3.256                             | 0.334                | 65                  | 159.95          | 4.3024               | 43.14                | 1.01               | 100               | 10.042                  | 0.127                 | 24                   | 507893.75                  | 40493.53            | 48                 |
| 01111     | 30        | 3.301                             | 0.326                | 65                  | 166.47          | 8.5605               | 42.28                | 1.11               | 100               | 9.792                   | 0.104                 | 24                   | 678083.33                  | 46462.03            | 48                 |
| 11111     | 31        | 2.988                             | 0.306                | 65                  | 149.56          | 4.4131               | 43.45                | 1.12               | 100               | 10.125                  | 0.110                 | 24                   | 719135.42                  | 54260.31            | 48                 |

**Table S2: Multivariate linear regression analysis of fecundity data to calculate interactions**

| Model | SE (residual) | DF   | R <sup>2</sup> (adj.) | F     | P       | Parameter | Estimate | SE    | t            |
|-------|---------------|------|-----------------------|-------|---------|-----------|----------|-------|--------------|
| Lp    | 2.46          | 2052 | -3.5E-04              | 0.27  | 6.0E-01 | Intercept | 3.209    | 0.077 | <b>41.50</b> |
|       |               |      |                       |       |         | Lp        | -0.057   | 0.109 | -0.52        |
| Lb    | 2.46          | 2052 | 0.003                 | 6.45  | 1.1E-02 | Intercept | 3.318    | 0.077 | <b>43.23</b> |
|       |               |      |                       |       |         | Lb        | -0.276   | 0.109 | <b>-2.54</b> |
| Ap    | 2.46          | 2052 | -4.1E-04              | 0.17  | 6.8E-01 | Intercept | 3.203    | 0.077 | <b>41.42</b> |
|       |               |      |                       |       |         | Ap        | -0.044   | 0.109 | -0.41        |
| At    | 2.46          | 2052 | 0.004                 | 9.73  | 1.8E-03 | Intercept | 3.009    | 0.077 | <b>39.02</b> |
|       |               |      |                       |       |         | At        | 0.338    | 0.108 | <b>3.12</b>  |
| Ao    | 2.45          | 2052 | 0.009                 | 20.48 | 6.4E-06 | Intercept | 2.933    | 0.077 | <b>38.11</b> |
|       |               |      |                       |       |         | Ao        | 0.489    | 0.108 | <b>4.53</b>  |
| Lp*Lb | 2.46          | 2050 | 0.003                 | 2.73  | 4.3E-02 | Intercept | 3.413    | 0.109 | <b>31.26</b> |
|       |               |      |                       |       |         | Lp        | -0.188   | 0.154 | -1.22        |
|       |               |      |                       |       |         | Lb        | -0.408   | 0.154 | <b>-2.64</b> |
|       |               |      |                       |       |         | Lp:Lb     | 0.262    | 0.217 | 1.21         |
| Lp*Ap | 2.46          | 2050 | -0.001                | 0.16  | 9.3E-01 | Intercept | 3.241    | 0.111 | <b>29.24</b> |
|       |               |      |                       |       |         | Lp        | -0.075   | 0.155 | -0.49        |
|       |               |      |                       |       |         | Ap        | -0.063   | 0.155 | -0.41        |
|       |               |      |                       |       |         | Lp:Ap     | 0.035    | 0.217 | 0.16         |
| Lp*At | 2.46          | 2050 | 0.004                 | 4.01  | 7.4E-03 | Intercept | 3.117    | 0.111 | <b>28.20</b> |
|       |               |      |                       |       |         | Lp        | -0.210   | 0.154 | -1.36        |
|       |               |      |                       |       |         | At        | 0.180    | 0.154 | 1.17         |
|       |               |      |                       |       |         | Lp:At     | 0.311    | 0.217 | 1.44         |
| Lp*Ao | 2.45          | 2050 | 0.010                 | 7.81  | 3.5E-05 | Intercept | 2.866    | 0.110 | <b>26.00</b> |
|       |               |      |                       |       |         | Lp        | 0.130    | 0.154 | 0.85         |
|       |               |      |                       |       |         | Ao        | 0.670    | 0.154 | <b>4.35</b>  |
|       |               |      |                       |       |         | Lp:Ao     | -0.357   | 0.216 | -1.65        |
| Lb*Ap | 2.46          | 2050 | 0.002                 | 2.29  | 7.7E-02 | Intercept | 3.368    | 0.109 | <b>30.80</b> |
|       |               |      |                       |       |         | Lb        | -0.330   | 0.154 | <b>-2.14</b> |
|       |               |      |                       |       |         | Ap        | -0.099   | 0.154 | -0.64        |
|       |               |      |                       |       |         | Lb:Ap     | 0.108    | 0.217 | 0.50         |
| Lb*At | 2.45          | 2050 | 0.007                 | 5.57  | 8.3E-04 | Intercept | 3.184    | 0.109 | <b>29.25</b> |
|       |               |      |                       |       |         | Lb        | -0.350   | 0.154 | <b>-2.27</b> |
|       |               |      |                       |       |         | At        | 0.266    | 0.153 | 1.74         |
|       |               |      |                       |       |         | Lb:At     | 0.146    | 0.217 | 0.67         |
| Lb*Ao | 2.45          | 2050 | 0.013                 | 9.87  | 1.9E-06 | Intercept | 3.157    | 0.109 | <b>29.06</b> |
|       |               |      |                       |       |         | Lb        | -0.449   | 0.154 | <b>-2.92</b> |
|       |               |      |                       |       |         | Ao        | 0.319    | 0.153 | <b>2.09</b>  |
|       |               |      |                       |       |         | Lb:Ao     | 0.342    | 0.216 | 1.58         |

|          |      |      |       |       |         |           |        |       |              |
|----------|------|------|-------|-------|---------|-----------|--------|-------|--------------|
| Ap*At    | 2.46 | 2050 | 0.005 | 4.65  | 3.0E-03 | Intercept | 2.916  | 0.111 | <b>26.39</b> |
|          |      |      |       |       |         | Ap        | 0.182  | 0.154 | 1.18         |
|          |      |      |       |       |         | At        | 0.560  | 0.154 | <b>3.63</b>  |
|          |      |      |       |       |         | Ap:At     | -0.438 | 0.217 | <b>-2.02</b> |
| Ap*Ao    | 2.44 | 2050 | 0.021 | 15.81 | 3.7E-10 | Intercept | 2.664  | 0.110 | <b>24.31</b> |
|          |      |      |       |       |         | Ap        | 0.523  | 0.153 | <b>3.42</b>  |
|          |      |      |       |       |         | Ao        | 1.050  | 0.153 | <b>6.86</b>  |
|          |      |      |       |       |         | Ap:Ao     | -1.108 | 0.215 | <b>-5.15</b> |
| At*Ao    | 2.44 | 2050 | 0.017 | 12.51 | 4.2E-08 | Intercept | 2.611  | 0.110 | <b>23.77</b> |
|          |      |      |       |       |         | At        | 0.627  | 0.153 | <b>4.08</b>  |
|          |      |      |       |       |         | Ao        | 0.775  | 0.153 | <b>5.06</b>  |
|          |      |      |       |       |         | At:Ao     | -0.556 | 0.216 | <b>-2.58</b> |
| Lp*Lb*Ap | 2.46 | 2046 | 0.004 | 2.13  | 3.7E-02 | Intercept | 3.615  | 0.156 | <b>23.12</b> |
|          |      |      |       |       |         | Lp        | -0.482 | 0.219 | <b>-2.21</b> |
|          |      |      |       |       |         | Lb        | -0.748 | 0.221 | <b>-3.38</b> |
|          |      |      |       |       |         | Ap        | -0.394 | 0.218 | -1.80        |
|          |      |      |       |       |         | Lp:Lb     | 0.814  | 0.309 | <b>2.64</b>  |
|          |      |      |       |       |         | Lp:Ap     | 0.579  | 0.307 | 1.89         |
|          |      |      |       |       |         | Lb:Ap     | 0.662  | 0.309 | <b>2.14</b>  |
|          |      |      |       |       |         | Lp:Lb:Ap  | -1.087 | 0.434 | <b>-2.51</b> |
| Lp*Lb*At | 2.45 | 2046 | 0.007 | 3.02  | 3.7E-03 | Intercept | 3.315  | 0.156 | <b>21.23</b> |
|          |      |      |       |       |         | Lp        | -0.255 | 0.218 | -1.17        |
|          |      |      |       |       |         | Lb        | -0.396 | 0.221 | -1.80        |
|          |      |      |       |       |         | At        | 0.191  | 0.218 | 0.88         |
|          |      |      |       |       |         | Lp:Lb     | 0.090  | 0.308 | 0.29         |
|          |      |      |       |       |         | Lp:At     | 0.141  | 0.306 | 0.46         |
|          |      |      |       |       |         | Lb:At     | -0.023 | 0.308 | -0.08        |
|          |      |      |       |       |         | Lp:Lb:At  | 0.340  | 0.433 | 0.79         |
| Lp*Lb*Ao | 2.45 | 2046 | 0.013 | 4.97  | 1.4E-05 | Intercept | 3.206  | 0.156 | <b>20.60</b> |
|          |      |      |       |       |         | Lp        | -0.095 | 0.217 | -0.44        |
|          |      |      |       |       |         | Lb        | -0.680 | 0.220 | <b>-3.09</b> |
|          |      |      |       |       |         | Ao        | 0.405  | 0.217 | 1.86         |
|          |      |      |       |       |         | Lp:Lb     | 0.450  | 0.307 | 1.46         |
|          |      |      |       |       |         | Lp:Ao     | -0.175 | 0.306 | -0.57        |
|          |      |      |       |       |         | Lb:Ao     | 0.529  | 0.307 | 1.72         |
|          |      |      |       |       |         | Lp:Lb:Ao  | -0.363 | 0.432 | -0.84        |
| Lp*Ap*At | 2.46 | 2046 | 0.005 | 2.52  | 1.4E-02 | Intercept | 3.102  | 0.161 | <b>19.33</b> |
|          |      |      |       |       |         | Lp        | -0.354 | 0.221 | -1.60        |
|          |      |      |       |       |         | Ap        | 0.028  | 0.221 | 0.13         |
|          |      |      |       |       |         | At        | 0.264  | 0.221 | 1.19         |

|          |      |      |       |      |         |           |        |       |              |
|----------|------|------|-------|------|---------|-----------|--------|-------|--------------|
|          |      |      |       |      |         | Lp:Ap     | 0.290  | 0.309 | 0.94         |
|          |      |      |       |      |         | Lp:At     | 0.572  | 0.309 | 1.85         |
|          |      |      |       |      |         | Ap:At     | -0.167 | 0.309 | -0.54        |
|          |      |      |       |      |         | Lp:Ap:At  | -0.523 | 0.434 | -1.21        |
| Lp*Ap*Ao | 2.44 | 2046 | 0.021 | 7.24 | 1.4E-08 | Intercept | 2.611  | 0.159 | <b>16.39</b> |
|          |      |      |       |      |         | Lp        | 0.101  | 0.220 | 0.46         |
|          |      |      |       |      |         | Ap        | 0.484  | 0.220 | <b>2.21</b>  |
|          |      |      |       |      |         | Ao        | 1.198  | 0.220 | <b>5.46</b>  |
|          |      |      |       |      |         | Lp:Ap     | 0.083  | 0.306 | 0.27         |
|          |      |      |       |      |         | Lp:Ao     | -0.290 | 0.306 | -0.95        |
|          |      |      |       |      |         | Ap:Ao     | -1.031 | 0.306 | <b>-3.37</b> |
|          |      |      |       |      |         | Lp:Ap:Ao  | -0.160 | 0.430 | -0.37        |
| Lp*At*Ao | 2.44 | 2046 | 0.017 | 6.07 | 5.0E-07 | Intercept | 2.614  | 0.160 | <b>16.38</b> |
|          |      |      |       |      |         | Lp        | -0.004 | 0.220 | -0.02        |
|          |      |      |       |      |         | At        | 0.479  | 0.220 | <b>2.18</b>  |
|          |      |      |       |      |         | Ao        | 0.957  | 0.220 | <b>4.35</b>  |
|          |      |      |       |      |         | Lp:At     | 0.294  | 0.307 | 0.96         |
|          |      |      |       |      |         | Lp:Ao     | -0.362 | 0.307 | -1.18        |
|          |      |      |       |      |         | At:Ao     | -0.549 | 0.307 | -1.79        |
|          |      |      |       |      |         | Lp:At:Ao  | -0.014 | 0.431 | -0.03        |
| Lb*Ap*At | 2.45 | 2046 | 0.007 | 3.04 | 3.5E-03 | Intercept | 3.109  | 0.156 | <b>19.92</b> |
|          |      |      |       |      |         | Lb        | -0.387 | 0.221 | -1.75        |
|          |      |      |       |      |         | Ap        | 0.146  | 0.218 | 0.67         |
|          |      |      |       |      |         | At        | 0.506  | 0.218 | <b>2.32</b>  |
|          |      |      |       |      |         | Lb:Ap     | 0.072  | 0.308 | 0.23         |
|          |      |      |       |      |         | Lb:At     | 0.108  | 0.308 | 0.35         |
|          |      |      |       |      |         | Ap:At     | -0.477 | 0.306 | -1.56        |
|          |      |      |       |      |         | Lb:Ap:At  | 0.077  | 0.433 | 0.18         |
| Lb*Ap*Ao | 2.43 | 2046 | 0.024 | 8.15 | 8.0E-10 | Intercept | 2.902  | 0.155 | <b>18.75</b> |
|          |      |      |       |      |         | Lb        | -0.475 | 0.219 | <b>-2.17</b> |
|          |      |      |       |      |         | Ap        | 0.498  | 0.216 | <b>2.31</b>  |
|          |      |      |       |      |         | Ao        | 0.912  | 0.216 | <b>4.22</b>  |
|          |      |      |       |      |         | Lb:Ap     | 0.050  | 0.306 | 0.16         |
|          |      |      |       |      |         | Lb:Ao     | 0.277  | 0.306 | 0.91         |
|          |      |      |       |      |         | Ap:Ao     | -1.173 | 0.304 | <b>-3.86</b> |
|          |      |      |       |      |         | Lb:Ap:Ao  | 0.128  | 0.430 | 0.30         |
| Lb*At*Ao | 2.44 | 2046 | 0.019 | 6.75 | 6.2E-08 | Intercept | 2.866  | 0.155 | <b>18.47</b> |
|          |      |      |       |      |         | Lb        | -0.510 | 0.219 | <b>-2.32</b> |
|          |      |      |       |      |         | At        | 0.568  | 0.217 | <b>2.62</b>  |
|          |      |      |       |      |         | Ao        | 0.619  | 0.216 | <b>2.86</b>  |

|             |      |      |       |       |         |             |        |       |              |
|-------------|------|------|-------|-------|---------|-------------|--------|-------|--------------|
|             |      |      |       |       |         | Lb:At       | 0.118  | 0.306 | 0.39         |
|             |      |      |       |       |         | Lb:Ao       | 0.312  | 0.306 | 1.02         |
|             |      |      |       |       |         | At:Ao       | -0.586 | 0.305 | -1.92        |
|             |      |      |       |       |         | Lb:At:Ao    | 0.062  | 0.431 | 0.14         |
| Ap*At*Ao    | 2.42 | 2046 | 0.034 | 11.27 | 4.5E-14 | Intercept   | 2.034  | 0.158 | <b>12.86</b> |
|             |      |      |       |       |         | Ap          | 1.098  | 0.218 | <b>5.03</b>  |
|             |      |      |       |       |         | At          | 1.198  | 0.218 | <b>5.49</b>  |
|             |      |      |       |       |         | Ao          | 1.676  | 0.218 | <b>7.69</b>  |
|             |      |      |       |       |         | Ap:At       | -1.085 | 0.304 | <b>-3.57</b> |
|             |      |      |       |       |         | Ap:Ao       | -1.743 | 0.304 | <b>-5.73</b> |
|             |      |      |       |       |         | At:Ao       | -1.189 | 0.304 | <b>-3.91</b> |
|             |      |      |       |       |         | Ap:At:Ao    | 1.206  | 0.428 | <b>2.82</b>  |
| Lp*Lb*Ap*At | 2.45 | 2038 | 0.010 | 2.36  | 2.3E-03 | Intercept   | 3.381  | 0.227 | <b>14.93</b> |
|             |      |      |       |       |         | Lp          | -0.516 | 0.312 | -1.65        |
|             |      |      |       |       |         | Lb          | -0.557 | 0.320 | -1.74        |
|             |      |      |       |       |         | Ap          | -0.125 | 0.312 | -0.40        |
|             |      |      |       |       |         | At          | 0.445  | 0.312 | 1.43         |
|             |      |      |       |       |         | Lp:Lb       | 0.324  | 0.442 | 0.73         |
|             |      |      |       |       |         | Lp:Ap       | 0.514  | 0.435 | 1.18         |
|             |      |      |       |       |         | Lb:Ap       | 0.305  | 0.442 | 0.69         |
|             |      |      |       |       |         | Lp:At       | 0.093  | 0.436 | 0.21         |
|             |      |      |       |       |         | Lb:At       | -0.362 | 0.442 | -0.82        |
|             |      |      |       |       |         | Ap:At       | -0.514 | 0.436 | -1.18        |
|             |      |      |       |       |         | Lp:Lb:Ap    | -0.450 | 0.616 | -0.73        |
|             |      |      |       |       |         | Lp:Lb:At    | 0.955  | 0.616 | 1.55         |
|             |      |      |       |       |         | Lp:Ap:At    | 0.104  | 0.612 | 0.17         |
|             |      |      |       |       |         | Lb:Ap:At    | 0.694  | 0.616 | 1.13         |
|             |      |      |       |       |         | Lp:Lb:Ap:At | -1.250 | 0.865 | -1.44        |
| Lp*Lb*Ap*Ao | 2.43 | 2038 | 0.028 | 5.01  | 8.6E-10 | Intercept   | 3.255  | 0.224 | <b>14.51</b> |
|             |      |      |       |       |         | Lp          | -0.671 | 0.309 | <b>-2.17</b> |
|             |      |      |       |       |         | Lb          | -1.288 | 0.317 | <b>-4.06</b> |
|             |      |      |       |       |         | Ap          | -0.094 | 0.309 | -0.30        |
|             |      |      |       |       |         | Ao          | 0.685  | 0.309 | <b>2.21</b>  |
|             |      |      |       |       |         | Lp:Lb       | 1.545  | 0.437 | <b>3.53</b>  |
|             |      |      |       |       |         | Lp:Ap       | 1.149  | 0.432 | <b>2.66</b>  |
|             |      |      |       |       |         | Lb:Ap       | 1.156  | 0.437 | <b>2.64</b>  |
|             |      |      |       |       |         | Lp:Ao       | 0.419  | 0.432 | 0.97         |
|             |      |      |       |       |         | Lb:Ao       | 1.027  | 0.437 | <b>2.35</b>  |
|             |      |      |       |       |         | Ap:Ao       | -0.564 | 0.432 | -1.31        |
|             |      |      |       |       |         | Lp:Lb:Ap    | -2.131 | 0.610 | <b>-3.49</b> |

|             |      |      |       |      |         |             |        |       |              |
|-------------|------|------|-------|------|---------|-------------|--------|-------|--------------|
|             |      |      |       |      |         | Lp:Lb:Ao    | -1.416 | 0.610 | <b>-2.32</b> |
|             |      |      |       |      |         | Lp:Ap:Ao    | -1.180 | 0.606 | -1.95        |
|             |      |      |       |      |         | Lb:Ap:Ao    | -0.934 | 0.610 | -1.53        |
|             |      |      |       |      |         | Lp:Lb:Ap:Ao | 2.040  | 0.857 | <b>2.38</b>  |
| Lp*Lb*At*Ao | 2.44 | 2038 | 0.019 | 3.67 | 2.2E-06 | Intercept   | 2.945  | 0.225 | <b>13.07</b> |
|             |      |      |       |      |         | Lp          | -0.151 | 0.311 | -0.49        |
|             |      |      |       |      |         | Lb          | -0.664 | 0.319 | <b>-2.08</b> |
|             |      |      |       |      |         | At          | 0.495  | 0.311 | 1.59         |
|             |      |      |       |      |         | Ao          | 0.703  | 0.311 | <b>2.26</b>  |
|             |      |      |       |      |         | Lp:Lb       | 0.293  | 0.439 | 0.67         |
|             |      |      |       |      |         | Lp:At       | 0.138  | 0.434 | 0.32         |
|             |      |      |       |      |         | Lb:At       | -0.030 | 0.439 | -0.07        |
|             |      |      |       |      |         | Lp:Ao       | -0.174 | 0.433 | -0.40        |
|             |      |      |       |      |         | Lb:Ao       | 0.508  | 0.439 | 1.16         |
|             |      |      |       |      |         | At:Ao       | -0.569 | 0.434 | -1.31        |
|             |      |      |       |      |         | Lp:Lb:At    | 0.312  | 0.613 | 0.51         |
|             |      |      |       |      |         | Lp:Lb:Ao    | -0.377 | 0.613 | -0.62        |
|             |      |      |       |      |         | Lp:At:Ao    | -0.029 | 0.609 | -0.05        |
|             |      |      |       |      |         | Lb:At:Ao    | 0.041  | 0.613 | 0.07         |
|             |      |      |       |      |         | Lp:Lb:At:Ao | 0.028  | 0.861 | 0.03         |
| Lp*Ap*At*Ao | 2.42 | 2038 | 0.033 | 5.66 | 1.6E-11 | Intercept   | 2.087  | 0.237 | <b>8.79</b>  |
|             |      |      |       |      |         | Lp          | -0.095 | 0.319 | -0.30        |
|             |      |      |       |      |         | Ap          | 0.949  | 0.319 | <b>2.98</b>  |
|             |      |      |       |      |         | At          | 0.944  | 0.319 | <b>2.96</b>  |
|             |      |      |       |      |         | Ao          | 1.829  | 0.319 | <b>5.74</b>  |
|             |      |      |       |      |         | Lp:Ap       | 0.287  | 0.438 | 0.66         |
|             |      |      |       |      |         | Lp:At       | 0.498  | 0.438 | 1.14         |
|             |      |      |       |      |         | Ap:At       | -0.824 | 0.438 | -1.88        |
|             |      |      |       |      |         | Lp:Ao       | -0.315 | 0.438 | -0.72        |
|             |      |      |       |      |         | Ap:Ao       | -1.639 | 0.438 | <b>-3.74</b> |
|             |      |      |       |      |         | At:Ao       | -1.156 | 0.438 | <b>-2.64</b> |
|             |      |      |       |      |         | Lp:Ap:At    | -0.513 | 0.610 | -0.84        |
|             |      |      |       |      |         | Lp:Ap:Ao    | -0.196 | 0.610 | -0.32        |
|             |      |      |       |      |         | Lp:At:Ao    | -0.054 | 0.610 | -0.09        |
|             |      |      |       |      |         | Ap:At:Ao    | 1.110  | 0.610 | 1.82         |
|             |      |      |       |      |         | Lp:Ap:At:Ao | 0.180  | 0.856 | 0.21         |
| Lb*Ap*At*Ao | 2.42 | 2038 | 0.036 | 6.17 | 7.1E-13 | Intercept   | 2.188  | 0.223 | <b>9.79</b>  |
|             |      |      |       |      |         | Lb          | -0.308 | 0.316 | -0.97        |
|             |      |      |       |      |         | Ap          | 1.289  | 0.308 | <b>4.19</b>  |
|             |      |      |       |      |         | At          | 1.357  | 0.308 | <b>4.41</b>  |

|                |      |      |       |      |         |             |        |       |              |
|----------------|------|------|-------|------|---------|-------------|--------|-------|--------------|
|                |      |      |       |      |         | Ao          | 1.752  | 0.308 | <b>5.69</b>  |
|                |      |      |       |      |         | Lb:Ap       | -0.384 | 0.436 | -0.88        |
|                |      |      |       |      |         | Lb:At       | -0.318 | 0.436 | -0.73        |
|                |      |      |       |      |         | Ap:At       | -1.511 | 0.430 | <b>-3.52</b> |
|                |      |      |       |      |         | Lb:Ao       | -0.151 | 0.436 | -0.35        |
|                |      |      |       |      |         | Ap:Ao       | -2.194 | 0.429 | <b>-5.11</b> |
|                |      |      |       |      |         | At:Ao       | -1.608 | 0.430 | <b>-3.74</b> |
|                |      |      |       |      |         | Lb:Ap:At    | 0.851  | 0.608 | 1.40         |
|                |      |      |       |      |         | Lb:Ap:Ao    | 0.902  | 0.608 | 1.48         |
|                |      |      |       |      |         | Lb:At:Ao    | 0.839  | 0.608 | 1.38         |
|                |      |      |       |      |         | Ap:At:Ao    | 1.973  | 0.604 | <b>3.27</b>  |
|                |      |      |       |      |         | Lb:Ap:At:Ao | -1.533 | 0.854 | -1.80        |
| Lp*Lb*Ap*At*Ao | 2.41 | 2022 | 0.040 | 3.75 | 2.1E-11 | Intercept   | 2.570  | 0.335 | <b>7.68</b>  |
|                |      |      |       |      |         | Lp          | -0.689 | 0.449 | -1.54        |
|                |      |      |       |      |         | Lb          | -0.968 | 0.473 | <b>-2.05</b> |
|                |      |      |       |      |         | Ap          | 0.675  | 0.449 | 1.50         |
|                |      |      |       |      |         | At          | 1.233  | 0.449 | <b>2.75</b>  |
|                |      |      |       |      |         | Ao          | 1.459  | 0.449 | <b>3.25</b>  |
|                |      |      |       |      |         | Lp:Lb       | 1.188  | 0.635 | 1.87         |
|                |      |      |       |      |         | Lp:Ap       | 1.152  | 0.617 | 1.87         |
|                |      |      |       |      |         | Lb:Ap       | 0.547  | 0.635 | 0.86         |
|                |      |      |       |      |         | Lp:At       | 0.172  | 0.617 | 0.28         |
|                |      |      |       |      |         | Lb:At       | -0.577 | 0.635 | -0.91        |
|                |      |      |       |      |         | Ap:At       | -1.401 | 0.617 | <b>-2.27</b> |
|                |      |      |       |      |         | Lp:Ao       | 0.508  | 0.617 | 0.82         |
|                |      |      |       |      |         | Lb:Ao       | 0.739  | 0.635 | 1.16         |
|                |      |      |       |      |         | Ap:Ao       | -1.438 | 0.617 | <b>-2.33</b> |
|                |      |      |       |      |         | At:Ao       | -1.412 | 0.617 | <b>-2.29</b> |
|                |      |      |       |      |         | Lp:Lb:Ap    | -1.729 | 0.872 | <b>-1.98</b> |
|                |      |      |       |      |         | Lp:Lb:At    | 0.651  | 0.872 | 0.75         |
|                |      |      |       |      |         | Lp:Ap:At    | -0.143 | 0.860 | -0.17        |
|                |      |      |       |      |         | Lb:Ap:At    | 1.154  | 0.872 | 1.32         |
|                |      |      |       |      |         | Lp:Lb:Ao    | -1.646 | 0.872 | -1.89        |
|                |      |      |       |      |         | Lp:Ap:Ao    | -1.430 | 0.859 | -1.67        |
|                |      |      |       |      |         | Lb:Ap:Ao    | -0.401 | 0.872 | -0.46        |
|                |      |      |       |      |         | Lp:At:Ao    | -0.318 | 0.860 | -0.37        |
|                |      |      |       |      |         | Lb:At:Ao    | 0.512  | 0.872 | 0.59         |
|                |      |      |       |      |         | Ap:At:Ao    | 1.611  | 0.860 | 1.88         |
|                |      |      |       |      |         | Lp:Lb:Ap:At | -0.739 | 1.216 | -0.61        |
|                |      |      |       |      |         | Lp:Lb:Ap:Ao | 2.469  | 1.215 | <b>2.03</b>  |



|                |        |       |       |
|----------------|--------|-------|-------|
| Lp:Lb:At:Ao    | 0.521  | 1.216 | 0.43  |
| Lp:Ap:At:Ao    | 0.646  | 1.207 | 0.54  |
| Lb:Ap:At:Ao    | -1.002 | 1.216 | -0.82 |
| Lp:Lb:Ap:At:Ao | -0.925 | 1.706 | -0.54 |

**Table S3: Multivariate linear regression analysis of development data to calculate interactions**

| Model | SE (residual) | DF  | R <sup>2</sup> (adj.) | F     | P         | Parameter | Estimate | SE    | t             |
|-------|---------------|-----|-----------------------|-------|-----------|-----------|----------|-------|---------------|
| Lp    | 0.70          | 764 | 0.003                 | 3.67  | 5.6E-02   | Intercept | 10.024   | 0.036 | <b>281.79</b> |
|       |               |     |                       |       |           | Lp        | 0.096    | 0.050 | 1.92          |
| Lb    | 0.68          | 764 | 0.039                 | 32.16 | 2.0E-08   | Intercept | 10.212   | 0.035 | <b>292.37</b> |
|       |               |     |                       |       |           | Lb        | -0.280   | 0.049 | <b>-5.67</b>  |
| Ap    | 0.70          | 764 | 0.003                 | 2.96  | 8.6E-02   | Intercept | 10.115   | 0.036 | <b>284.23</b> |
|       |               |     |                       |       |           | Ap        | -0.087   | 0.050 | -1.72         |
| At    | 0.70          | 764 | -0.001                | 0.07  | 7.9E-01   | Intercept | 10.079   | 0.036 | <b>282.67</b> |
|       |               |     |                       |       |           | At        | -0.013   | 0.050 | -0.27         |
| Ao    | 0.67          | 764 | 0.077                 | 64.87 | 3.1E-15   | Intercept | 10.267   | 0.034 | <b>299.92</b> |
|       |               |     |                       |       |           | Ao        | -0.389   | 0.048 | <b>-8.05</b>  |
| Lp*Lb | 0.68          | 762 | 0.042                 | 12.07 | 1.0E-07   | Intercept | 10.153   | 0.049 | <b>205.26</b> |
|       |               |     |                       |       |           | Lp        | 0.118    | 0.070 | 1.69          |
|       |               |     |                       |       |           | Lb        | -0.257   | 0.070 | <b>-3.68</b>  |
|       |               |     |                       |       |           | Lp:Lb     | -0.045   | 0.099 | -0.46         |
| Lp*Ap | 0.69          | 762 | 0.005                 | 2.21  | 8.6E-02   | Intercept | 10.068   | 0.050 | <b>199.75</b> |
|       |               |     |                       |       |           | Lp        | 0.093    | 0.071 | 1.31          |
|       |               |     |                       |       |           | Ap        | -0.089   | 0.071 | -1.26         |
|       |               |     |                       |       |           | Lp:Ap     | 0.006    | 0.100 | 0.06          |
| Lp*At | 0.70          | 762 | 0.003                 | 1.72  | 1.6E-01   | Intercept | 10.000   | 0.050 | <b>198.20</b> |
|       |               |     |                       |       |           | Lp        | 0.156    | 0.071 | <b>2.20</b>   |
|       |               |     |                       |       |           | At        | 0.047    | 0.071 | 0.66          |
|       |               |     |                       |       |           | Lp:At     | -0.120   | 0.101 | -1.19         |
| Lp*Ao | 0.67          | 762 | 0.079                 | 22.97 | 3.0E-14   | Intercept | 10.221   | 0.048 | <b>210.83</b> |
|       |               |     |                       |       |           | Lp        | 0.091    | 0.068 | 1.34          |
|       |               |     |                       |       |           | Ao        | -0.393   | 0.068 | <b>-5.75</b>  |
|       |               |     |                       |       |           | Lp:Ao     | 0.008    | 0.097 | 0.08          |
| Lb*Ap | 0.68          | 762 | 0.043                 | 12.47 | 5.8E-08   | Intercept | 10.221   | 0.049 | <b>206.79</b> |
|       |               |     |                       |       |           | Lb        | -0.211   | 0.070 | <b>-3.02</b>  |
|       |               |     |                       |       |           | Ap        | -0.018   | 0.070 | -0.26         |
|       |               |     |                       |       |           | Lb:Ap     | -0.138   | 0.098 | -1.41         |
| Lb*At | 0.68          | 762 | 0.054                 | 15.48 | 8.7E-10   | Intercept | 10.311   | 0.049 | <b>209.78</b> |
|       |               |     |                       |       |           | Lb        | -0.462   | 0.069 | <b>-6.66</b>  |
|       |               |     |                       |       |           | At        | -0.196   | 0.069 | <b>-2.83</b>  |
|       |               |     |                       |       |           | Lb:At     | 0.363    | 0.098 | <b>3.70</b>   |
| Lb*Ao | 0.65          | 762 | 0.129                 | 38.76 | < 2.2e-16 | Intercept | 10.489   | 0.047 | <b>222.45</b> |
|       |               |     |                       |       |           | Lb        | -0.443   | 0.067 | <b>-6.65</b>  |
|       |               |     |                       |       |           | Ao        | -0.552   | 0.067 | <b>-8.30</b>  |

|          |      |     |       |       |           |           |        |       |               |
|----------|------|-----|-------|-------|-----------|-----------|--------|-------|---------------|
|          |      |     |       |       |           | Lb:Ao     | 0.323  | 0.094 | <b>3.44</b>   |
| Ap*At    | 0.70 | 762 | 0.000 | 1.12  | 3.4E-01   | Intercept | 10.137 | 0.051 | <b>200.68</b> |
|          |      |     |       |       |           | Ap        | -0.116 | 0.071 | -1.63         |
|          |      |     |       |       |           | At        | -0.043 | 0.071 | -0.61         |
|          |      |     |       |       |           | Ap:At     | 0.059  | 0.101 | 0.58          |
| Ap*Ao    | 0.66 | 762 | 0.095 | 27.69 | < 2.2e-16 | Intercept | 10.400 | 0.048 | <b>216.34</b> |
|          |      |     |       |       |           | Ap        | -0.265 | 0.068 | <b>-3.90</b>  |
|          |      |     |       |       |           | Ao        | -0.567 | 0.068 | <b>-8.36</b>  |
|          |      |     |       |       |           | Ap:Ao     | 0.353  | 0.096 | <b>3.69</b>   |
| At*Ao    | 0.67 | 762 | 0.083 | 24.00 | 7.6E-15   | Intercept | 10.337 | 0.048 | <b>213.61</b> |
|          |      |     |       |       |           | At        | -0.139 | 0.068 | <b>-2.04</b>  |
|          |      |     |       |       |           | Ao        | -0.514 | 0.068 | <b>-7.53</b>  |
|          |      |     |       |       |           | At:Ao     | 0.248  | 0.096 | <b>2.58</b>   |
| Lp*Lb*Ap | 0.68 | 758 | 0.044 | 6.06  | 6.8E-07   | Intercept | 10.138 | 0.070 | <b>144.37</b> |
|          |      |     |       |       |           | Lp        | 0.164  | 0.099 | 1.66          |
|          |      |     |       |       |           | Lb        | -0.138 | 0.099 | -1.40         |
|          |      |     |       |       |           | Ap        | 0.028  | 0.099 | 0.29          |
|          |      |     |       |       |           | Lp:Lb     | -0.143 | 0.139 | -1.03         |
|          |      |     |       |       |           | Lp:Ap     | -0.091 | 0.139 | -0.65         |
|          |      |     |       |       |           | Lb:Ap     | -0.237 | 0.139 | -1.70         |
|          |      |     |       |       |           | Lp:Lb:Ap  | 0.195  | 0.197 | 0.99          |
| Lp*Lb*At | 0.68 | 758 | 0.056 | 7.52  | 9.1E-09   | Intercept | 10.202 | 0.070 | <b>146.20</b> |
|          |      |     |       |       |           | Lp        | 0.215  | 0.098 | <b>2.19</b>   |
|          |      |     |       |       |           | Lb        | -0.400 | 0.098 | <b>-4.08</b>  |
|          |      |     |       |       |           | At        | -0.098 | 0.098 | -1.00         |
|          |      |     |       |       |           | Lp:Lb     | -0.121 | 0.138 | -0.87         |
|          |      |     |       |       |           | Lp:At     | -0.194 | 0.138 | -1.40         |
|          |      |     |       |       |           | Lb:At     | 0.285  | 0.138 | <b>2.06</b>   |
|          |      |     |       |       |           | Lp:Lb:At  | 0.152  | 0.196 | 0.78          |
| Lp*Lb*Ao | 0.65 | 758 | 0.133 | 17.69 | < 2.2e-16 | Intercept | 10.394 | 0.067 | <b>155.35</b> |
|          |      |     |       |       |           | Lp        | 0.190  | 0.094 | <b>2.02</b>   |
|          |      |     |       |       |           | Lb        | -0.342 | 0.094 | <b>-3.63</b>  |
|          |      |     |       |       |           | Ao        | -0.477 | 0.094 | <b>-5.07</b>  |
|          |      |     |       |       |           | Lp:Lb     | -0.200 | 0.133 | -1.51         |
|          |      |     |       |       |           | Lp:Ao     | -0.148 | 0.133 | -1.12         |
|          |      |     |       |       |           | Lb:Ao     | 0.164  | 0.133 | 1.24          |
|          |      |     |       |       |           | Lp:Lb:Ao  | 0.315  | 0.188 | 1.68          |
| Lp*Ap*At | 0.69 | 758 | 0.007 | 1.74  | 9.8E-02   | Intercept | 10.011 | 0.072 | <b>139.83</b> |
|          |      |     |       |       |           | Lp        | 0.250  | 0.101 | <b>2.48</b>   |
|          |      |     |       |       |           | Ap        | -0.021 | 0.101 | -0.21         |

|          |      |     |       |       |           |           |        |       |               |
|----------|------|-----|-------|-------|-----------|-----------|--------|-------|---------------|
|          |      |     |       |       |           | At        | 0.114  | 0.101 | 1.14          |
|          |      |     |       |       |           | Lp:Ap     | -0.187 | 0.142 | -1.32         |
|          |      |     |       |       |           | Lp:At     | -0.312 | 0.142 | <b>-2.20</b>  |
|          |      |     |       |       |           | Ap:At     | -0.135 | 0.142 | -0.95         |
|          |      |     |       |       |           | Lp:Ap:At  | 0.385  | 0.201 | 1.92          |
| Lp*Ap*Ao | 0.66 | 758 | 0.096 | 12.62 | 2.3E-15   | Intercept | 10.330 | 0.068 | <b>151.26</b> |
|          |      |     |       |       |           | Lp        | 0.139  | 0.096 | 1.45          |
|          |      |     |       |       |           | Ap        | -0.215 | 0.096 | <b>-2.24</b>  |
|          |      |     |       |       |           | Ao        | -0.517 | 0.096 | <b>-5.38</b>  |
|          |      |     |       |       |           | Lp:Ap     | -0.097 | 0.136 | -0.72         |
|          |      |     |       |       |           | Lp:Ao     | -0.097 | 0.136 | -0.72         |
|          |      |     |       |       |           | Ap:Ao     | 0.246  | 0.136 | 1.82          |
|          |      |     |       |       |           | Lp:Ap:Ao  | 0.212  | 0.191 | 1.11          |
| Lp*At*Ao | 0.67 | 758 | 0.085 | 11.14 | 1.8E-13   | Intercept | 10.245 | 0.069 | <b>149.09</b> |
|          |      |     |       |       |           | Lp        | 0.182  | 0.097 | 1.89          |
|          |      |     |       |       |           | At        | -0.047 | 0.097 | -0.48         |
|          |      |     |       |       |           | Ao        | -0.484 | 0.097 | <b>-5.01</b>  |
|          |      |     |       |       |           | Lp:At     | -0.182 | 0.136 | -1.34         |
|          |      |     |       |       |           | Lp:Ao     | -0.057 | 0.136 | -0.42         |
|          |      |     |       |       |           | At:Ao     | 0.182  | 0.136 | 1.34          |
|          |      |     |       |       |           | Lp:At:Ao  | 0.130  | 0.193 | 0.68          |
| Lb*Ap*At | 0.68 | 758 | 0.056 | 7.46  | 1.1E-08   | Intercept | 10.330 | 0.070 | <b>147.99</b> |
|          |      |     |       |       |           | Lb        | -0.382 | 0.098 | <b>-3.89</b>  |
|          |      |     |       |       |           | Ap        | -0.038 | 0.098 | -0.39         |
|          |      |     |       |       |           | At        | -0.215 | 0.098 | <b>-2.19</b>  |
|          |      |     |       |       |           | Lb:Ap     | -0.160 | 0.139 | -1.15         |
|          |      |     |       |       |           | Lb:At     | 0.340  | 0.139 | <b>2.46</b>   |
|          |      |     |       |       |           | Ap:At     | 0.038  | 0.139 | 0.28          |
|          |      |     |       |       |           | Lb:Ap:At  | 0.045  | 0.196 | 0.23          |
| Lb*Ap*Ao | 0.64 | 758 | 0.149 | 20.09 | < 2.2e-16 | Intercept | 10.617 | 0.066 | <b>160.20</b> |
|          |      |     |       |       |           | Lb        | -0.430 | 0.093 | <b>-4.61</b>  |
|          |      |     |       |       |           | Ap        | -0.252 | 0.093 | <b>-2.71</b>  |
|          |      |     |       |       |           | Ao        | -0.784 | 0.093 | <b>-8.41</b>  |
|          |      |     |       |       |           | Lb:Ap     | -0.029 | 0.132 | -0.22         |
|          |      |     |       |       |           | Lb:Ao     | 0.430  | 0.132 | <b>3.27</b>   |
|          |      |     |       |       |           | Ap:Ao     | 0.461  | 0.132 | <b>3.50</b>   |
|          |      |     |       |       |           | Lb:Ap:Ao  | -0.211 | 0.186 | -1.14         |
| Lb*At*Ao | 0.64 | 758 | 0.152 | 20.53 | < 2.2e-16 | Intercept | 10.681 | 0.066 | <b>161.43</b> |
|          |      |     |       |       |           | Lb        | -0.681 | 0.093 | <b>-7.32</b>  |
|          |      |     |       |       |           | At        | -0.379 | 0.093 | <b>-4.07</b>  |

|             |      |     |       |       |           |             |        |       |               |
|-------------|------|-----|-------|-------|-----------|-------------|--------|-------|---------------|
|             |      |     |       |       |           | Ao          | -0.733 | 0.093 | <b>-7.87</b>  |
|             |      |     |       |       |           | Lb:At       | 0.473  | 0.131 | <b>3.60</b>   |
|             |      |     |       |       |           | Lb:Ao       | 0.431  | 0.131 | <b>3.28</b>   |
|             |      |     |       |       |           | At:Ao       | 0.358  | 0.131 | <b>2.73</b>   |
|             |      |     |       |       |           | Lb:At:Ao    | -0.212 | 0.185 | -1.14         |
| Ap*At*Ao    | 0.66 | 758 | 0.099 | 12.99 | 7.6E-16   | Intercept   | 10.479 | 0.068 | <b>153.67</b> |
|             |      |     |       |       |           | Ap          | -0.281 | 0.096 | <b>-2.93</b>  |
|             |      |     |       |       |           | At          | -0.156 | 0.096 | -1.62         |
|             |      |     |       |       |           | Ao          | -0.677 | 0.096 | <b>-7.05</b>  |
|             |      |     |       |       |           | Ap:At       | 0.031  | 0.135 | 0.23          |
|             |      |     |       |       |           | Ap:Ao       | 0.322  | 0.135 | <b>2.38</b>   |
|             |      |     |       |       |           | At:Ao       | 0.218  | 0.135 | 1.61          |
|             |      |     |       |       |           | Ap:At:Ao    | 0.063  | 0.191 | 0.33          |
| Lp*Lb*Ap*At | 0.68 | 750 | 0.059 | 4.22  | 1.5E-07   | Intercept   | 10.152 | 0.100 | <b>101.94</b> |
|             |      |     |       |       |           | Lp          | 0.348  | 0.139 | <b>2.50</b>   |
|             |      |     |       |       |           | Lb          | -0.277 | 0.139 | <b>-1.99</b>  |
|             |      |     |       |       |           | Ap          | 0.098  | 0.139 | 0.70          |
|             |      |     |       |       |           | At          | -0.027 | 0.139 | -0.20         |
|             |      |     |       |       |           | Lp:Lb       | -0.202 | 0.196 | -1.03         |
|             |      |     |       |       |           | Lp:Ap       | -0.264 | 0.196 | -1.35         |
|             |      |     |       |       |           | Lb:Ap       | -0.244 | 0.196 | -1.24         |
|             |      |     |       |       |           | Lp:At       | -0.369 | 0.196 | -1.88         |
|             |      |     |       |       |           | Lb:At       | 0.277  | 0.196 | 1.41          |
|             |      |     |       |       |           | Ap:At       | -0.139 | 0.196 | -0.71         |
|             |      |     |       |       |           | Lp:Lb:Ap    | 0.160  | 0.277 | 0.58          |
|             |      |     |       |       |           | Lp:Lb:At    | 0.119  | 0.277 | 0.43          |
|             |      |     |       |       |           | Lp:Ap:At    | 0.348  | 0.277 | 1.26          |
|             |      |     |       |       |           | Lb:Ap:At    | 0.014  | 0.277 | 0.05          |
|             |      |     |       |       |           | Lp:Lb:Ap:At | 0.069  | 0.391 | 0.18          |
| Lp*Lb*Ap*Ao | 0.64 | 750 | 0.151 | 10.06 | < 2.2e-16 | Intercept   | 10.457 | 0.095 | <b>110.50</b> |
|             |      |     |       |       |           | Lp          | 0.314  | 0.132 | <b>2.37</b>   |
|             |      |     |       |       |           | Lb          | -0.248 | 0.132 | -1.87         |
|             |      |     |       |       |           | Ap          | -0.123 | 0.132 | -0.93         |
|             |      |     |       |       |           | Ao          | -0.623 | 0.132 | <b>-4.71</b>  |
|             |      |     |       |       |           | Lp:Lb       | -0.356 | 0.186 | -1.91         |
|             |      |     |       |       |           | Lp:Ap       | -0.252 | 0.186 | -1.35         |
|             |      |     |       |       |           | Lb:Ap       | -0.189 | 0.186 | -1.02         |
|             |      |     |       |       |           | Lp:Ao       | -0.314 | 0.186 | -1.69         |
|             |      |     |       |       |           | Lb:Ao       | 0.207  | 0.186 | 1.11          |
|             |      |     |       |       |           | Ap:Ao       | 0.290  | 0.186 | 1.56          |

|             |      |     |       |       |           |             |        |       |               |
|-------------|------|-----|-------|-------|-----------|-------------|--------|-------|---------------|
|             |      |     |       |       |           | Lp:Lb:Ap    | 0.314  | 0.263 | 1.20          |
|             |      |     |       |       |           | Lp:Lb:Ao    | 0.439  | 0.263 | 1.67          |
|             |      |     |       |       |           | Lp:Ap:Ao    | 0.335  | 0.263 | 1.28          |
|             |      |     |       |       |           | Lb:Ap:Ao    | -0.082 | 0.263 | -0.31         |
|             |      |     |       |       |           | Lp:Lb:Ap:Ao | -0.252 | 0.371 | -0.68         |
| Lp*Lb*At*Ao | 0.64 | 750 | 0.154 | 10.31 | < 2.2e-16 | Intercept   | 10.500 | 0.094 | <b>111.20</b> |
|             |      |     |       |       |           | Lp          | 0.354  | 0.132 | <b>2.68</b>   |
|             |      |     |       |       |           | Lb          | -0.500 | 0.132 | <b>-3.78</b>  |
|             |      |     |       |       |           | At          | -0.208 | 0.132 | -1.58         |
|             |      |     |       |       |           | Ao          | -0.583 | 0.132 | <b>-4.41</b>  |
|             |      |     |       |       |           | Lp:Lb       | -0.354 | 0.186 | -1.91         |
|             |      |     |       |       |           | Lp:At       | -0.333 | 0.186 | -1.79         |
|             |      |     |       |       |           | Lb:At       | 0.313  | 0.186 | 1.68          |
|             |      |     |       |       |           | Lp:Ao       | -0.292 | 0.186 | -1.57         |
|             |      |     |       |       |           | Lb:Ao       | 0.188  | 0.186 | 1.01          |
|             |      |     |       |       |           | At:Ao       | 0.208  | 0.186 | 1.12          |
|             |      |     |       |       |           | Lp:Lb:At    | 0.313  | 0.262 | 1.19          |
|             |      |     |       |       |           | Lp:Lb:Ao    | 0.479  | 0.262 | 1.83          |
|             |      |     |       |       |           | Lp:At:Ao    | 0.292  | 0.262 | 1.11          |
|             |      |     |       |       |           | Lb:At:Ao    | -0.042 | 0.262 | -0.16         |
|             |      |     |       |       |           | Lp:Lb:At:Ao | -0.333 | 0.370 | -0.90         |
| Lp*Ap*At*Ao | 0.66 | 750 | 0.104 | 6.93  | 2.8E-14   | Intercept   | 10.283 | 0.097 | <b>105.80</b> |
|             |      |     |       |       |           | Lp          | 0.384  | 0.136 | <b>2.82</b>   |
|             |      |     |       |       |           | Ap          | -0.074 | 0.136 | -0.55         |
|             |      |     |       |       |           | At          | 0.092  | 0.136 | 0.68          |
|             |      |     |       |       |           | Ao          | -0.533 | 0.136 | <b>-3.92</b>  |
|             |      |     |       |       |           | Lp:Ap       | -0.405 | 0.191 | <b>-2.12</b>  |
|             |      |     |       |       |           | Lp:At       | -0.488 | 0.191 | <b>-2.55</b>  |
|             |      |     |       |       |           | Ap:At       | -0.280 | 0.191 | -1.46         |
|             |      |     |       |       |           | Lp:Ao       | -0.280 | 0.191 | -1.46         |
|             |      |     |       |       |           | Ap:Ao       | 0.095  | 0.191 | 0.50          |
|             |      |     |       |       |           | At:Ao       | 0.033  | 0.191 | 0.17          |
|             |      |     |       |       |           | Lp:Ap:At    | 0.613  | 0.270 | <b>2.27</b>   |
|             |      |     |       |       |           | Lp:Ap:Ao    | 0.447  | 0.270 | 1.66          |
|             |      |     |       |       |           | Lp:At:Ao    | 0.363  | 0.270 | 1.35          |
|             |      |     |       |       |           | Ap:At:Ao    | 0.301  | 0.270 | 1.11          |
|             |      |     |       |       |           | Lp:Ap:At:Ao | -0.467 | 0.381 | -1.23         |
| Lb*Ap*At*Ao | 0.64 | 750 | 0.168 | 11.32 | < 2.2e-16 | Intercept   | 10.826 | 0.094 | <b>115.61</b> |
|             |      |     |       |       |           | Lb          | -0.680 | 0.131 | <b>-5.19</b>  |
|             |      |     |       |       |           | Ap          | -0.284 | 0.131 | <b>-2.17</b>  |

|                |      |     |       |      |           |             |        |       |              |
|----------------|------|-----|-------|------|-----------|-------------|--------|-------|--------------|
|                |      |     |       |      |           | At          | -0.409 | 0.131 | <b>-3.12</b> |
|                |      |     |       |      |           | Ao          | -0.972 | 0.131 | <b>-7.42</b> |
|                |      |     |       |      |           | Lb:Ap       | -0.007 | 0.184 | -0.04        |
|                |      |     |       |      |           | Lb:At       | 0.493  | 0.184 | <b>2.67</b>  |
|                |      |     |       |      |           | Ap:At       | 0.055  | 0.184 | 0.30         |
|                |      |     |       |      |           | Lb:Ao       | 0.576  | 0.184 | <b>3.13</b>  |
|                |      |     |       |      |           | Ap:Ao       | 0.472  | 0.184 | <b>2.56</b>  |
|                |      |     |       |      |           | At:Ao       | 0.368  | 0.184 | <b>2.00</b>  |
|                |      |     |       |      |           | Lb:Ap:At    | -0.034 | 0.260 | -0.13        |
|                |      |     |       |      |           | Lb:Ap:Ao    | -0.284 | 0.260 | -1.09        |
|                |      |     |       |      |           | Lb:At:Ao    | -0.284 | 0.260 | -1.09        |
|                |      |     |       |      |           | Ap:At:Ao    | -0.014 | 0.260 | -0.05        |
|                |      |     |       |      |           | Lb:Ap:At:Ao | 0.139  | 0.367 | 0.38         |
| Lp*Lb*Ap*At*Ao | 0.63 | 734 | 0.176 | 6.27 | < 2.2e-16 | Intercept   | 10.455 | 0.135 | <b>77.56</b> |
|                |      |     |       |      |           | Lp          | 0.712  | 0.187 | <b>3.82</b>  |
|                |      |     |       |      |           | Lb          | -0.330 | 0.187 | -1.77        |
|                |      |     |       |      |           | Ap          | 0.087  | 0.187 | 0.47         |
|                |      |     |       |      |           | At          | 0.004  | 0.187 | 0.02         |
|                |      |     |       |      |           | Ao          | -0.580 | 0.187 | <b>-3.11</b> |
|                |      |     |       |      |           | Lp:Lb       | -0.670 | 0.261 | <b>-2.57</b> |
|                |      |     |       |      |           | Lp:Ap       | -0.712 | 0.261 | <b>-2.73</b> |
|                |      |     |       |      |           | Lb:Ap       | -0.337 | 0.261 | -1.29        |
|                |      |     |       |      |           | Lp:At       | -0.795 | 0.261 | <b>-3.05</b> |
|                |      |     |       |      |           | Lb:At       | 0.163  | 0.261 | 0.62         |
|                |      |     |       |      |           | Ap:At       | -0.420 | 0.261 | -1.61        |
|                |      |     |       |      |           | Lp:Ao       | -0.754 | 0.261 | <b>-2.89</b> |
|                |      |     |       |      |           | Lb:Ao       | 0.080  | 0.261 | 0.31         |
|                |      |     |       |      |           | Ap:Ao       | -0.004 | 0.261 | -0.02        |
|                |      |     |       |      |           | At:Ao       | -0.087 | 0.261 | -0.33        |
|                |      |     |       |      |           | Lp:Lb:Ap    | 0.629  | 0.367 | 1.71         |
|                |      |     |       |      |           | Lp:Lb:At    | 0.629  | 0.367 | 1.71         |
|                |      |     |       |      |           | Lp:Ap:At    | 0.920  | 0.367 | <b>2.51</b>  |
|                |      |     |       |      |           | Lb:Ap:At    | 0.295  | 0.367 | 0.81         |
|                |      |     |       |      |           | Lp:Lb:Ao    | 0.962  | 0.367 | <b>2.62</b>  |
|                |      |     |       |      |           | Lp:Ap:Ao    | 0.920  | 0.367 | <b>2.51</b>  |
|                |      |     |       |      |           | Lb:Ap:Ao    | 0.212  | 0.367 | 0.58         |
|                |      |     |       |      |           | Lp:At:Ao    | 0.879  | 0.367 | <b>2.39</b>  |
|                |      |     |       |      |           | Lb:At:Ao    | 0.254  | 0.367 | 0.69         |
|                |      |     |       |      |           | Ap:At:Ao    | 0.587  | 0.367 | 1.60         |
|                |      |     |       |      |           | Lp:Lb:Ap:At | -0.629 | 0.518 | -1.22        |

|                |        |       |              |
|----------------|--------|-------|--------------|
| Lp:Lb:Ap:Ao    | -0.962 | 0.518 | -1.86        |
| Lp:Lb:At:Ao    | -1.045 | 0.518 | <b>-2.02</b> |
| Lp:Ap:At:Ao    | -1.170 | 0.518 | <b>-2.26</b> |
| Lb:Ap:At:Ao    | -0.587 | 0.518 | -1.13        |
| Lp:Lb:Ap:At:Ao | 1.420  | 0.731 | 1.94         |



**Table S4: Multivariate linear regression analysis of lifespan data to calculate interactions**

| Model | SE (residual) | DF   | R <sup>2</sup> (adj.) | F     | P         | Parameter | Estimate | SE   | t             |
|-------|---------------|------|-----------------------|-------|-----------|-----------|----------|------|---------------|
| Lp    | 12.26         | 3158 | 0.004                 | 14.96 | 1.1E-04   | Intercept | 47.62    | 0.31 | <b>153.45</b> |
|       |               |      |                       |       |           | Lp        | -1.69    | 0.44 | <b>-3.87</b>  |
| Lb    | 12.28         | 3158 | 0.001                 | 2.91  | 8.8E-02   | Intercept | 47.14    | 0.31 | <b>152.58</b> |
|       |               |      |                       |       |           | Lb        | -0.75    | 0.44 | -1.71         |
| Ap    | 12.27         | 3158 | 0.003                 | 10.08 | 1.5E-03   | Intercept | 46.06    | 0.31 | <b>148.32</b> |
|       |               |      |                       |       |           | Ap        | 1.39     | 0.44 | <b>3.18</b>   |
| At    | 12.22         | 3158 | 0.011                 | 35.69 | 2.6E-09   | Intercept | 48.08    | 0.31 | <b>155.44</b> |
|       |               |      |                       |       |           | At        | -2.60    | 0.43 | <b>-5.97</b>  |
| Ao    | 12.17         | 3158 | 0.019                 | 60.59 | 9.5E-15   | Intercept | 48.47    | 0.31 | <b>157.32</b> |
|       |               |      |                       |       |           | Ao        | -3.37    | 0.43 | <b>-7.78</b>  |
| Lp*Lb | 12.24         | 3156 | 0.008                 | 9.37  | 3.6E-06   | Intercept | 48.70    | 0.44 | <b>111.15</b> |
|       |               |      |                       |       |           | Lp        | -3.07    | 0.62 | <b>-4.99</b>  |
|       |               |      |                       |       |           | Lb        | -2.15    | 0.62 | <b>-3.47</b>  |
|       |               |      |                       |       |           | Lp:Lb     | 2.78     | 0.87 | <b>3.19</b>   |
| Lp*Ap | 12.24         | 3156 | 0.007                 | 8.27  | 1.8E-05   | Intercept | 46.91    | 0.44 | <b>105.65</b> |
|       |               |      |                       |       |           | Lp        | -1.66    | 0.62 | <b>-2.67</b>  |
|       |               |      |                       |       |           | Ap        | 1.38     | 0.62 | <b>2.22</b>   |
|       |               |      |                       |       |           | Lp:Ap     | -0.02    | 0.87 | -0.03         |
| Lp*At | 12.19         | 3156 | 0.015                 | 17.30 | 3.8E-11   | Intercept | 49.09    | 0.44 | <b>111.02</b> |
|       |               |      |                       |       |           | Lp        | -1.97    | 0.62 | <b>-3.19</b>  |
|       |               |      |                       |       |           | At        | -2.87    | 0.62 | <b>-4.65</b>  |
|       |               |      |                       |       |           | Lp:At     | 0.49     | 0.87 | 0.57          |
| Lp*Ao | 12.14         | 3156 | 0.023                 | 25.69 | < 2.2e-16 | Intercept | 49.46    | 0.44 | <b>112.28</b> |
|       |               |      |                       |       |           | Lp        | -1.92    | 0.62 | <b>-3.12</b>  |
|       |               |      |                       |       |           | Ao        | -3.58    | 0.62 | <b>-5.82</b>  |
|       |               |      |                       |       |           | Lp:Ao     | 0.37     | 0.86 | 0.43          |
| Lb*Ap | 12.24         | 3156 | 0.007                 | 8.40  | 1.5E-05   | Intercept | 45.67    | 0.44 | <b>104.20</b> |
|       |               |      |                       |       |           | Lb        | 0.79     | 0.62 | 1.28          |
|       |               |      |                       |       |           | Ap        | 2.90     | 0.62 | <b>4.71</b>   |
|       |               |      |                       |       |           | Lb:Ap     | -3.03    | 0.87 | <b>-3.48</b>  |
| Lb*At | 12.20         | 3156 | 0.013                 | 14.92 | 1.2E-09   | Intercept | 47.91    | 0.44 | <b>109.65</b> |
|       |               |      |                       |       |           | Lb        | 0.33     | 0.62 | 0.54          |
|       |               |      |                       |       |           | At        | -1.53    | 0.61 | <b>-2.49</b>  |
|       |               |      |                       |       |           | Lb:At     | -2.13    | 0.87 | <b>-2.46</b>  |
| Lb*Ao | 12.16         | 3156 | 0.020                 | 22.40 | 2.4E-14   | Intercept | 49.26    | 0.44 | <b>113.12</b> |
|       |               |      |                       |       |           | Lb        | -1.57    | 0.62 | <b>-2.55</b>  |
|       |               |      |                       |       |           | Ao        | -4.19    | 0.61 | <b>-6.84</b>  |

|          |       |      |       |       |           |           |       |      |               |
|----------|-------|------|-------|-------|-----------|-----------|-------|------|---------------|
|          |       |      |       |       |           | Lb:Ao     | 1.63  | 0.87 | 1.89          |
| Ap*At    | 12.20 | 3156 | 0.014 | 15.54 | 4.9E-10   | Intercept | 47.15 | 0.44 | <b>106.54</b> |
|          |       |      |       |       |           | Ap        | 1.82  | 0.62 | <b>2.94</b>   |
|          |       |      |       |       |           | At        | -2.11 | 0.62 | <b>-3.42</b>  |
|          |       |      |       |       |           | Ap:At     | -0.92 | 0.87 | -1.06         |
| Ap*Ao    | 12.15 | 3156 | 0.022 | 24.94 | 6.1E-16   | Intercept | 48.25 | 0.44 | <b>109.51</b> |
|          |       |      |       |       |           | Ap        | 0.43  | 0.62 | 0.70          |
|          |       |      |       |       |           | Ao        | -4.27 | 0.62 | <b>-6.93</b>  |
|          |       |      |       |       |           | Ap:Ao     | 1.80  | 0.86 | <b>2.09</b>   |
| At*Ao    | 12.09 | 3156 | 0.031 | 34.58 | < 2.2e-16 | Intercept | 50.31 | 0.44 | <b>114.70</b> |
|          |       |      |       |       |           | At        | -3.59 | 0.61 | <b>-5.86</b>  |
|          |       |      |       |       |           | Ao        | -4.35 | 0.61 | <b>-7.11</b>  |
|          |       |      |       |       |           | At:Ao     | 1.87  | 0.86 | <b>2.17</b>   |
| Lp*Lb*Ap | 12.19 | 3152 | 0.015 | 7.83  | 2.0E-09   | Intercept | 46.73 | 0.63 | <b>74.72</b>  |
|          |       |      |       |       |           | Lp        | -2.08 | 0.87 | <b>-2.38</b>  |
|          |       |      |       |       |           | Lb        | 0.36  | 0.88 | 0.41          |
|          |       |      |       |       |           | Ap        | 3.83  | 0.87 | <b>4.38</b>   |
|          |       |      |       |       |           | Lp:Lb     | 0.84  | 1.24 | 0.68          |
|          |       |      |       |       |           | Lp:Ap     | -1.90 | 1.23 | -1.55         |
|          |       |      |       |       |           | Lb:Ap     | -4.90 | 1.24 | <b>-3.97</b>  |
|          |       |      |       |       |           | Lp:Lb:Ap  | 3.75  | 1.74 | <b>2.16</b>   |
| Lp*Lb*At | 12.16 | 3152 | 0.020 | 10.20 | 1.1E-12   | Intercept | 49.55 | 0.62 | <b>79.43</b>  |
|          |       |      |       |       |           | Lp        | -3.19 | 0.87 | <b>-3.66</b>  |
|          |       |      |       |       |           | Lb        | -0.92 | 0.88 | -1.04         |
|          |       |      |       |       |           | At        | -1.67 | 0.87 | -1.91         |
|          |       |      |       |       |           | Lp:Lb     | 2.44  | 1.23 | <b>1.98</b>   |
|          |       |      |       |       |           | Lp:At     | 0.19  | 1.22 | 0.15          |
|          |       |      |       |       |           | Lb:At     | -2.41 | 1.23 | -1.96         |
|          |       |      |       |       |           | Lp:Lb:At  | 0.61  | 1.73 | 0.36          |
| Lp*Lb*Ao | 12.12 | 3152 | 0.027 | 13.61 | < 2.2e-16 | Intercept | 50.77 | 0.62 | <b>81.68</b>  |
|          |       |      |       |       |           | Lp        | -2.94 | 0.87 | <b>-3.39</b>  |
|          |       |      |       |       |           | Lb        | -2.62 | 0.88 | <b>-2.98</b>  |
|          |       |      |       |       |           | Ao        | -4.04 | 0.87 | <b>-4.65</b>  |
|          |       |      |       |       |           | Lp:Lb     | 2.04  | 1.23 | 1.66          |
|          |       |      |       |       |           | Lp:Ao     | -0.38 | 1.22 | -0.31         |
|          |       |      |       |       |           | Lb:Ao     | 0.91  | 1.23 | 0.74          |
|          |       |      |       |       |           | Lp:Lb:Ao  | 1.49  | 1.72 | 0.87          |
| Lp*Ap*At | 12.18 | 3152 | 0.018 | 9.07  | 4.0E-11   | Intercept | 48.41 | 0.64 | <b>75.44</b>  |
|          |       |      |       |       |           | Lp        | -2.40 | 0.88 | <b>-2.72</b>  |
|          |       |      |       |       |           | Ap        | 1.29  | 0.88 | 1.46          |

|          |       |      |       |       |           |           |       |      |              |
|----------|-------|------|-------|-------|-----------|-----------|-------|------|--------------|
|          |       |      |       |       |           | At        | -2.85 | 0.88 | <b>-3.22</b> |
|          |       |      |       |       |           | Lp:Ap     | 0.93  | 1.23 | 0.76         |
|          |       |      |       |       |           | Lp:At     | 1.34  | 1.23 | 1.09         |
|          |       |      |       |       |           | Ap:At     | 0.03  | 1.23 | 0.02         |
|          |       |      |       |       |           | Lp:Ap:At  | -1.77 | 1.73 | -1.02        |
| Lp*Ap*Ao | 12.12 | 3152 | 0.026 | 13.14 | < 2.2e-16 | Intercept | 49.47 | 0.64 | <b>77.43</b> |
|          |       |      |       |       |           | Lp        | -2.32 | 0.88 | <b>-2.63</b> |
|          |       |      |       |       |           | Ap        | -0.03 | 0.88 | -0.03        |
|          |       |      |       |       |           | Ao        | -4.86 | 0.88 | <b>-5.52</b> |
|          |       |      |       |       |           | Lp:Ap     | 0.80  | 1.23 | 0.65         |
|          |       |      |       |       |           | Lp:Ao     | 1.06  | 1.23 | 0.87         |
|          |       |      |       |       |           | Ap:Ao     | 2.56  | 1.23 | <b>2.08</b>  |
|          |       |      |       |       |           | Lp:Ap:Ao  | -1.39 | 1.73 | -0.80        |
| Lp*At*Ao | 12.06 | 3152 | 0.036 | 17.68 | < 2.2e-16 | Intercept | 51.83 | 0.64 | <b>81.52</b> |
|          |       |      |       |       |           | Lp        | -2.88 | 0.88 | <b>-3.29</b> |
|          |       |      |       |       |           | At        | -4.51 | 0.88 | <b>-5.15</b> |
|          |       |      |       |       |           | Ao        | -5.20 | 0.88 | <b>-5.94</b> |
|          |       |      |       |       |           | Lp:At     | 1.69  | 1.22 | 1.38         |
|          |       |      |       |       |           | Lp:Ao     | 1.55  | 1.22 | 1.27         |
|          |       |      |       |       |           | At:Ao     | 3.01  | 1.22 | <b>2.46</b>  |
|          |       |      |       |       |           | Lp:At:Ao  | -2.12 | 1.72 | -1.24        |
| Lb*Ap*At | 12.17 | 3152 | 0.019 | 9.80  | 3.9E-12   | Intercept | 46.29 | 0.62 | <b>74.17</b> |
|          |       |      |       |       |           | Lb        | 1.72  | 0.88 | 1.95         |
|          |       |      |       |       |           | Ap        | 3.17  | 0.87 | <b>3.64</b>  |
|          |       |      |       |       |           | At        | -1.20 | 0.87 | -1.38        |
|          |       |      |       |       |           | Lb:Ap     | -2.71 | 1.23 | <b>-2.20</b> |
|          |       |      |       |       |           | Lb:At     | -1.82 | 1.23 | -1.48        |
|          |       |      |       |       |           | Ap:At     | -0.57 | 1.22 | -0.47        |
|          |       |      |       |       |           | Lb:Ap:At  | -0.70 | 1.73 | -0.40        |
| Lb*Ap*Ao | 12.11 | 3152 | 0.028 | 14.18 | < 2.2e-16 | Intercept | 48.77 | 0.62 | <b>78.52</b> |
|          |       |      |       |       |           | Lb        | -1.04 | 0.88 | -1.19        |
|          |       |      |       |       |           | Ap        | 0.95  | 0.87 | 1.09         |
|          |       |      |       |       |           | Ao        | -6.05 | 0.87 | <b>-6.98</b> |
|          |       |      |       |       |           | Lb:Ap     | -1.03 | 1.23 | -0.84        |
|          |       |      |       |       |           | Lb:Ao     | 3.57  | 1.23 | <b>2.91</b>  |
|          |       |      |       |       |           | Ap:Ao     | 3.76  | 1.22 | <b>3.08</b>  |
|          |       |      |       |       |           | Lb:Ap:Ao  | -3.91 | 1.72 | <b>-2.27</b> |
| Lb*At*Ao | 12.07 | 3152 | 0.035 | 17.39 | < 2.2e-16 | Intercept | 50.07 | 0.62 | <b>80.88</b> |
|          |       |      |       |       |           | Lb        | 0.49  | 0.88 | 0.57         |
|          |       |      |       |       |           | At        | -1.57 | 0.86 | -1.82        |

|             |       |      |       |       |           |             |       |      |              |
|-------------|-------|------|-------|-------|-----------|-------------|-------|------|--------------|
|             |       |      |       |       |           | Ao          | -4.20 | 0.86 | <b>-4.85</b> |
|             |       |      |       |       |           | Lb:At       | -4.03 | 1.22 | <b>-3.30</b> |
|             |       |      |       |       |           | Lb:Ao       | -0.31 | 1.22 | -0.26        |
|             |       |      |       |       |           | At:Ao       | -0.02 | 1.21 | -0.02        |
|             |       |      |       |       |           | Lb:At:Ao    | 3.78  | 1.72 | <b>2.20</b>  |
| Ap*At*Ao    | 12.06 | 3152 | 0.036 | 17.87 | < 2.2e-16 | Intercept   | 50.50 | 0.64 | <b>79.45</b> |
|             |       |      |       |       |           | Ap          | -0.36 | 0.88 | -0.41        |
|             |       |      |       |       |           | At          | -4.27 | 0.88 | <b>-4.87</b> |
|             |       |      |       |       |           | Ao          | -6.37 | 0.88 | <b>-7.27</b> |
|             |       |      |       |       |           | Ap:At       | 1.35  | 1.22 | 1.10         |
|             |       |      |       |       |           | Ap:Ao       | 4.01  | 1.22 | <b>3.28</b>  |
|             |       |      |       |       |           | At:Ao       | 3.98  | 1.22 | <b>3.25</b>  |
|             |       |      |       |       |           | Ap:At:Ao    | -4.20 | 1.72 | <b>-2.44</b> |
| Lp*Lb*Ap*At | 12.12 | 3144 | 0.026 | 6.72  | 1.6E-14   | Intercept   | 47.64 | 0.90 | <b>52.74</b> |
|             |       |      |       |       |           | Lp          | -2.58 | 1.25 | <b>-2.07</b> |
|             |       |      |       |       |           | Lb          | 1.54  | 1.28 | 1.20         |
|             |       |      |       |       |           | Ap          | 3.62  | 1.25 | <b>2.91</b>  |
|             |       |      |       |       |           | At          | -1.73 | 1.25 | -1.39        |
|             |       |      |       |       |           | Lp:Lb       | 0.35  | 1.76 | 0.20         |
|             |       |      |       |       |           | Lp:Ap       | -1.03 | 1.74 | -0.59        |
|             |       |      |       |       |           | Lb:Ap       | -4.66 | 1.76 | <b>-2.65</b> |
|             |       |      |       |       |           | Lp:At       | 0.91  | 1.74 | 0.53         |
|             |       |      |       |       |           | Lb:At       | -2.24 | 1.76 | -1.27        |
|             |       |      |       |       |           | Ap:At       | 0.32  | 1.74 | 0.18         |
|             |       |      |       |       |           | Lp:Lb:Ap    | 3.93  | 2.46 | 1.60         |
|             |       |      |       |       |           | Lp:Lb:At    | 0.86  | 2.46 | 0.35         |
|             |       |      |       |       |           | Lp:Ap:At    | -1.64 | 2.44 | -0.67        |
|             |       |      |       |       |           | Lb:Ap:At    | -0.59 | 2.46 | -0.24        |
|             |       |      |       |       |           | Lp:Lb:Ap:At | -0.24 | 3.45 | -0.07        |
| Lp*Lb*Ap*Ao | 12.05 | 3144 | 0.037 | 9.14  | < 2.2e-16 | Intercept   | 50.50 | 0.90 | <b>56.21</b> |
|             |       |      |       |       |           | Lp          | -3.28 | 1.24 | <b>-2.65</b> |
|             |       |      |       |       |           | Lb          | -2.06 | 1.27 | -1.62        |
|             |       |      |       |       |           | Ap          | 0.51  | 1.24 | 0.41         |
|             |       |      |       |       |           | Ao          | -7.16 | 1.24 | <b>-5.78</b> |
|             |       |      |       |       |           | Lp:Lb       | 1.93  | 1.75 | 1.10         |
|             |       |      |       |       |           | Lp:Ap       | 0.71  | 1.73 | 0.41         |
|             |       |      |       |       |           | Lb:Ap       | -1.07 | 1.75 | -0.61        |
|             |       |      |       |       |           | Lp:Ao       | 2.03  | 1.73 | 1.18         |
|             |       |      |       |       |           | Lb:Ao       | 4.59  | 1.75 | <b>2.62</b>  |
|             |       |      |       |       |           | Ap:Ao       | 6.27  | 1.73 | <b>3.63</b>  |

|             |       |      |       |       |           |             |       |      |              |
|-------------|-------|------|-------|-------|-----------|-------------|-------|------|--------------|
|             |       |      |       |       |           | Lp:Lb:Ap    | 0.17  | 2.44 | 0.07         |
|             |       |      |       |       |           | Lp:Lb:Ao    | -1.93 | 2.44 | -0.79        |
|             |       |      |       |       |           | Lp:Ap:Ao    | -4.84 | 2.43 | <b>-1.99</b> |
|             |       |      |       |       |           | Lb:Ap:Ao    | -7.42 | 2.44 | <b>-3.03</b> |
|             |       |      |       |       |           | Lp:Lb:Ap:Ao | 6.91  | 3.43 | <b>2.01</b>  |
| Lp*Lb*At*Ao | 12.01 | 3144 | 0.044 | 10.64 | < 2.2e-16 | Intercept   | 52.57 | 0.90 | <b>58.71</b> |
|             |       |      |       |       |           | Lp          | -4.75 | 1.23 | <b>-3.85</b> |
|             |       |      |       |       |           | Lb          | -1.47 | 1.27 | -1.16        |
|             |       |      |       |       |           | At          | -3.42 | 1.23 | <b>-2.77</b> |
|             |       |      |       |       |           | Ao          | -5.73 | 1.23 | <b>-4.64</b> |
|             |       |      |       |       |           | Lp:Lb       | 3.74  | 1.75 | <b>2.14</b>  |
|             |       |      |       |       |           | Lp:At       | 3.45  | 1.72 | <b>2.00</b>  |
|             |       |      |       |       |           | Lb:At       | -2.18 | 1.75 | -1.25        |
|             |       |      |       |       |           | Lp:Ao       | 2.82  | 1.72 | 1.64         |
|             |       |      |       |       |           | Lb:Ao       | 1.06  | 1.75 | 0.61         |
|             |       |      |       |       |           | At:Ao       | 3.21  | 1.72 | 1.87         |
|             |       |      |       |       |           | Lp:Lb:At    | -3.51 | 2.44 | -1.44        |
|             |       |      |       |       |           | Lp:Lb:Ao    | -2.54 | 2.44 | -1.04        |
|             |       |      |       |       |           | Lp:At:Ao    | -6.22 | 2.42 | <b>-2.57</b> |
|             |       |      |       |       |           | Lb:At:Ao    | -0.41 | 2.44 | -0.17        |
|             |       |      |       |       |           | Lp:Lb:At:Ao | 8.19  | 3.42 | <b>2.39</b>  |
| Lp*Ap*At*Ao | 12.03 | 3144 | 0.040 | 9.88  | < 2.2e-16 | Intercept   | 52.71 | 0.95 | <b>55.41</b> |
|             |       |      |       |       |           | Lp          | -3.98 | 1.28 | <b>-3.12</b> |
|             |       |      |       |       |           | Ap          | -1.59 | 1.28 | -1.24        |
|             |       |      |       |       |           | At          | -5.83 | 1.28 | <b>-4.57</b> |
|             |       |      |       |       |           | Ao          | -7.74 | 1.28 | <b>-6.06</b> |
|             |       |      |       |       |           | Lp:Ap       | 2.02  | 1.75 | 1.15         |
|             |       |      |       |       |           | Lp:At       | 2.68  | 1.75 | 1.53         |
|             |       |      |       |       |           | Ap:At       | 2.47  | 1.75 | 1.41         |
|             |       |      |       |       |           | Lp:Ao       | 2.30  | 1.75 | 1.31         |
|             |       |      |       |       |           | Ap:Ao       | 4.89  | 1.75 | <b>2.79</b>  |
|             |       |      |       |       |           | At:Ao       | 5.11  | 1.75 | <b>2.91</b>  |
|             |       |      |       |       |           | Lp:Ap:At    | -1.80 | 2.44 | -0.74        |
|             |       |      |       |       |           | Lp:Ap:Ao    | -1.32 | 2.44 | -0.54        |
|             |       |      |       |       |           | Lp:At:Ao    | -1.82 | 2.44 | -0.74        |
|             |       |      |       |       |           | Ap:At:Ao    | -4.02 | 2.44 | -1.65        |
|             |       |      |       |       |           | Lp:Ap:At:Ao | -0.79 | 3.43 | -0.23        |
| Lb*Ap*At*Ao | 12.00 | 3144 | 0.046 | 11.08 | < 2.2e-16 | Intercept   | 49.58 | 0.89 | <b>55.43</b> |
|             |       |      |       |       |           | Lb          | 1.83  | 1.26 | 1.45         |
|             |       |      |       |       |           | Ap          | 0.92  | 1.23 | 0.74         |

|             |       |      |              |
|-------------|-------|------|--------------|
| At          | -1.54 | 1.23 | -1.25        |
| Ao          | -6.26 | 1.23 | <b>-5.08</b> |
| Lb:Ap       | -2.54 | 1.74 | -1.46        |
| Lb:At       | -5.46 | 1.74 | <b>-3.13</b> |
| Ap:At       | -0.02 | 1.72 | -0.01        |
| Lb:Ao       | -0.21 | 1.74 | -0.12        |
| Ap:Ao       | 4.18  | 1.72 | <b>2.43</b>  |
| At:Ao       | 0.34  | 1.72 | <b>0.20</b>  |
| Lb:Ap:At    | 2.73  | 2.43 | 1.12         |
| Lb:Ap:Ao    | -0.34 | 2.43 | -0.14        |
| Lb:At:Ao    | 7.28  | 2.43 | <b>2.99</b>  |
| Ap:At:Ao    | -0.77 | 2.42 | -0.32        |
| Lb:Ap:At:Ao | -6.85 | 3.42 | <b>-2.01</b> |

|                |       |      |       |      |           |             |        |      |              |
|----------------|-------|------|-------|------|-----------|-------------|--------|------|--------------|
| Lp*Lb*Ap*At*Ao | 11.93 | 3128 | 0.057 | 7.12 | < 2.2e-16 | Intercept   | 53.25  | 1.33 | <b>39.92</b> |
| Lp             |       |      |       |      |           | Lp          | -6.60  | 1.79 | <b>-3.69</b> |
| Lb             |       |      |       |      |           | Lb          | -1.08  | 1.89 | -0.57        |
| Ap             |       |      |       |      |           | Ap          | -1.23  | 1.79 | -0.69        |
| At             |       |      |       |      |           | At          | -4.95  | 1.79 | <b>-2.77</b> |
| Ao             |       |      |       |      |           | Ao          | -10.09 | 1.79 | <b>-5.64</b> |
| Lp:Lb          |       |      |       |      |           | Lp:Lb       | 5.24   | 2.53 | <b>2.07</b>  |
| Lp:Ap          |       |      |       |      |           | Lp:Ap       | 3.56   | 2.46 | 1.45         |
| Lb:Ap          |       |      |       |      |           | Lb:Ap       | -0.72  | 2.53 | -0.28        |
| Lp:At          |       |      |       |      |           | Lp:At       | 6.09   | 2.46 | <b>2.48</b>  |
| Lb:At          |       |      |       |      |           | Lb:At       | -1.77  | 2.53 | -0.70        |
| Ap:At          |       |      |       |      |           | Ap:At       | 2.92   | 2.46 | 1.19         |
| Lp:Ao          |       |      |       |      |           | Lp:Ao       | 6.92   | 2.46 | <b>2.81</b>  |
| Lb:Ao          |       |      |       |      |           | Lb:Ao       | 4.71   | 2.53 | 1.86         |
| Ap:Ao          |       |      |       |      |           | Ap:Ao       | 8.58   | 2.46 | <b>3.49</b>  |
| At:Ao          |       |      |       |      |           | At:Ao       | 5.32   | 2.46 | <b>2.16</b>  |
| Lp:Lb:Ap       |       |      |       |      |           | Lp:Lb:Ap    | -3.08  | 3.48 | -0.88        |
| Lp:Lb:At       |       |      |       |      |           | Lp:Lb:At    | -6.82  | 3.48 | -1.96        |
| Lp:Ap:At       |       |      |       |      |           | Lp:Ap:At    | -5.15  | 3.43 | -1.50        |
| Lb:Ap:At       |       |      |       |      |           | Lb:Ap:At    | -0.91  | 3.48 | -0.26        |
| Lp:Lb:Ao       |       |      |       |      |           | Lp:Lb:Ao    | -9.25  | 3.48 | <b>-2.66</b> |
| Lp:Ap:Ao       |       |      |       |      |           | Lp:Ap:Ao    | -8.06  | 3.43 | <b>-2.35</b> |
| Lb:Ap:Ao       |       |      |       |      |           | Lb:Ap:Ao    | -7.38  | 3.48 | <b>-2.12</b> |
| Lp:At:Ao       |       |      |       |      |           | Lp:At:Ao    | -9.23  | 3.43 | <b>-2.69</b> |
| Lb:At:Ao       |       |      |       |      |           | Lb:At:Ao    | -0.43  | 3.48 | -0.12        |
| Ap:At:Ao       |       |      |       |      |           | Ap:At:Ao    | -4.08  | 3.43 | -1.19        |
| Lp:Lb:Ap:At    |       |      |       |      |           | Lp:Lb:Ap:At | 6.70   | 4.85 | 1.38         |

|                |        |      |              |
|----------------|--------|------|--------------|
| Lp:Lb:Ap:Ao    | 13.49  | 4.85 | <b>2.78</b>  |
| Lp:Lb:At:Ao    | 14.83  | 4.85 | <b>3.06</b>  |
| Lp:Ap:At:Ao    | 5.89   | 4.81 | 1.23         |
| Lb:Ap:At:Ao    | 0.12   | 4.85 | 0.02         |
| Lp:Lb:Ap:At:Ao | -13.36 | 6.80 | <b>-1.96</b> |

**Table S5: Multivariate linear regression analysis of bacterial abundance data to calculate interactions**

| Model | SE (residual) | DF   | R <sup>2</sup> (adj.) | F      | P         | Parameter | Estimate | SE    | t            |
|-------|---------------|------|-----------------------|--------|-----------|-----------|----------|-------|--------------|
| Lp    | 395300        | 1534 | 0.029                 | 46.42  | 1.4E-11   | Intercept | 423858   | 14265 | <b>29.71</b> |
|       |               |      |                       |        |           | Lp        | 137451   | 20173 | <b>6.81</b>  |
| Lb    | 383300        | 1534 | 0.087                 | 147.40 | < 2.2E-16 | Intercept | 373869   | 13830 | <b>27.03</b> |
|       |               |      |                       |        |           | Lb        | 237429   | 19558 | <b>12.14</b> |
| Ap    | 400800        | 1534 | 0.001                 | 3.29   | 7.0E-02   | Intercept | 474039   | 14464 | <b>32.78</b> |
|       |               |      |                       |        |           | Ap        | 37089    | 20454 | 1.81         |
| At    | 399200        | 1534 | 0.010                 | 16.19  | 6.0E-05   | Intercept | 451600   | 14403 | <b>31.35</b> |
|       |               |      |                       |        |           | At        | 81966    | 20369 | <b>4.02</b>  |
| Ao    | 396500        | 1534 | 0.023                 | 36.87  | 1.6E-09   | Intercept | 431150   | 14308 | <b>30.13</b> |
|       |               |      |                       |        |           | Ao        | 122866   | 20235 | <b>6.07</b>  |
| Lp*Lb | 368900        | 1532 | 0.154                 | 94.14  | < 2.2E-16 | Intercept | 226321   | 18828 | <b>12.02</b> |
|       |               |      |                       |        |           | Lp        | 295096   | 26626 | <b>11.08</b> |
|       |               |      |                       |        |           | Lb        | 395074   | 26626 | <b>14.84</b> |
|       |               |      |                       |        |           | Lp:Lb     | -315290  | 37655 | <b>-8.37</b> |
| Lp*Ap | 394700        | 1532 | 0.032                 | 17.91  | 2.0E-11   | Intercept | 424810   | 20140 | <b>21.09</b> |
|       |               |      |                       |        |           | Lp        | 98457    | 28482 | <b>3.46</b>  |
|       |               |      |                       |        |           | Ap        | -1905    | 28482 | -0.07        |
|       |               |      |                       |        |           | Lp:Ap     | 77988    | 40280 | 1.94         |
| Lp*At | 393400        | 1532 | 0.038                 | 21.18  | 1.9E-13   | Intercept | 383628   | 20078 | <b>19.11</b> |
|       |               |      |                       |        |           | Lp        | 135944   | 28394 | <b>4.79</b>  |
|       |               |      |                       |        |           | At        | 80459    | 28394 | <b>2.83</b>  |
|       |               |      |                       |        |           | Lp:At     | 3013     | 40155 | 0.08         |
| Lp*Ao | 390800        | 1532 | 0.051                 | 28.51  | < 2.2E-16 | Intercept | 364930   | 19941 | <b>18.30</b> |
|       |               |      |                       |        |           | Lp        | 132440   | 28200 | <b>4.70</b>  |
|       |               |      |                       |        |           | Ao        | 117856   | 28200 | <b>4.18</b>  |
|       |               |      |                       |        |           | Lp:Ao     | 10021    | 39881 | 0.25         |
| Lb*Ap | 383000        | 1532 | 0.088                 | 50.48  | < 2.2E-16 | Intercept | 360626   | 19546 | <b>18.45</b> |
|       |               |      |                       |        |           | Lb        | 226827   | 27643 | <b>8.21</b>  |
|       |               |      |                       |        |           | Ap        | 26486    | 27643 | 0.96         |
|       |               |      |                       |        |           | Lb:Ap     | 21205    | 39093 | 0.54         |
| Lb*At | 381000        | 1532 | 0.098                 | 56.44  | < 2.2E-16 | Intercept | 317699   | 19443 | <b>16.34</b> |
|       |               |      |                       |        |           | Lb        | 267803   | 27497 | <b>9.74</b>  |
|       |               |      |                       |        |           | At        | 112339   | 27497 | <b>4.09</b>  |
|       |               |      |                       |        |           | Lb:At     | -60747   | 38887 | -1.56        |
| Lb*Ao | 378500        | 1532 | 0.110                 | 63.93  | < 2.2E-16 | Intercept | 317344   | 19316 | <b>16.43</b> |
|       |               |      |                       |        |           | Lb        | 227612   | 27317 | <b>8.33</b>  |



|          |        |      |       |       |           |           |         |       |              |
|----------|--------|------|-------|-------|-----------|-----------|---------|-------|--------------|
|          |        |      |       |       |           | Ao        | 113050  | 27317 | <b>4.14</b>  |
|          |        |      |       |       |           | Lb:Ao     | 19634   | 38632 | 0.51         |
| Ap*At    | 398000 | 1532 | 0.016 | 9.19  | 5.0E-06   | Intercept | 404455  | 20308 | <b>19.92</b> |
|          |        |      |       |       |           | Ap        | 94291   | 28720 | <b>3.28</b>  |
|          |        |      |       |       |           | At        | 139167  | 28720 | <b>4.85</b>  |
|          |        |      |       |       |           | Ap:At     | -114403 | 40616 | <b>-2.82</b> |
| Ap*Ao    | 394800 | 1532 | 0.031 | 17.47 | 3.7E-11   | Intercept | 377952  | 20148 | <b>18.76</b> |
|          |        |      |       |       |           | Ap        | 106395  | 28494 | <b>3.73</b>  |
|          |        |      |       |       |           | Ao        | 192173  | 28494 | <b>6.74</b>  |
|          |        |      |       |       |           | Ap:Ao     | -138612 | 40296 | <b>-3.44</b> |
| At*Ao    | 394400 | 1532 | 0.033 | 18.52 | 8.3E-12   | Intercept | 376946  | 20128 | <b>18.73</b> |
|          |        |      |       |       |           | At        | 108409  | 28465 | <b>3.81</b>  |
|          |        |      |       |       |           | Ao        | 149310  | 28465 | <b>5.25</b>  |
|          |        |      |       |       |           | At:Ao     | -52886  | 40256 | -1.31        |
| Lp*Lb*Ap | 368400 | 1528 | 0.157 | 41.70 | < 2.2E-16 | Intercept | 229534  | 26586 | <b>8.63</b>  |
|          |        |      |       |       |           | Lp        | 262183  | 37599 | <b>6.97</b>  |
|          |        |      |       |       |           | Lb        | 390553  | 37599 | <b>10.39</b> |
|          |        |      |       |       |           | Ap        | -6426   | 37599 | -0.17        |
|          |        |      |       |       |           | Lp:Lb     | -327453 | 53173 | <b>-6.16</b> |
|          |        |      |       |       |           | Lp:Ap     | 65825   | 53173 | 1.24         |
|          |        |      |       |       |           | Lb:Ap     | 9041    | 53173 | 0.17         |
|          |        |      |       |       |           | Lp:Lb:Ap  | 24327   | 75197 | 0.32         |
| Lp*Lb*At | 366400 | 1528 | 0.166 | 44.57 | < 2.2E-16 | Intercept | 152962  | 26441 | <b>5.79</b>  |
|          |        |      |       |       |           | Lp        | 329475  | 37393 | <b>8.81</b>  |
|          |        |      |       |       |           | Lb        | 461334  | 37393 | <b>12.34</b> |
|          |        |      |       |       |           | At        | 146719  | 37393 | <b>3.92</b>  |
|          |        |      |       |       |           | Lp:Lb     | -387062 | 52882 | <b>-7.32</b> |
|          |        |      |       |       |           | Lp:At     | -68759  | 52882 | -1.30        |
|          |        |      |       |       |           | Lb:At     | -132519 | 52882 | <b>-2.51</b> |
|          |        |      |       |       |           | Lp:Lb:At  | 143544  | 74786 | 1.92         |
| Lp*Lb*Ao | 364200 | 1528 | 0.176 | 47.78 | < 2.2E-16 | Intercept | 165738  | 26281 | <b>6.31</b>  |
|          |        |      |       |       |           | Lp        | 303211  | 37166 | <b>8.16</b>  |
|          |        |      |       |       |           | Lb        | 398383  | 37166 | <b>10.72</b> |
|          |        |      |       |       |           | Ao        | 121165  | 37166 | <b>3.26</b>  |
|          |        |      |       |       |           | Lp:Lb     | -341541 | 52561 | <b>-6.50</b> |
|          |        |      |       |       |           | Lp:Ao     | -16231  | 52561 | -0.31        |
|          |        |      |       |       |           | Lb:Ao     | -6618   | 52561 | -0.13        |
|          |        |      |       |       |           | Lp:Lb:Ao  | 52503   | 74333 | 0.71         |
| Lp*Ap*At | 392000 | 1528 | 0.045 | 11.35 | 4.3E-14   | Intercept | 356703  | 28289 | <b>12.61</b> |
|          |        |      |       |       |           | Lp        | 95504   | 40006 | <b>2.39</b>  |

|          |        |      |       |       |           |           |         |       |              |
|----------|--------|------|-------|-------|-----------|-----------|---------|-------|--------------|
|          |        |      |       |       |           | Ap        | 53850   | 40006 | 1.35         |
|          |        |      |       |       |           | At        | 136214  | 40006 | <b>3.41</b>  |
|          |        |      |       |       |           | Lp:Ap     | 80882   | 56578 | 1.43         |
|          |        |      |       |       |           | Lp:At     | 5906    | 56578 | 0.10         |
|          |        |      |       |       |           | Ap:At     | -111510 | 56578 | -1.97        |
|          |        |      |       |       |           | Lp:Ap:At  | -5787   | 80013 | -0.07        |
| Lp*Ap*Ao | 387800 | 1528 | 0.065 | 16.37 | < 2.2E-16 | Intercept | 359270  | 27985 | <b>12.84</b> |
|          |        |      |       |       |           | Lp        | 37364   | 39576 | 0.94         |
|          |        |      |       |       |           | Ap        | 11319   | 39576 | 0.29         |
|          |        |      |       |       |           | Ao        | 131080  | 39576 | <b>3.31</b>  |
|          |        |      |       |       |           | Lp:Ap     | 190152  | 55970 | <b>3.40</b>  |
|          |        |      |       |       |           | Lp:Ao     | 122184  | 55970 | <b>2.18</b>  |
|          |        |      |       |       |           | Ap:Ao     | -26449  | 55970 | -0.47        |
|          |        |      |       |       |           | Lp:Ap:Ao  | -224327 | 79153 | <b>-2.83</b> |
| Lp*At*Ao | 388700 | 1528 | 0.061 | 15.28 | < 2.2E-16 | Intercept | 298748  | 28050 | <b>10.65</b> |
|          |        |      |       |       |           | Lp        | 156394  | 39668 | <b>3.94</b>  |
|          |        |      |       |       |           | At        | 132363  | 39668 | <b>3.34</b>  |
|          |        |      |       |       |           | Ao        | 169760  | 39668 | <b>4.28</b>  |
|          |        |      |       |       |           | Lp:At     | -47908  | 56099 | -0.85        |
|          |        |      |       |       |           | Lp:Ao     | -40900  | 56099 | -0.73        |
|          |        |      |       |       |           | At:Ao     | -103807 | 56099 | -1.85        |
|          |        |      |       |       |           | Lp:At:Ao  | 101842  | 79336 | 1.28         |
| Lb*Ap*At | 379800 | 1528 | 0.103 | 26.30 | < 2.2E-16 | Intercept | 266007  | 27410 | <b>9.71</b>  |
|          |        |      |       |       |           | Lb        | 276897  | 38764 | <b>7.14</b>  |
|          |        |      |       |       |           | Ap        | 103385  | 38764 | <b>2.67</b>  |
|          |        |      |       |       |           | At        | 189238  | 38764 | <b>4.88</b>  |
|          |        |      |       |       |           | Lb:Ap     | -18188  | 54821 | -0.33        |
|          |        |      |       |       |           | Lb:At     | -100140 | 54821 | -1.83        |
|          |        |      |       |       |           | Ap:At     | -153796 | 54821 | <b>-2.81</b> |
|          |        |      |       |       |           | Lb:Ap:At  | 78786   | 77529 | 1.02         |
| Lb*Ap*Ao | 376700 | 1528 | 0.118 | 30.42 | < 2.2E-16 | Intercept | 255278  | 27183 | <b>9.39</b>  |
|          |        |      |       |       |           | Lb        | 245348  | 38442 | <b>6.38</b>  |
|          |        |      |       |       |           | Ap        | 124131  | 38442 | <b>3.23</b>  |
|          |        |      |       |       |           | Ao        | 210694  | 38442 | <b>5.48</b>  |
|          |        |      |       |       |           | Lb:Ap     | -35471  | 54366 | -0.65        |
|          |        |      |       |       |           | Lb:Ao     | -37042  | 54366 | -0.68        |
|          |        |      |       |       |           | Ap:Ao     | -195289 | 54366 | <b>-3.59</b> |
|          |        |      |       |       |           | Lb:Ap:Ao  | 113352  | 76884 | 1.47         |
| Lb*At*Ao | 376000 | 1528 | 0.121 | 31.27 | < 2.2E-16 | Intercept | 234829  | 27136 | <b>8.65</b>  |
|          |        |      |       |       |           | Lb        | 284233  | 38376 | <b>7.41</b>  |

|             |        |      |       |       |           |             |         |        |              |
|-------------|--------|------|-------|-------|-----------|-------------|---------|--------|--------------|
|             |        |      |       |       |           | At          | 165030  | 38376  | <b>4.30</b>  |
|             |        |      |       |       |           | Ao          | 165740  | 38376  | <b>4.32</b>  |
|             |        |      |       |       |           | Lb:At       | -113242 | 54272  | <b>-2.09</b> |
|             |        |      |       |       |           | Lb:Ao       | -32861  | 54272  | -0.61        |
|             |        |      |       |       |           | At:Ao       | -105381 | 54272  | -1.94        |
|             |        |      |       |       |           | Lb:At:Ao    | 104989  | 76753  | 1.37         |
| Ap*At*Ao    | 391700 | 1528 | 0.047 | 11.72 | 1.4E-14   | Intercept   | 280970  | 28266  | <b>9.94</b>  |
|             |        |      |       |       |           | Ap          | 191952  | 39974  | <b>4.80</b>  |
|             |        |      |       |       |           | At          | 193965  | 39974  | <b>4.85</b>  |
|             |        |      |       |       |           | Ao          | 246970  | 39974  | <b>6.18</b>  |
|             |        |      |       |       |           | Ap:At       | -171113 | 56532  | <b>-3.03</b> |
|             |        |      |       |       |           | Ap:Ao       | -195322 | 56532  | <b>-3.46</b> |
|             |        |      |       |       |           | At:Ao       | -109596 | 56532  | -1.94        |
|             |        |      |       |       |           | Ap:At:Ao    | 113418  | 79948  | 1.42         |
| Lp*Lb*Ap*At | 364400 | 1520 | 0.175 | 22.66 | < 2.2E-16 | Intercept   | 139633  | 37192  | <b>3.75</b>  |
|             |        |      |       |       |           | Lp          | 252747  | 52597  | <b>4.81</b>  |
|             |        |      |       |       |           | Lb          | 434140  | 52597  | <b>8.25</b>  |
|             |        |      |       |       |           | Ap          | 26656   | 52597  | 0.51         |
|             |        |      |       |       |           | At          | 179801  | 52597  | <b>3.42</b>  |
|             |        |      |       |       |           | Lp:Lb       | -314486 | 74384  | <b>-4.23</b> |
|             |        |      |       |       |           | Lp:Ap       | 153457  | 74384  | <b>2.06</b>  |
|             |        |      |       |       |           | Lb:Ap       | 54387   | 74384  | 0.73         |
|             |        |      |       |       |           | Lp:At       | 18873   | 74384  | 0.25         |
|             |        |      |       |       |           | Lb:At       | -87173  | 74384  | -1.17        |
|             |        |      |       |       |           | Ap:At       | -66164  | 74384  | -0.89        |
|             |        |      |       |       |           | Lp:Lb:Ap    | -145151 | 105195 | -1.38        |
|             |        |      |       |       |           | Lp:Lb:At    | -25934  | 105195 | -0.25        |
|             |        |      |       |       |           | Lp:Ap:At    | -175265 | 105195 | -1.67        |
|             |        |      |       |       |           | Lb:Ap:At    | -90692  | 105195 | -0.86        |
|             |        |      |       |       |           | Lp:Lb:Ap:At | 338956  | 148768 | <b>2.28</b>  |
| Lp*Lb*Ap*Ao | 361000 | 1520 | 0.190 | 25.03 | < 2.2E-16 | Intercept   | 153266  | 36842  | <b>4.16</b>  |
|             |        |      |       |       |           | Lp          | 204026  | 52102  | <b>3.92</b>  |
|             |        |      |       |       |           | Lb          | 412009  | 52102  | <b>7.91</b>  |
|             |        |      |       |       |           | Ap          | 24946   | 52102  | 0.48         |
|             |        |      |       |       |           | Ao          | 152536  | 52102  | <b>2.93</b>  |
|             |        |      |       |       |           | Lp:Lb       | -333323 | 73683  | <b>-4.52</b> |
|             |        |      |       |       |           | Lp:Ap       | 198370  | 73683  | <b>2.69</b>  |
|             |        |      |       |       |           | Lb:Ap       | -27253  | 73683  | -0.37        |
|             |        |      |       |       |           | Lp:Ao       | 116315  | 73683  | 1.58         |
|             |        |      |       |       |           | Lb:Ao       | -42912  | 73683  | -0.58        |

|             |        |      |       |       |           |             |         |        |              |
|-------------|--------|------|-------|-------|-----------|-------------|---------|--------|--------------|
|             |        |      |       |       |           | Ap:Ao       | -62743  | 73683  | -0.85        |
|             |        |      |       |       |           | Lp:Lb:Ap    | -16436  | 104204 | -0.16        |
|             |        |      |       |       |           | Lp:Lb:Ao    | 11739   | 104204 | 0.11         |
|             |        |      |       |       |           | Lp:Ap:Ao    | -265091 | 104204 | <b>-2.54</b> |
|             |        |      |       |       |           | Lb:Ap:Ao    | 72589   | 104204 | 0.70         |
|             |        |      |       |       |           | Lp:Lb:Ap:Ao | 81528   | 147366 | 0.55         |
| Lp*Lb*At*Ao | 361300 | 1520 | 0.189 | 24.83 | < 2.2E-16 | Intercept   | 48220   | 36871  | 1.31         |
|             |        |      |       |       |           | Lp          | 373218  | 52144  | <b>7.16</b>  |
|             |        |      |       |       |           | Lb          | 501057  | 52144  | <b>9.61</b>  |
|             |        |      |       |       |           | At          | 235038  | 52144  | <b>4.51</b>  |
|             |        |      |       |       |           | Ao          | 209483  | 52144  | <b>4.02</b>  |
|             |        |      |       |       |           | Lp:Lb       | -433648 | 73742  | <b>-5.88</b> |
|             |        |      |       |       |           | Lp:At       | -140015 | 73742  | -1.90        |
|             |        |      |       |       |           | Lb:At       | -205349 | 73742  | <b>-2.79</b> |
|             |        |      |       |       |           | Lp:Ao       | -87487  | 73742  | -1.19        |
|             |        |      |       |       |           | Lb:Ao       | -79448  | 73742  | -1.08        |
|             |        |      |       |       |           | At:Ao       | -176637 | 73742  | <b>-2.40</b> |
|             |        |      |       |       |           | Lp:Lb:At    | 184214  | 104287 | 1.77         |
|             |        |      |       |       |           | Lp:Lb:Ao    | 93174   | 104287 | 0.89         |
|             |        |      |       |       |           | Lp:At:Ao    | 142512  | 104287 | 1.37         |
|             |        |      |       |       |           | Lb:At:Ao    | 145660  | 104287 | 1.40         |
|             |        |      |       |       |           | Lp:Lb:At:Ao | -81341  | 147485 | -0.55        |
| Lp*Ap*At*Ao | 384600 | 1520 | 0.081 | 9.99  | < 2.2E-16 | Intercept   | 237856  | 39252  | <b>6.06</b>  |
|             |        |      |       |       |           | Lp          | 86227   | 55511  | 1.55         |
|             |        |      |       |       |           | Ap          | 121784  | 55511  | <b>2.19</b>  |
|             |        |      |       |       |           | At          | 242828  | 55511  | <b>4.37</b>  |
|             |        |      |       |       |           | Ao          | 237694  | 55511  | <b>4.28</b>  |
|             |        |      |       |       |           | Lp:Ap       | 140334  | 78505  | 1.79         |
|             |        |      |       |       |           | Lp:At       | -97726  | 78505  | -1.25        |
|             |        |      |       |       |           | Ap:At       | -220930 | 78505  | <b>-2.81</b> |
|             |        |      |       |       |           | Lp:Ao       | 18552   | 78505  | 0.24         |
|             |        |      |       |       |           | Ap:Ao       | -135869 | 78505  | -1.73        |
|             |        |      |       |       |           | At:Ao       | -213228 | 78505  | <b>-2.72</b> |
|             |        |      |       |       |           | Lp:Ap:At    | 99635   | 111022 | 0.90         |
|             |        |      |       |       |           | Lp:Ap:Ao    | -118905 | 111022 | -1.07        |
|             |        |      |       |       |           | Lp:At:Ao    | 207264  | 111022 | 1.87         |
|             |        |      |       |       |           | Ap:At:Ao    | 218840  | 111022 | <b>1.97</b>  |
|             |        |      |       |       |           | Lp:Ap:At:Ao | -210844 | 157009 | -1.34        |
| Lb*Ap*At*Ao | 373100 | 1520 | 0.135 | 16.96 | < 2.2E-16 | Intercept   | 116623  | 38078  | <b>3.06</b>  |
|             |        |      |       |       |           | Lb          | 328694  | 53851  | <b>6.10</b>  |

|                |        |      |       |       |           |             |          |         |              |
|----------------|--------|------|-------|-------|-----------|-------------|----------|---------|--------------|
|                |        |      |       |       |           | Ap          | 236413   | 53851   | <b>4.39</b>  |
|                |        |      |       |       |           | At          | 277312   | 53851   | <b>5.15</b>  |
|                |        |      |       |       |           | Ao          | 298768   | 53851   | <b>5.55</b>  |
|                |        |      |       |       |           | Lb:Ap       | -88922   | 76156   | -1.17        |
|                |        |      |       |       |           | Lb:At       | -166693  | 76156   | <b>-2.19</b> |
|                |        |      |       |       |           | Ap:At       | -224564  | 76156   | <b>-2.95</b> |
|                |        |      |       |       |           | Lb:Ao       | -103595  | 76156   | -1.36        |
|                |        |      |       |       |           | Ap:Ao       | -266056  | 76156   | <b>-3.49</b> |
|                |        |      |       |       |           | At:Ao       | -176148  | 76156   | <b>-2.31</b> |
|                |        |      |       |       |           | Lb:Ap:At    | 106902   | 107701  | 0.99         |
|                |        |      |       |       |           | Lb:Ap:Ao    | 141468   | 107701  | 1.31         |
|                |        |      |       |       |           | Lb:At:Ao    | 133105   | 107701  | 1.24         |
|                |        |      |       |       |           | Ap:At:Ao    | 141535   | 107701  | 1.31         |
|                |        |      |       |       |           | Lb:Ap:At:Ao | -56232   | 152313  | -0.37        |
| Lp*Lb*Ap*At*Ao | 356300 | 1504 | 0.211 | 14.25 | < 2.2E-16 | Intercept   | -1.0E-09 | 5.1E+04 | 0.00         |
|                |        |      |       |       |           | Lp          | 2.3E+05  | 7.3E+04 | <b>3.21</b>  |
|                |        |      |       |       |           | Lb          | 4.8E+05  | 7.3E+04 | <b>6.54</b>  |
|                |        |      |       |       |           | Ap          | 9.6E+04  | 7.3E+04 | 1.33         |
|                |        |      |       |       |           | At          | 3.1E+05  | 7.3E+04 | <b>4.22</b>  |
|                |        |      |       |       |           | Ao          | 2.8E+05  | 7.3E+04 | <b>3.84</b>  |
|                |        |      |       |       |           | Lp:Lb       | -2.9E+05 | 1.0E+05 | <b>-2.86</b> |
|                |        |      |       |       |           | Lp:Ap       | 2.8E+05  | 1.0E+05 | <b>2.72</b>  |
|                |        |      |       |       |           | Lb:Ap       | 5.1E+04  | 1.0E+05 | 0.49         |
|                |        |      |       |       |           | Lp:At       | -5.8E+04 | 1.0E+05 | -0.57        |
|                |        |      |       |       |           | Lb:At       | -1.3E+05 | 1.0E+05 | -1.24        |
|                |        |      |       |       |           | Ap:At       | -1.4E+05 | 1.0E+05 | -1.39        |
|                |        |      |       |       |           | Lp:Ao       | 3.9E+04  | 1.0E+05 | 0.38         |
|                |        |      |       |       |           | Lb:Ao       | -8.3E+04 | 1.0E+05 | -0.81        |
|                |        |      |       |       |           | Ap:Ao       | -1.4E+05 | 1.0E+05 | -1.36        |
|                |        |      |       |       |           | At:Ao       | -2.5E+05 | 1.0E+05 | <b>-2.46</b> |
|                |        |      |       |       |           | Lp:Lb:Ap    | -2.8E+05 | 1.5E+05 | -1.92        |
|                |        |      |       |       |           | Lp:Lb:At    | -7.9E+04 | 1.5E+05 | -0.54        |
|                |        |      |       |       |           | Lp:Ap:At    | -1.6E+05 | 1.5E+05 | -1.12        |
|                |        |      |       |       |           | Lb:Ap:At    | -1.6E+05 | 1.5E+05 | -1.07        |
|                |        |      |       |       |           | Lp:Lb:Ao    | -4.1E+04 | 1.5E+05 | -0.28        |
|                |        |      |       |       |           | Lp:Ap:Ao    | -2.5E+05 | 1.5E+05 | -1.74        |
|                |        |      |       |       |           | Lb:Ap:Ao    | 7.4E+03  | 1.5E+05 | 0.05         |
|                |        |      |       |       |           | Lp:At:Ao    | 1.5E+05  | 1.5E+05 | 1.06         |
|                |        |      |       |       |           | Lb:At:Ao    | 8.0E+04  | 1.5E+05 | 0.55         |
|                |        |      |       |       |           | Ap:At:Ao    | 1.5E+05  | 1.5E+05 | 1.06         |

|                |          |         |             |
|----------------|----------|---------|-------------|
| Lp:Lb:Ap:At    | 5.3E+05  | 2.1E+05 | <b>2.56</b> |
| Lp:Lb:Ap:Ao    | 2.7E+05  | 2.1E+05 | 1.30        |
| Lp:Lb:At:Ao    | 1.1E+05  | 2.1E+05 | 0.51        |
| Lp:Ap:At:Ao    | -2.4E+04 | 2.1E+05 | -0.12       |
| Lb:Ap:At:Ao    | 1.3E+05  | 2.1E+05 | 0.63        |
| Lp:Lb:Ap:At:Ao | -3.7E+05 | 2.9E+05 | -1.28       |

Math Supplement:  
 Mathematical Framework for Detecting  
 Microbiome Interactions in the Host

November 14, 2018

**Contents**

|    |                                                                                                    |           |
|----|----------------------------------------------------------------------------------------------------|-----------|
| 1  |                                                                                                    |           |
| 2  |                                                                                                    |           |
| 3  |                                                                                                    |           |
| 4  |                                                                                                    |           |
| 5  |                                                                                                    |           |
| 6  |                                                                                                    |           |
| 7  | <b>1 Availability of code</b>                                                                      | <b>2</b>  |
| 8  | <b>2 Introduction to Geometric Interactions (Figure 4)</b>                                         | <b>2</b>  |
| 9  | <b>3 Glossary for interactions - Mathematical Terminology</b>                                      | <b>3</b>  |
| 10 | <b>4 Multivariate linear model to detect interactions between bacteria</b>                         | <b>4</b>  |
| 11 | <b>5 Two disjoint families of interactions: standard and contextual tests</b>                      | <b>4</b>  |
| 12 | 5.1 Standard tests . . . . .                                                                       | 4         |
| 13 | 5.2 Contextual tests . . . . .                                                                     | 8         |
| 14 | 5.3 Interaction coordinates . . . . .                                                              | 8         |
| 15 | 5.4 Circuits . . . . .                                                                             | 8         |
| 16 | 5.5 Recursively constructing higher order interactions from lower order interactions . . . . .     | 9         |
| 17 | <b>6 Significance testing of interactions</b>                                                      | <b>11</b> |
| 18 | <b>7 Supplemental Results of Interaction Testing</b>                                               | <b>12</b> |
| 19 | 7.1 Computed standard tests . . . . .                                                              | 12        |
| 20 | 7.2 Comparing the relative importance of individual bacterial species versus their interactions in |           |
| 21 | determining physiological traits . . . . .                                                         | 14        |
| 22 | 7.3 Results for all computed interactions from Figs. 4, 5, and S12 . . . . .                       | 14        |
| 23 | <b>8 Discussion of Interaction Tests</b>                                                           | <b>16</b> |
| 24 | <b>9 Averaging model for prediction of high-diversity traits with low-diversity measurements</b>   |           |
| 25 | <b>(Figure 2)</b>                                                                                  | <b>16</b> |
| 26 | 9.1 Single-species mixing model . . . . .                                                          | 16        |
| 27 | 9.2 Pairwise species mixing model . . . . .                                                        | 17        |
| 28 | 9.3 Comparison of single-species and pairwise mixing model predictions . . . . .                   | 17        |
| 29 | 9.4 Comparison of single-species and pairwise mixing model errors . . . . .                        | 17        |
| 30 | 9.5 Coefficient of variation of traits at increasing diversity . . . . .                           | 18        |
| 31 | <b>10 Pairwise species interactions (Figure 6)</b>                                                 | <b>18</b> |
| 32 | 10.1 Bacterial interactions determined by Paine’s method (Figure 6B,C, S15A,B) . . . . .           | 18        |
| 33 | 10.2 Bacterial interactions fit by a generalized Lotka-Volterra model (Figure S15D,E) . . . . .    | 19        |
| 34 | 10.3 Prediction of high-diversity bacterial abundances from low-diversity data . . . . .           | 20        |
| 35 | 10.4 Pairwise correlations (Figure 6A) . . . . .                                                   | 21        |
| 36 | 10.5 Determining statistical trends . . . . .                                                      | 21        |

|    |                                                     |           |
|----|-----------------------------------------------------|-----------|
| 37 | <b>11 Supplements</b>                               | <b>21</b> |
| 38 | 11.1 Data transformation . . . . .                  | 21        |
| 39 | 11.2 Spurious epistasis in the microbiome . . . . . | 23        |
| 40 | 11.3 Simulated data . . . . .                       | 23        |

## 41 1 Availability of code

42 The Python code for computing interactions coordinates and circuits in a system of  $n$ -bacterial species is  
 43 available on Github at <https://github.com/cbg-ethz/epistasis-formulas>, see [8]. The code can also be  
 44 used to compute the magnitude of an interaction as well as the interval in which an interaction is contained  
 45 if the starting measurements are given as intervals.

## 46 2 Introduction to Geometric Interactions (Figure 4)

47 It is in open question in the microbiome field of how to quantify the many possible interactions between  
 48 different bacterial species within a microbial community and to measure how these interactions impact host  
 49 physiology traits. Here, we apply the mathematics of genetic epistasis to the microbiome. We explicitly make  
 50 an analogy between genetic loci in a genome and bacterial species in a microbiome in order to calculate the  
 51 interactions between species in a microbiome and their effects on host physiology. The basic assumption is  
 52 that if two bacterial species have independent effects on the host, their phenotypes will be additive. The  
 53 interaction is the degree to which this assumption is incorrect.

54 For an  $n$ -genotype system, genetic interactions, *i.e.* epistasis, are commonly described in terms of ‘interac-  
 55 tion coordinates’ and ‘circuits’ (see work of Beerenwinkel, Pachter, and Sturmfels[2]). Interaction coordinates  
 56 are equations that calculate the effect of interactions between genetic loci on organismal traits. ‘Circuits’ use  
 57 the interaction coordinates as basis vectors and can give a richer description of the complete interaction space  
 58 (see [2] for details). Circuits can, for instance, ask how much of a three-way interaction can be explained  
 59 by a two-way interaction between individual species. Beerenwinkel, Pachter, and Sturmfels (BPS) described  
 60 a formal mathematical framework to quantify interactions between genetic loci in an  $n$ -locus system [2].  
 61 The combinatorial nature and flexibility of the approach make the BPS framework generalizable to different  
 62 types of high dimensional interacting systems beyond gene networks. Here we apply the formal framework  
 63 with its interaction coordinates and circuits to the microbiome.

64 Besides a graspable biological interpretation, interaction coordinates and circuits also have a geometric  
 65 interpretation, as these are formulas whose terms can be parametrized by certain sets of vertices on an  
 66  $n$ -cube and where  $n$  is the number of loci considered. These higher order interactions generalize several  
 67 well-known and widely used notions of gene interaction, including Fourier-Walsh coefficients (see Box 1 in  
 68 Weinreich, Lan, et al. 2013 [12]). This geometric interpretation is particularly useful, as it facilitates the  
 69 parametrization of these types of formulas. Different sets of vertices in an  $n$ -cube then yield different circuits.

Here, we study interactions of up to five bacterial species, which we have found to be the minimal set of  
 consistently occurring, stably associated species in wild and laboratory *Drosophila melanogaster* fruit flies.  
 In this work, we exploit the combinatorial geometry of the 5-cube. We examine lower dimensional cubes and  
 lift well known lower rank interactions to the higher dimensional space. For instance, we test whether the  
 positive interaction between Ap and Lp stays positive when At is introduced. By this we mean, we compare  
 the formulas of the following type:

$$\begin{aligned}
 u_{10100} &= w_{00000} + w_{10100} - w_{10000} - w_{00100} \\
 u_{10110} &= w_{00010} + w_{10110} - w_{10010} - w_{00110},
 \end{aligned}$$

70 where  $u_{10100}$  specifies an interaction between the species indicated in binary notation (10100 indicates the  
 71 first and third species are present; see Fig. 1A and Box 1), and  $w_{10100}$  indicates the physiology trait score  
 72 with the species indicated in binary. Generalizing, we extend the two-way interaction case up to the complete  
 73 5-way interactions along with combinatorial associations at intermediate diversity.

74 Clearly, extracting relevant and biologically meaningful interactions from among the many possible inter-  
 75 action coordinates and circuits must avoid redundant analyses. Therefore, in this paper we focus on the



76 interactions we find biologically interpretable and comparable with other studies (e.g. Newell and Douglas  
77 2014 [9]).

78 In this Supplement, we give examples of how the mathematical approach applies to other biological  
79 systems specifically to bacterial interactions in the gut microbiome and explain how this approach generalizes  
80 to  $n$ -dimensional systems and to all lower rank interactions inside this system.

### 81 3 Glossary for interactions - Mathematical Terminology

82 The terminology we use is an adaptation of genetic epistasis to the study of interactions among bacterial  
83 species in fruit flies. For convenience we include the following intuitive definitions of terms we will repeatedly  
84 use later on:

- 85 •  **$n$ -species system**: a system of  $n$  types of bacterial species in the microbiome (present or absent). We  
86 refer to a bacterial combination within the  $n$ -species system using binary code. For instance, 00000  
87 indicates no species present in a 5-species system, 111 indicates all species present in a 3-species system,  
88 and 1010 indicates the first and third species present in a 4-species system. Thus, each unique species  
89 is assigned an index with the binary string.
- 90 •  **$n$ -cube ( $n$  dimensional unit hypercube)**: is an  $n$ -dimensional generalization of a square (2-cube)  
91 or cube (3-cube) whose sides have unit lengths. When  $n=5$ , the 5-cube has 32 vertices, 80 edges, 80  
92 square faces, 40 3-cubes and 10 4-cubes, see [4].
- 93 • **phenotype**: is a measured, quantitative trait that is associated with a particular bacterial combination.  
94 In this work, we consider the number of bacterial CFUs, the development time of a fly from embryo to  
95 adult, the fecundity of a female fly, and the lifespan of a fly. We consider each phenotype separately,  
96 and we use  $w$  to refer generally to any phenotype. The phenotype associated with a specific bacterial  
97 combination is given by  $w_{XXX}$  where  $XXX$  is a binary string of length  $n$  referring to a bacterial  
98 combination.
- 99 • **Interaction coordinates**: are equations that describe the non-additivity of phenotypes associated  
100 with sets of species. For instance, if we consider two species, the interaction coordinate is just the degree  
101 to which  $w_{11}$  cannot be determined from knowing  $w_{00}$ ,  $w_{01}$ , and  $w_{10}$ . We use  $u$  to refer generally to  
102 an interaction coordinate and we associate a specific interaction coordinate with its binary string. For  
103 instance,  $u_{11}$  indicates the interaction we are considering dependent upon  $w_{00}$ ,  $w_{01}$ ,  $w_{10}$ , and  $w_{11}$ . If  
104  $u_{11} = 0$ , the phenotypes are completely additive, and we say there is no interaction. More generally, in  
105 the  $n$ -species system, interaction coordinates are given by linear combinations of the measured traits  
106 associated with each bacterial combination.
- 107 • **Circuits**: are certain linear combinations of interaction coordinates. In this sense, interaction coordi-  
108 nates form the basis elements for the interaction space, which can be more completely explored using  
109 circuits. Many different types of circuits exist, which we classify based on their symmetry groups.  
110 We assign a letter to each of these symmetry groups. For instance, the circuit  $b$  (described in a later  
111 section), is defined as the difference between  $u_{110}$  and  $u_{111}$  and it asks if the interaction between the  
112 first two species changes when the third species is added.
- 113 • **Triangulation**: is the local shape of the phenotypic landscape imposed by the interactions between  
114 bacterial species (see Box 1 for an example).
- 115 • **Standard interactions (or standard tests)**: are 2, 3, 4 and 5-way interactions on all pairs, triples,  
116 quadruples and five tuples of species leaving the remaining species absent. An example is  $u_{11}$ , described  
117 in the definition for 'interaction coordinates'.
- 118 • **Contextual interactions (or contextual tests)**: are higher-order interactions (higher order here  
119 means interactions with more than 4 summands) arising as a generalization of the standard test. For  
120 instance, interaction coordinates for the 2, 3 and 4 and 5 species systems can be generalized by allowing  
121 the species not present to be occupied by bystanders, whose presence/absence is constant across the  
122 species considered in the standard test. Circuit  $b$  is an example of a contextual interaction of order  
123 three.

124 **Summary of glossary section** In this work, we focus on a 5 species system consisting of 32 bacterial  
 125 combinations. We encode the different bacterial combinations by a fixed binary string  $S$  of lengths 5. Each  
 126 entry of such a string  $S$  represents a bacterial species isolated inside a number of flies guts. For instance,  
 127  $S=00000$  describes the germ-free fly,  $S=11111$  describes the fly colonized with all 5 species of bacteria. With  
 128 this binary notion, each bacterial combination defines a unique vertex of the 5-dimensional cube  $G$ . Together  
 129 with the 5-cube  $G$ , we also consider the following four phenotypes associated with the bacterial combinations:  
 130 bacterial load (CFUs), development rate, fecundity, and time to death. The phenotypes associated with each  
 131 bacterial combination in binary notation are denoted simply by  $w_S$ . The order of the bacterial species are  
 132 fixed and as described in the main text.

## 133 4 Multivariate linear model to detect interactions between bacte- 134 ria

135 We use standard methods in R to calculate interactions (see Text for references). The mathematical formulas  
 136 are provided here for completeness. Consider the Taylor expansion of the fitness landscape

$$f(x_1, \dots, x_5) = \beta_0 + \sum_i \beta_i x_i + \sum_{i < j} \beta_{i,j} x_i x_j + \sum_{i < j < k} \beta_{i,j,k} x_i x_j x_k + \dots$$

137 Here,  $x_i$  is the binary variable corresponding to the presence (1) or absence (0) of species  $i$ , for  $i$  from 1 to 5.  
 138 The coefficients  $\beta$ 's are hence the contributions of the corresponding interactions between species to the total  
 139 fitness of the population. For example,  $f(1, 1, 1, 0, 0)$  is the fitness of the population when only the first three  
 140 species are present. This fitness is then decomposed into the sum of the contributions of the three species  
 141 alone:  $\beta_1 + \beta_2 + \beta_3$ , plus the contribution of all pairwise interactions:  $\beta_{1,2} + \beta_{1,3} + \beta_{2,3}$ , plus the contribution  
 142 of the three-way interaction:  $\beta_{1,2,3}$ . The rest of summands in the Taylor expansion of  $f(1, 1, 1, 0, 0)$  are 0.

143 Given a set of estimates of the values of  $f$  by the data, we can fit the multiple linear regression model  
 144 to estimate the coefficients  $\beta$ . This allows us to disentangle the contributions of the species and those of the  
 145 interactions between the species.

146 We have implemented this method at [https://github.com/gavruskin/microinteractions/blob/master/  
 147 taylor\\_lin\\_fit.ipynb](https://github.com/gavruskin/microinteractions/blob/master/taylor_lin_fit.ipynb), where all necessary python code to reproduce the analysis can be found.

148 Note that in the code we denote the parameters by  $a, b, c, d, \dots$  instead of  $\beta$ 's.

## 149 5 Two disjoint families of interactions: standard and contextual 150 tests

151 In the following, we formally define two disjoint families of interaction formulas (tests) in the five bacterial  
 152 species setting. The first family, standard tests, is smaller in size than the second, contextual tests. Standard  
 153 tests allow us to determine whether the phenotype of a group of bacterial species can be computed from  
 154 the sum of its parts. These tests can be linked the coefficients of the multivariate linear regression method  
 155 presented in Section 4 (main text Figure S10).

156 The family of contextual tests describe how standard test change according to the presence of additional  
 157 bacterial species and includes circuits [2]. These two families of test we define in this work are new and  
 158 inspired by [1] and [6] (the second reference for standard tests).

### 159 5.1 Standard tests

Consider the two species formula, given by:

$$u_{11} = w_{00} + w_{11} - w_{01} - w_{10}$$

160 where  $w_{00}$  indicates a phenotype, such as daily fecundity, time to death, CFU or development rate, associated  
 161 to the bacterial combination 00, which is germ-free. Similarly,  $w_{11}$  (both species),  $w_{01}$  (one species) and  
 162  $w_{10}$  (the other species). Biologically, the meaning of this formula is well understood: it compares the

163 phenotype contributions of the two-species association with the single species associations. Geometrically,  
 164 the summands of  $u_{11}$ , which are  $w_{00}, w_{11}, w_{01}$  and  $w_{10}$ , can be indexed by the four vertices of a unit square.

We then consider the following generalizations of  $u_{11}$  for the 3-, 4- and 5-species system:

$$u_{111} = w_{000} + w_{011} + w_{101} + w_{110} - w_{100} - w_{010} - w_{001} - w_{111}$$

$$u_{1111} = w_{0000} + w_{1100} + w_{0110} + w_{0011} + w_{1010} + w_{0101} + w_{1001} + w_{1111} \\ - w_{1000} - w_{0100} - w_{0010} - w_{0001} - w_{1011} - w_{1101} - w_{0111} - w_{1110}$$

$$u_{11111} = w_{00000} - w_{00001} - w_{00010} - w_{00100} - w_{01000} - w_{10000} + w_{11000} \\ + w_{10100} + w_{10010} + w_{10001} + w_{01100} + w_{01010} + w_{01001} + w_{00110} \\ + w_{00101} + w_{00011} - w_{11100} - w_{11010} - w_{11001} - w_{10110} - w_{10101} \\ - w_{10011} - w_{01110} - w_{01101} - w_{01011} - w_{00111} + w_{11110} + w_{11101} \\ + w_{11011} + w_{10111} + w_{01111} - w_{11111}.$$

165 In this work, we simply call  $u_{11}$  the 2-way interaction,  $u_{111}$  the 3-way interaction,  $u_{1111}$  the 4-way interaction,  
 166 and  $u_{11111}$  the 5-way interaction. From the given formulas it is clear that these interactions are defined by  
 167 4, 8, 16, and 32 terms, respectively. The signs of the terms change according to equation (4). As previous  
 168 authors have described, this sign change results from a Fourier transform, see [2]. Biologically, one can say  
 169 that these tests compare the phenotypes of bacterial combinations when an even number of bacterial species  
 170 are present versus when an odd number of bacterial species are present (e.g.  $w_{00}$  and  $w_{11}$  vs  $w_{01}$  and  $w_{10}$ ).

**Quantifying the number of tests within symmetry groups of the 5-cube.** Examining the symmetries of the 5-cube, we can see that there are 10 possible 2-way interactions,  $u_{11}$ . Similarly there are 10 different 3-way interactions and five 4-way interactions. Together, this approach gives the

$$\binom{5}{2} + \binom{5}{3} + \binom{5}{4} + \binom{5}{5} = 26 \quad (1)$$

171 different standard tests in a five bacterial species system. The number of standard tests we find in Equation  
 172 (1) matches the results of [6].

To be explicit, the standard tests involving two species of bacteria out of five are:

$$u_{00**0} = w_{00000} + w_{00110} - w_{00010} - w_{00100} \\ u_{**000} = w_{00000} + w_{11000} - w_{01000} - w_{10000} \\ u_{*0*00} = w_{00000} + w_{10100} - w_{00100} - w_{10000} \\ u_{0**00} = w_{00000} + w_{01100} - w_{00100} - w_{01000} \\ u_{*00*0} = w_{00000} + w_{10010} - w_{00010} - w_{10000} \\ u_{0*0*0} = w_{00000} + w_{01010} - w_{00010} - w_{01000} \\ u_{00*0*} = w_{00000} + w_{00101} - w_{00001} - w_{00100} \\ u_{*000*} = w_{00000} + w_{10001} - w_{00001} - w_{10000} \\ u_{0*00*} = w_{00000} + w_{01001} - w_{00001} - w_{01000} \\ u_{000**} = w_{00000} + w_{00011} - w_{00001} - w_{00010}$$

173 These tests arise from the 2-way interaction and always involve two bacterial species (indicated with \*)  
 174 out of five leaving the other three species absent. Geometrically, these  $u$ -interactions involve the four vertices  
 175 of certain square faces inside a 5-dimensional cube  $G$ .

The standard test involving three species out of the five are:

$$\begin{aligned}
u_{00***} &= w_{00000} + w_{00011} + w_{00101} + w_{00110} - w_{00100} - w_{00010} - w_{00001} - w_{00111} \\
u_{***00} &= w_{00000} + w_{01100} + w_{10100} + w_{11000} - w_{10000} - w_{01000} - w_{00100} - w_{11100} \\
u_{**0*0} &= w_{00000} + w_{01010} + w_{10010} + w_{11000} - w_{10000} - w_{01000} - w_{00010} - w_{11010} \\
u_{*0**0} &= w_{00000} + w_{00110} + w_{10010} + w_{10100} - w_{10000} - w_{00100} - w_{00010} - w_{10110} \\
u_{0****} &= w_{00000} + w_{00110} + w_{01010} + w_{01100} - w_{01000} - w_{00100} - w_{00010} - w_{01110} \\
u_{**00*} &= w_{00000} + w_{01001} + w_{10001} + w_{11000} - w_{10000} - w_{01000} - w_{00001} - w_{11001} \\
u_{*00**} &= w_{00000} + w_{00011} + w_{10001} + w_{10010} - w_{10000} - w_{00010} - w_{00001} - w_{10011} \\
u_{*0*0*} &= w_{00000} + w_{00101} + w_{10001} + w_{10100} - w_{10000} - w_{00100} - w_{00001} - w_{10101} \\
u_{0***0} &= w_{00000} + w_{00101} + w_{01001} + w_{01100} - w_{01000} - w_{00100} - w_{00001} - w_{01101} \\
u_{0*0**} &= w_{00000} + w_{00011} + w_{01001} + w_{01010} - w_{01000} - w_{00010} - w_{00001} - w_{01011}
\end{aligned}$$

These tests involve different combinations of vertices of  $G$  and define three dimensional cubes. The following five standard tests arise from the 4-way interaction described by  $u_{1111}$  above and involve four species out of the five, leaving out the remaining bacterial species:

$$\begin{aligned}
u_{*****} &= w_{00000} + w_{11000} + w_{01100} + w_{00110} + w_{10100} + w_{01010} + w_{10010} + w_{11110} \\
&\quad - w_{10000} - w_{01000} - w_{00100} - w_{00010} - w_{10110} - w_{11010} - w_{01110} - w_{11100} \\
u_{***0*} &= w_{00000} + w_{11000} + w_{01100} + w_{00101} + w_{10100} + w_{01001} + w_{10001} + w_{11101} \\
&\quad - w_{10000} - w_{01000} - w_{00100} - w_{00001} - w_{10101} - w_{11001} - w_{01101} - w_{11100} \\
u_{**0**} &= w_{00000} + w_{11000} + w_{01010} + w_{00011} + w_{10010} + w_{01001} + w_{10001} + w_{11011} \\
&\quad - w_{10000} - w_{01000} - w_{00010} - w_{00001} - w_{10011} - w_{11001} - w_{01011} - w_{11010} \\
u_{*0***} &= w_{00000} + w_{10100} + w_{00110} + w_{00011} + w_{10010} + w_{00101} + w_{10001} + w_{10111} \\
&\quad - w_{10000} - w_{00100} - w_{00010} - w_{00001} - w_{10011} - w_{10101} - w_{00111} - w_{10110} \\
u_{0****} &= w_{00000} + w_{01100} + w_{00110} + w_{00011} + w_{01010} + w_{00101} + w_{01001} + w_{01111} \\
&\quad - w_{01000} - w_{00100} - w_{00010} - w_{00001} - w_{01011} - w_{01101} - w_{00111} - w_{01110}
\end{aligned}$$

Geometrically, these interactions involve the 16 vertices of the specified 4-cubes inside  $G$ . The last standard interaction is simply given by the following expression involving all five species and all 32 fitness values:

$$\begin{aligned}
u_{*****} &= u_{11111} \\
&= w_{00000} - w_{00001} - w_{00010} - w_{00100} - w_{01000} - w_{10000} + w_{11000} \\
&\quad + w_{10100} + w_{10010} + w_{10001} + w_{01100} + w_{01010} + w_{01001} + w_{00110} \\
&\quad + w_{00101} + w_{00011} - w_{11100} - w_{11010} - w_{11001} - w_{10110} - w_{10101} \\
&\quad - w_{10011} - w_{01110} - w_{01101} - w_{01011} - w_{00111} + w_{11110} + w_{11101} \\
&\quad + w_{11011} + w_{10111} + w_{01111} - w_{11111}.
\end{aligned}$$

176 Geometrically, this test involves all vertices of  $G$ . In Figure 1 below we highlight the regions delimited  
177 by the vertices defining the above 26 standard tests inside a projection of the five cube  $G$ .

For example, in a system with three bacterial species consisting of the following 8 bacterial combinations  $G = \{000, 001, 010, 100, 110, 011, 101, 11\}$  there are three standard tests involving two out of three species:

$$\begin{aligned}
u_{**0} &= w_{000} + w_{110} - w_{100} - w_{010} \\
u_{*0*} &= w_{000} + w_{101} - w_{100} - w_{001} \\
u_{0**} &= w_{000} + w_{011} - w_{010} - w_{001}
\end{aligned}$$

178 together with the 3-way interaction  $u_{111}$ , described above.

On the other hand, in an  $n$ -species system there are

$$\sum_{2 \leq l \leq n} \binom{n}{l} \tag{2}$$

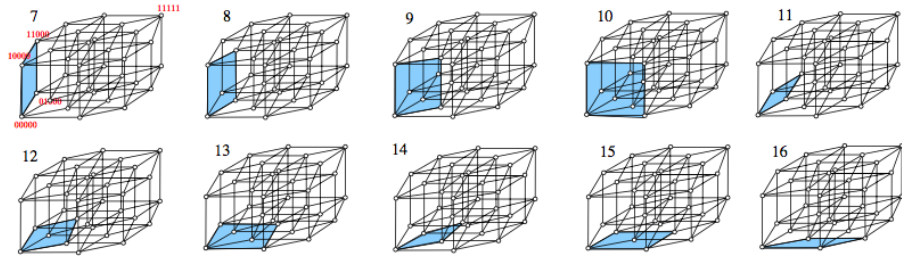

(A) The 10 standard 2-way interactions

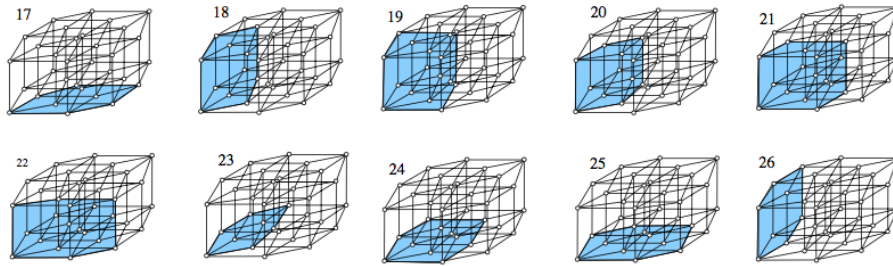

(B) The 10 standard 3-way interactions

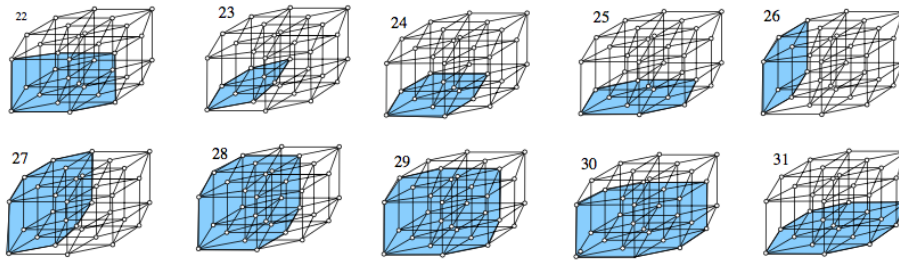

(C) The 5 standard 4-way interactions

Figure 1: **Geometric description of the 26 standard interactions.** The highlighted regions inside the projections of the 5-dimensional cube indicate the vertices involved in the corresponding test. The interaction  $u_{11111}$  is defined by all 32 vertices and therefore omitted.

179 standard tests.

## 180 5.2 Contextual tests

181 In the following, we compare the results of the standard tests with the results of the contextual tests in  
 182 a five species system and for various phenotypes. The contextual tests include **interaction coordinates**,  
 183 which are generalizations of the standard test, and **circuits**, which are linear combinations of the interaction  
 184 coordinates.

In an  $n$ -species system there are

$$\sum_{2 \leq l \leq n} \binom{n}{l} 2^{n-l} (2^l - l - 1) + \binom{n}{3} 2^{n-3} \cdot 14 - \sum_{2 \leq l \leq n} \binom{n}{l} \quad (3)$$

185 different contextual test. Compare with Equation (2) and (6).

186 In this section, we make precise the notion of interaction coordinates and circuits, see also Glossary [2]  
 187 for binary systems of  $n$ -bacterial species,  $\{0, 1\}^n$ . We first describe these formulas abstractly for arbitrary  
 188 values of  $n$  and later focus on the case where there are only 5 bacterial species.

## 189 5.3 Interaction coordinates

For a fixed  $n \in \mathbb{N}$ , let  $j_1, j_2, \dots, j_n \in \{0, 1\}^n$  be a binary strings of lengths  $n$ . We view each such string as  
 a vertex of an  $n$ -dimensional cube. Let  $i = i_1, i_2, \dots, i_n \in \{0, 1\}^n$  be such a binary string with at least two  
 coordinates  $i_j, i_k$  being 1. The interaction coordinates  $u_i$  can be defined (up to a scalar) in the following  
 way:

$$u_{i_1, i_2, \dots, i_n} := \frac{1}{2^n - 1} \sum_{j_1=0}^1 \sum_{j_2=0}^1 \dots \sum_{j_n=0}^1 (-1)^{i_1 j_1 + i_2 j_2 + \dots + i_n j_n} w_{j_1 j_2 \dots j_n} \quad (4)$$

190 where  $w_-$  are values of a corresponding phenotype and indexed by the vertices of the  $n$ -dimensional cube.  
 191 There are  $2^n - n - 1$  interaction coordinates. Moreover, these coordinates are linearly independent and  
 192 form a vector space basis of the interaction space. Interaction coordinates include the so called higher-order  
 193 interactions arising by introducing the species not present under the lower dimensional standard tests. For  
 194 instance, we previously noted that there are 10 possible pairs of species in the 5-species system. For any of  
 195 these pairs, we can consider how the interaction between the pair changes in the presence of a third, fourth,  
 196 or fifth species.

## 197 5.4 Circuits

198 Certain linear combinations of interaction coordinates give rise to circuits, that is minimal dependency sets  
 199 of configurations of points in a space of dimension  $n$ , see [2]. Among all possible circuits, we will focus on  
 200 circuits that have a simple biological meaning and that originate from the following circuits defined for the

201 3-cube in [2]:

$$\begin{aligned}
a &:= u_{110} + u_{111} = w_{000} - w_{010} - w_{100} + w_{110} \\
b &:= u_{110} - u_{111} = w_{001} - w_{011} - w_{101} + w_{111} \\
c &:= u_{101} + u_{111} = w_{000} - w_{001} - w_{100} + w_{101} \\
d &:= u_{101} - u_{111} = w_{010} - w_{011} - w_{110} + w_{111} \\
e &:= u_{011} + u_{111} = w_{000} - w_{001} - w_{010} + w_{011} \\
f &:= u_{011} - u_{111} = w_{100} - w_{101} - w_{110} + w_{111} \\
\\
g &:= u_{110} + u_{101} = w_{000} - w_{011} - w_{100} + w_{111} \\
h &:= u_{110} - u_{101} = w_{001} - w_{010} - w_{101} + w_{110} \\
i &:= u_{110} + u_{011} = w_{000} - w_{010} - w_{101} + w_{111} \\
j &:= u_{110} - u_{011} = w_{001} - w_{011} - w_{100} + w_{110} \\
k &:= u_{101} + u_{011} = w_{000} - w_{001} - w_{110} + w_{111} \\
l &:= u_{101} - u_{011} = w_{010} - w_{011} - w_{100} + w_{101} \\
\\
m &:= -u_{011} - u_{101} - u_{110} - u_{111} = w_{001} + w_{010} + w_{100} - w_{111} - 2w_{000} \\
n &:= -u_{011} - u_{101} - u_{110} + u_{111} = w_{011} + w_{101} + w_{110} - w_{000} - 2w_{111} \\
o &:= u_{011} + u_{101} - u_{110} - u_{111} = w_{010} + w_{100} + w_{111} - w_{001} - 2w_{110} \\
p &:= u_{011} + u_{101} - u_{110} + u_{111} = w_{000} + w_{011} + w_{101} - w_{110} - 2w_{001} \\
q &:= u_{011} - u_{101} + u_{110} - u_{111} = w_{001} + w_{100} + w_{111} - w_{010} - 2w_{101} \\
r &:= u_{011} - u_{101} + u_{110} + u_{111} = w_{000} + w_{011} + w_{110} - w_{101} - 2w_{010} \\
s &:= -u_{011} + u_{101} + u_{110} + u_{111} = w_{000} + w_{101} + w_{110} - w_{011} - 2w_{100} \\
t &:= -u_{011} + u_{101} + u_{110} - u_{111} = w_{001} + w_{010} + w_{111} - w_{100} - 2w_{011}.
\end{aligned}$$

202 Linear combinations of these circuits, which we do not consider here, yield more interactions contained in  
203 the interaction space. Biological and geometric interpretations of these circuits were first given in [2, §.3]  
204 for the genetic setting. For instance, circuits  $m$  to  $t$  relate the three-way interactions to the total two-way  
205 interactions. Examining the equation for  $m$ , we see that it is equal to the sum of the phenotype terms for  
206 each of the single species combinations minus the sum of the three-species association and the germ free  
207 flies. Similarly in  $n$ , the sum of the two-species combinations is compared to the sum of the three-species  
208 combination and the germ free flies. The biological interpretation is that  $m$  tells us whether the single species  
209 associations predict the three-species combination, and  $n$  tells us whether the two-species associations predict  
210 the three-species combination. Of note, the signs of the circuits  $m$  to  $t$  do not have a two-locus interpretation,  
211 making them truly of higher-order.

212 Later we will see that the above circuits become circuits of the 5-cube, in a similar way as we described  
213 above for standard tests. Varying the presence, resp. absence, of the bystander species gives rise to a new  
214 class of circuits inside the 5-cube which have an established biological meaning.

## 215 5.5 Recursively constructing higher order interactions from lower order inter- 216 actions

217 We now describe interaction coordinates in lower dimensional cubes and how the circuits  $a$ - $t$  extend to  
218 interaction formulas in higher dimensional cubes. In light of the data analyzed in this paper, we focus on  
219 the case of five bacterial species. However, the approach we present here easily extends to systems with  
220  $n$ -bacterial species. See discussion at the end of this section.

For instance, the two-way interaction

$$u_{11} = w_{00} + w_{11} - w_{01} - w_{10}$$

extends to the following  $80 = 10 \cdot 2^3$  different interaction formulas in a five species system.

$$\begin{aligned}
\alpha_{**klm} &= w_{00klm} + w_{11klm} - w_{01klm} - w_{10klm} \\
\alpha_{*k*lm} &= w_{0k0lm} + w_{1k1lm} - w_{0k1lm} - w_{1k0lm} \\
\alpha_{*kl*m} &= w_{0kl0m} + w_{1kl1m} - w_{0kl1m} - w_{1kl0m} \\
\alpha_{*klm*} &= w_{0klm0} + w_{1klm1} - w_{0klm1} - w_{1klm0} \\
\alpha_{k**lm} &= w_{k00lm} + w_{k11lm} - w_{k01lm} - w_{k10lm} \\
\alpha_{k*lm*} &= w_{k0l0m} + w_{k1l1m} - w_{k0l1m} - w_{k1l0m} \\
\alpha_{k*lm*} &= w_{k0lm0} + w_{k1lm1} - w_{l0lm1} - w_{k1lm0} \\
\alpha_{kl**m} &= w_{kl00m} + w_{kl11m} - w_{kl01m} - w_{kl10m} \\
\alpha_{kl*m*} &= w_{kl0m0} + w_{kl1m1} - w_{kl0m1} - w_{kl1m0} \\
\alpha_{klm**} &= w_{klm00} + w_{klm11} - w_{klm01} - w_{klm10},
\end{aligned} \tag{5}$$

where \*\* indicates two species out of five. The remaining indices  $k, l, m$  are then either 0 or 1, and all possible  $2^3$  combinations are allowed. Similarly, extending to the five species system, the four interaction coordinates  $u_{111}, u_{110}, u_{011}, u_{101}$  are defined by (4) above in the following fashion:

$$\begin{aligned}
\beta_{***kl} &= \sum_{j_1=0}^1 \sum_{j_2=0}^1 \sum_{j_3=0}^1 (-1)^{*j_1+*j_2+*j_3} w_{j_1j_2j_3kl} \\
\beta_{**k*l} &= \sum_{j_1=0}^1 \sum_{j_2=0}^1 \sum_{j_4=0}^1 (-1)^{*j_1+*j_2+*j_4} w_{j_1j_2kj_4l} \\
\beta_{**kl*} &= \sum_{j_1=0}^1 \sum_{j_2=0}^1 \sum_{j_5=0}^1 (-1)^{*j_1+*j_2+*j_5} w_{j_1j_2klj_5} \\
\beta_{*k*l*} &= \sum_{j_1=0}^1 \sum_{j_3=0}^1 \sum_{j_5=0}^1 (-1)^{*j_1+*j_3+*j_5} w_{j_1kj_3lj_5} \\
\beta_{*kl**} &= \sum_{j_1=0}^1 \sum_{j_4=0}^1 \sum_{j_5=0}^1 (-1)^{*j_1+*j_4+*j_5} w_{j_1klj_4j_5} \\
\beta_{k**l**} &= \sum_{j_2=0}^1 \sum_{j_4=0}^1 \sum_{j_5=0}^1 (-1)^{*j_2+*j_4+*j_5} w_{kj_2lj_4j_5} \\
\beta_{kl***} &= \sum_{j_3=0}^1 \sum_{j_4=0}^1 \sum_{j_5=0}^1 (-1)^{*j_3+*j_4+*j_5} w_{klj_3j_4j_5} \\
\beta_{**k**l} &= \sum_{j_1=0}^1 \sum_{j_3=0}^1 \sum_{j_4=0}^1 (-1)^{*j_1+*j_3+*j_4} w_{j_1kj_3j_4l} \\
\beta_{k**l*} &= \sum_{j_2=0}^1 \sum_{j_3=0}^1 \sum_{j_5=0}^1 (-1)^{*j_2+*j_3+*j_5} w_{kj_2j_3lj_5} \\
\beta_{k***l} &= \sum_{j_2=0}^1 \sum_{j_3=0}^1 \sum_{j_4=0}^1 (-1)^{*j_2+*j_3+*j_4} w_{kj_2j_3j_4l}.
\end{aligned}$$

221 As before, the notation \*\*\* indicates three species out of five. The remaining indices  $k, l$  are assumed to  
222 be fixed and either  $kl = 00, kl = 01, kl = 11$  or  $kl = 10$ . The biological significance of these interactions is  
223 examined in the main text Figs. 5 and S12.

224 We also extend the circuits  $a-t$  to the five species setting. To do this, it is enough to consider the circuit  
225 formulas  $a-t$  given above, and replace the  $u_{i_1, i_2, i_3}$  with the corresponding extended interaction coordinates.



226 Similarly one also extends the  $2^4 - 5 = 11$  interaction coordinates  $u_{i_1, \dots, i_4}$  defined by equation (4) and  
 227  $n = 4$ .

Thus in a 5-species system, there are

$$\sum_{2 \leq l \leq 5} \binom{5}{l} 2^{5-l} (2^l - l - 1) = 376$$

interaction coordinates together with

$$\binom{5}{3} 2^{5-3} \cdot 20 = 800$$

228 possible extensions of the circuits  $a-t$ . Notice however that the circuits  $a-f$  are two way interactions extended  
 229 to the three species setting, hence only the circuits  $g-t$  provide new possible extended circuits. It follows, that  
 230 only 560 of these extended circuits are different among each other and disjoint from the previous interaction  
 231 coordinates. Thus, together this approach yields 936 different extended interaction coordinates and circuits.

In an  $n$ -species system, the approach described above gives

$$\sum_{2 \leq l \leq n} \binom{n}{l} 2^{n-l} (2^l - l - 1) + \binom{n}{3} 2^{n-3} \cdot 14 \quad (6)$$

232 different extended interaction coordinates together with the disjoint set of all possible and different extensions  
 233 of the circuits  $g-t$ . As for the five species setting, in equation (6) we omit the circuits  $a-f$ .

234 The biological and geometric interpretation of the interactions enumerated in equation (6) can be deduced  
 235 from the lower dimensional interpretations given in [2], for the three species case  $\{0, 1\}^3$ . Clearly, more  
 236 interactions might be obtained by considering linear combinations of the above formulas.

## 237 6 Significance testing of interactions

Despite the standard and contextual tests being disjoint families, the two sets of tests are not statistically  
 independent as they derive from the same underlying data sets. In order to determine whether a test is  
 non-zero, we took the uncertainty in the phenotype measurements into account and devised a statistical test  
 as follows. Since the phenotype measurements were computed together with their standard errors, we can  
 compute the corresponding propagation of error for each test (standard and contextual). This error was  
 determined by taking the square root of the sum of squares of the standard errors involved in each test. For  
 example, for  $u_{11}$ , the propagated standard error  $s(u_{11})$  is

$$s(u_{11}) = \sqrt{s_{00}^2 + s_{11}^2 + s_{01}^2 + s_{10}^2}$$

238 where  $s_{00}$  denotes the standard error of  $w_{00}$ , etc.

239 Moreover, if different formulas give rise to the same interaction term, we considered only the formula  
 240 yielding the smallest propagation of error, that is, the formula involving the least number of operations. For  
 241 instance, each circuit test  $a, \dots, t$  can be defined in two ways, one involving a difference between interaction  
 242 coordinates and a direct way see [2]. The direct way involves less operations, and therefore a smaller  
 243 propagated error.

244 We then determined significance in the following way. We assumed that each interaction formula (test)  
 245 comes from a Gaussian distribution with mean 0 and standard deviation given by the propagated error.  
 246 For each interaction  $u$ , we performed a two-sided null hypothesis test. The null hypothesis states that the  
 247 true value of the interaction is  $u = 0$ , versus the alternative hypothesis that  $u \neq 0$ . We then considered an  
 248 interaction statistically significant if the  $p$ -value was below 0.05. This means, that if the null hypothesis was  
 249 true, the probability of obtaining the result of the interaction  $u$  we computed would be 5%.

250 To account for the multiple comparisons, we corrected all the above  $p$ -values using the Benjamini-  
 251 Hochberg multiple testing correction procedure. In this way, we are able to control the false discovery  
 252 rate at 5%; that is, we eventually considered an interaction statistically significant if the corrected  $p$ -value  
 253 falls below 0.05.

254

## 7 Supplemental Results of Interaction Testing

255

In this section we summarize the main findings we obtained through the computations described above.

256

In the first part, we focus on the smaller family of standard tests and on the second part we compare the

257

outcomes of these tests with contextual tests. In the last part, we focus on specific standard and contextual

258

tests which examine how these test change as the number of species increases.

259

### 7.1 Computed standard tests

| Nr. | Combination | Daily Fecundity | Development  | Bacterial load | Time to death |
|-----|-------------|-----------------|--------------|----------------|---------------|
| 7   | $u_{**000}$ | <b>1.19</b>     | <b>-0.67</b> | <b>-294036</b> | 5.23          |
| 8   | $u_{*0*00}$ | 1.15            | <b>-0.71</b> | <b>279946</b>  | 3.05          |
| 9   | $u_{*00*0}$ | 0.17            | <b>-0.80</b> | -58439         | <b>6.09</b>   |
| 10  | $u_{*000*}$ | 0.51            | <b>-0.75</b> | 39002          | <b>6.92</b>   |
| 11  | $u_{0**00}$ | 0.55            | -0.34        | 50689          | -0,72         |
| 12  | $u_{0*0*0}$ | -0.58           | 0.16         | -127406        | -1.77         |
| 13  | $u_{0*00*}$ | 0.74            | 0.08         | -83144         | 4.70          |
| 14  | $u_{00**0}$ | <b>-1.40</b>    | -0.42        | -142987        | 2.92          |
| 15  | $u_{00*0*}$ | <b>-1.44</b>    | 0.00         | <b>-139566</b> | <b>8.58</b>   |
| 16  | $u_{000**}$ | <b>-1.41</b>    | -0.09        | <b>-253460</b> | <b>5.32</b>   |
| 17  | $u_{***00}$ | <b>1.73</b>     | -0.63        | 279224         | 3.07          |
| 18  | $u_{**0*0}$ | -0.65           | -0.63        | 78573          | 6.81          |
| 19  | $u_{***0*}$ | <b>1.65</b>     | <b>-0.96</b> | 40900          | <b>9.24</b>   |
| 20  | $u_{*0**0}$ | 0.14            | <b>-0.92</b> | 163152         | 5.15          |
| 21  | $u_{*0*0*}$ | 1.49            | <b>-0.92</b> | <b>252978</b>  | <b>8.06</b>   |
| 22  | $u_{*00**}$ | 0.27            | <b>-0.88</b> | -154624        | <b>9.23</b>   |
| 23  | $u_{0****}$ | -1.16           | -0.30        | 155885         | 0.9           |
| 24  | $u_{0*0*0}$ | 0.40            | -0.21        | -7395          | 7.37          |
| 25  | $u_{0*0**}$ | -0.51           | -0.25        | -80465         | 0.42          |
| 26  | $u_{00***}$ | -1.61           | -0.59        | -153646        | 4.08          |
| 27  | $u_{*****}$ | -0.74           | -0.63        | <b>525575</b>  | 6.69          |
| 28  | $u_{***0*}$ | <b>2.53</b>     | -0.96        | 268147         | <b>13.48</b>  |
| 29  | $u_{**0**}$ | 0.42            | <b>-1.04</b> | 105278         | <b>14.82</b>  |
| 30  | $u_{*0***}$ | 0.72            | <b>-1.17</b> | -24224         | 5.89          |
| 31  | $u_{0****}$ | -1.00           | -0.59        | 130387         | 0.11          |
| 32  | $u_{*****}$ | 0.95            | <b>-1.42</b> | 373239         | <b>13.35</b>  |

Table 1: **Result for the 26 standard tests** computed on the raw fecundity per day (daily fec), bacterial load (CFU), time to death (time d) and development rate (dev) data. The first two columns indicate the performed standard tests separated according to the number of bacterial species present in the fly gut (the type of species is indexed by the position of the symbol \*). Results in bold reached statistical significance ( $p < 0.05$ ) after BH-multiple comparison correction. The geometric description of these tests is illustrated in Figure 1.

260

To summarize the results of the standard test presented above in Table 1 we averaged the results of all the

261

standard 2-, 3-, 4- and 5-way interaction at each level of species diversity (Table 2). Thus, we let  $a_2$  be the

262

sum of all standard 2-way interactions  $u_{**}$  divided by the number of 2-way standard interactions (which is

263

10). Similarly, we calculated  $a_3$ ,  $a_4$  and  $a_5$ .

| Term  | CFU       | dev    | fd     | td    | unif   | nor   |
|-------|-----------|--------|--------|-------|--------|-------|
| $a_2$ | -72940.29 | -0.353 | -0.053 | 4.083 | -0.197 | 1.477 |
| $a_3$ | 57458     | -0.628 | 0.174  | 5.433 | -0.112 | 1.585 |
| $a_4$ | 201032    | -0.878 | 0.385  | 8.198 | 0.170  | 2.216 |
| $a_5$ | 373239    | -1.419 | 0.947  | 13.35 | 0.650  | 4.080 |

Table 2: The average interactions terms  $a_2, \dots, a_5$  for the standard tests and the four phenotypes of number of bacterial cells per fly (CFU), development time in days (dev), fecundity per day (fd), time to death in days (td), as well as for synthetic data from a uniform distribution on  $[0, 1]$  and from a standard normal distribution.

From Table 2 we see that the average interaction tends to increase with the number of terms in the standard formulas. We also note that the sign of the interaction (positive or negative) is already determined by the sign of the average 4-way interactions (or at even lower dimensions). Together with the results of Table 2, we also consider the average interaction of the standard 2-,3-, 4- and 5-way interactions normalized by the number of present bacterial species. That is  $n_2 = a_2/2$ ,  $n_3 = a_3/3$ ,  $n_4 = a_4/4$  and  $n_5 = a_5/5$ , see Table 3 for the corresponding results.

| Term  | CFU    | dev    | fd     | td   | unif   | nor   |
|-------|--------|--------|--------|------|--------|-------|
| $n_2$ | -36470 | -0.177 | -0.027 | 2.04 | -0.099 | 0.739 |
| $n_3$ | 19153  | -0.209 | 0.058  | 1.81 | -0.037 | 0.528 |
| $n_4$ | 50258  | -0.220 | 0.096  | 2.05 | 0.043  | 0.554 |
| $n_5$ | 74648  | -0.284 | 0.189  | 2.67 | 0.130  | 0.816 |

Table 3: The normalized terms  $n_2, \dots, n_5$  for the standard tests, normalized by the number of bacteria present for the four phenotypes of number of bacterial cells per fly (CFU), development time in days (dev), fecundity per day (fd), time to death in days (td), as well as for synthetic data from a uniform distribution on  $[0, 1]$  and from a standard normal distribution.

It is clear from examining the average interaction values (i.e. the terms  $a_2, \dots, a_5$  in Table 2) that the total contribution increases as the number of species increases. However, when we normalize these average values to the number of species, we see a more constant contribution for each individual species, see Table 3.

Thus, if interactions quantify the degree to which we cannot predict the phenotype of the microbiome when a new species is added, the microbiome becomes less predictable as we add additional species. However, on a per-species basis, the degree of unpredictability stays constant. And if we consider the number of combinations, the results of the interaction tends to increase together with its statistical significance, in this sense the result of the interaction tends to become more predictable. Thus, while our analysis indicates that the microbiome problem increases in complexity as more species are added, there is reason for hope. For instance, if we discover a rule that determines *a priori* which contextual test will be additive (versus showing an interaction), the predictability of the microbiome will increase as we add species. However, our fundamental conclusion is that the relationships between species rather than the species themselves produce increasingly complex interactions. Therefore, our efforts at building a predictable framework should focus on the interactions between species as much as on the individual species themselves.

## 7.2 Comparing the relative importance of individual bacterial species versus their interactions in determining physiological traits

When we compare the distributions of the raw data with the results of the standard tests, we see that linear trends in the raw data do not necessary translate to the same trends in the outcomes of standard test (see Fig. S13). For example, consider time to death: the raw data indicates that increasing the number of bacterial species results in a decrease in the time to death (see Fig. 2). However, the standard tests indicate that interaction magnitude tends to increase with the number of species involved (see Table 2), and hence with the numbers of terms occurring in the standard tests. Finally, from the data in the Fig. S13, we deduce that the above observations remain valid by considering the (fewer) standard tests which reached statistical significance rather than considering all of them. For completeness, we also computed Spearman’s correlation coefficients on all 26 standard tests, and on the raw CFUs, development rate, daily fecundity, time to death data. See Table 4. The tests in bold in Table 4 reached significance at  $p < 0.05$ . See Table 5 for the results of the normality test (Shapiro-Wilk).

|                  | CFU                         | Development                 | Daily fecundity      | Time to death               |
|------------------|-----------------------------|-----------------------------|----------------------|-----------------------------|
| CFU              | -                           | <b>-0.51</b> ( $p=0.0028$ ) | 0.12( $p=0.5031$ )   | <b>-0.49</b> ( $p=0.0242$ ) |
| Development rate | <b>-0.43</b> ( $p=0.0272$ ) | -                           | -0.28 ( $p=0.1246$ ) | <b>0.40</b> ( $p=0.0242$ )  |
| Daily fecundity  | 0.39 ( $p=0.0463$ )         | <b>-0.56</b> ( $p=0.0031$ ) | -                    | <b>-0.41</b> ( $p=0.0202$ ) |
| Time to death    | 0.15 ( $p=0.4622$ )         | <b>-0.61</b> ( $p=0.0010$ ) | 0.32 ( $p=0.1082$ )  | -                           |

Table 4: Spearman’s correlation coefficients and significance level for all 26 standard tests and raw data measurements. Below the diagonal, we indicate Spearman’s correlation coefficients and the corresponding  $p$ -values for all standard test (26 samples), similarly above the diagonal for the raw data (32 data points). Bold numbers indicate statistically significant correlations.

## 7.3 Results for all computed interactions from Figs. 4, 5, and S12

In this section, we describe the results contained in Figs. 4, 5, and S12 in the main text, obtained from computing the 910 contextual tests together with 26 standard tests for the phenotypes of CFUs, development rate, daily fecundity, time to death. We found many significant positive and negative interactions among bacterial species in fruit flies. Moreover, we found that for some phenotypes (CFUs and daily fecundity) the standard tests fully capture the interaction trends measured by the contextual tests. However, for development rate and time to death we found that many new significant tests arise when considering contextual tests, indicating that the impacts of the bacterial community on the fly depend more on the context of which other bacterial species are present. Finally, comparing the Table 4 with Table 6 we found correlated interactions between phenotypes where neither the raw measurements nor the standard tests were correlated. The complete correlations between the measured phenotypes for the same interactions are shown in Figure S13. This finding suggests that interactions more than the individual species themselves shape host physiology.

One of the major findings of this work is that interactions between bacteria and their effects on the host are highly dependent on context. By comparing the standard tests to the contextual tests (*e.g.* Figs. 4, 5 and S12), we quantitatively demonstrated this point for specific combinations of bacteria. Here, we extend that analysis to compare the two probability distributions corresponding to standard and contextual tests to ask whether they come from the same continuous distributions. The set of contextual tests does not include the set of standard tests we computed. However, since standard tested and contextual tests are computed from the same underlying data, the two sets of tests are statistically dependent. To test the difference between the distributions, we performed a two-sample and two-sided Kolmogorov-Smirnov (KS) test. The results of the KS test for the phenotypes of bacterial CFUs ( $D = 0.26264$ ,  $p$ -value = 0.06117) and daily fecundity ( $D = 0.17912$ ,  $p$ -value = 0.392) indicate that there is little evidence to reject the null-hypothesis of standard tests and contextual tests coming from the same distributions. On the other hand, the results of the KS test for the phenotypes of development time ( $D = 0.58022$ ,  $p$ -value =  $8.1 \cdot 10^{-08}$ ) and time to death ( $D = 0.46681$ ,

321  $p$ -value =  $1.252 \cdot 10^{-05}$ ) suggest that it is unlikely that the standard tests and contextual tests come from  
 322 the same distributions. Thus, for these phenotypes, the difference between the standard and contextual tests  
 323 strongly supports the notion that interactions are highly dependent on context not just for specific cases but  
 324 also on a global scale.

325 For completeness, we also ask if any of the standard tests, contextual tests and significant standard tests  
 326 come from normal distributions. To test this hypothesis we performed a Shapiro-Wilk test. The results are  
 327 summarized in Table 5. We see that for the contextual tests (significant after multiple testing) the Shapiro-  
 328 Wilk tests reach significance. We then conclude that the corresponding distributions fail the normality  
 329 test.

|                                    | W       | $p$ -value             |
|------------------------------------|---------|------------------------|
| <b>CFU</b>                         | 0.94732 | $2.2 \cdot 10^{-16}$   |
| <b>CFU STD</b>                     | 0.97287 | 0.6985                 |
| <b>CFU significant</b>             | 0.91657 | $8.131 \cdot 10^{-9}$  |
| <b>Development</b>                 | 0.97131 | $2.092 \cdot 10^{-12}$ |
| <b>Development STD</b>             | 0.97793 | 0.8272                 |
| <b>Development significant</b>     | 0.87521 | 0.0007663              |
| <b>Daily fecundity</b>             | 0.96783 | $2.727 \cdot 10^{-13}$ |
| <b>Daily fecundity STD</b>         | 0.96159 | 0.4238                 |
| <b>Daily fecundity significant</b> | 0.88623 | $1.58 \cdot 10^{-07}$  |
| <b>Time to death</b>               | 0.99524 | 0.006241               |
| <b>Time to death STD</b>           | 0.96781 | 0.5673                 |
| <b>Time to death significant</b>   | 0.87586 | $9.06 \cdot 10^{-09}$  |

Table 5: **Shapiro-Wilk-Test**. For each phenotype we summarized the test statistic and the corresponding  $p$ -value. The  $p$ -values for all significant contextual tests (significant after adjusting  $p$ -values with the BH-multiple testing correction procedure) reached a significance level. We conclude that there is evidence that the various distributions are non-normal. 'STD' appended to a label indicates the interactions tests where standard, whereas if 'STD' is not appended, it is for the contextual tests. If 'significant' is appended, it means that the contextual tests we consider are the ones that reached statistical significance ( $p < 0.05$ ) after BH-multiple testing correction.

|                        | CFU                           | Development                   | Daily fecundity               | Time to death                 |
|------------------------|-------------------------------|-------------------------------|-------------------------------|-------------------------------|
| <b>CFU</b>             | -                             | <b>-0.18</b> ( $p < 0.0005$ ) | <b>0.18</b> ( $p < 0.0005$ )  | <b>-0.13</b> ( $p < 0.0005$ ) |
| <b>Development</b>     | <b>-0.97</b> ( $p < 0.0005$ ) | -                             | <b>-0.37</b> ( $p < 0.0005$ ) | -0.09 ( $p = 0.0037$ )        |
| <b>Daily fecundity</b> | <b>0.54</b> ( $p < 0.0005$ )  | <b>-0.91</b> ( $p < 0.0005$ ) | -                             | <b>-0.09</b> ( $p = 0.0048$ ) |
| <b>Time to death</b>   | <b>-0.78</b> ( $p < 0.0005$ ) | -0.10 ( $p = 0.8729$ )        | <b>-0.84</b> ( $p < 0.0005$ ) | -                             |

Table 6: **Spearman's correlation coefficients and significance level for all tested interactions**. Below the diagonal, we indicate Spearman's correlation coefficients and the corresponding  $p$ -values for statistically significant interactions ( $p < 0.05$ ) after multiple testing correction with 5 to 187 pairwise complete comparisons). Similarly, above the diagonal we compute correlations for all interactions regardless of statistical significance (936 data points).

## 8 Discussion of Interaction Tests

Overall, when we utilize all of the interactions tests, including the contextual tests, we see more significant interactions for the different phenotypes. Consistently, we see that the same interactions have correlated values across the different phenotypes that we measured. A simple explanation is that the rich microbial interactions underlying these phenotypes affect some central aspect of fly physiology that is reflected in multiple life history traits.

With the goal of quantifying higher order interactions we computed various interaction formulas. We also extracted a set of 26 interaction formulas (which we call 'standard tests') and compared them with the results of 910 (different) 'contextual' interactions. We found that for certain phenotypes the standard interactions approximate well the distribution of the other more involved contextual tests. Since the number of all possible interactions is large, and unknown in general, it is important to find a more parsimonious approach based on fewer tests that still capture the main interaction signals. This is particularly advisable since the number of all possible interactions increases with the number of species and the relative contributions coming from each test are mostly small. Moreover, analyzing smaller sets of particularly expressive and biologically interpretable interactions would not only be computationally more efficient, but also would facilitate the comparisons of higher order tests arising in different biological contexts (for example infected fruit flies, or fruit flies treated with antibiotics). The approach we propose here to define higher order interactions, as well as the computations we carried out, easily extends to settings with more species. Thus, our methodology can provide a way to reduce the experimental burden of examining interactions in the microbiome involving fewer experiments.

We also note that our computations are based on discrete data points. However, since the nature of the phenotypes we analyzed is continuous, it would be interesting to extend our studies and consider a fitting continuous setting. Finally, our computations and conclusion consider the propagation of uncertainty in phenotype measurements, and it would be interesting to develop a quantitative statistical framework better accounting for possible sensible noise in the data set.

A challenge in the microbiome is to develop a quantitative framework that applies both to the detailed interactions between single species as well as to complex assemblages containing hundreds of species. We believe that our approach is simple enough to be scalable to higher dimensions, and by identifying groups of species that behave as single loci (as detected in specific contextual tests, which are lower dimensional projections of the  $n$ -cube), we can reduce the dimensionality of complex assemblages through this combinatorial framework.

## 9 Averaging model for prediction of high-diversity traits with low-diversity measurements (Figure 2)

### 9.1 Single-species mixing model

In Figure 2 of the main text, the measured traits appear to converge as bacterial diversity increases. To determine whether this convergence could be attributed to a mixing effect, we constructed a presence-absence "averaging model," in which the trait of a bacterial combination is predicted to be the average of the single-bacteria traits. Formally, we assume that a trait  $f$  is a function of the types of bacteria in the microbiome  $S$ , and that this microbiome is composed of bacteria  $s_i$  for  $i \in 1, \dots, 5$  such that the microbiome can be decomposed into these individual species. For example,  $S = 10110$  would contain the species  $s_1$ ,  $s_3$ , and  $s_4$ . As in the rest of the Math Supplement, the components  $i = 1, \dots, 5$  respectively correspond to the bacteria LP, LB, AP, AT, and AO. The diversity  $N$  of a bacterial combination is given by the cardinality of  $S$ ,  $N = |S|$ .

Then, the averaging model predicts that

$$f(S) = \frac{1}{N} \sum_{s_i \in S} f(s_i). \quad (7)$$

This allows us to predict the traits of higher-diversity bacterial combinations as the average of single-species traits (e.g.  $f(10001) = 1/2 (f(10000) + f(00001))$ ). With this model we predict fly fecundity, time to death,

376 development time, and bacterial load, and compare the predicted values to the measured experimental values.  
377 We display the difference between the predicted and measured values in Figure 2 of the main text.

378 To evaluate whether this averaging model captures the observed trait measurements, we asked how often  
379 the prediction over or underestimated the measured value. If there was a significant tendency to over or  
380 underestimate, this would indicate that the mixing model is not sufficient to predict the data. We found  
381 that this model significantly under-predicted daily fecundity (20 of 26 negative,  $p=9e-3$ , binomial test) and  
382 bacterial load (26 of 26 negative,  $p=3e-8$ , binomial test), and significantly over-predicted time to death (22  
383 of 26 positive,  $p=5e-4$ , binomial test) and development time (25 of 26 positive,  $p=8e-7$ , binomial test).

## 384 9.2 Pairwise species mixing model

385 Next, we generalized the averaging model of the previous subsection by averaging the traits of pairs of  
386 species, rather than the traits of individual species. We decompose a microbiome  $S$  into its constitutive  
387 pairs of bacteria  $r_{ij}$ , so that if a microbiome consists of the  $N$  bacteria, then for all  $N(N-1)/2$  pairs of  
388 those bacteria  $s_i$  and  $s_j$  that exist in the microbiome, the element  $r_{ij}$  will be in  $S$ . Then, the pairwise  
389 averaging model predicts that a trait  $f(S)$  will be

$$f(S) = \frac{2}{N(N-1)} \sum_{r_{ij} \in S} f(r_{ij}). \quad (8)$$

390 For example, the pairwise averaging model would predict  $f(11001) = \frac{1}{3}(f(11000) + f(10001) + f(01001))$ .  
391 In Figure 2 of the main text we compare the predictive ability of the pairwise averaging model to that of  
392 the single-species averaging model.

## 393 9.3 Comparison of single-species and pairwise mixing model predictions

394 In Figure 2 we display the difference between experimentally measured traits and the mixing model predic-  
395 tions (for the single-species and pairwise cases). We plot 95% confidence intervals for each difference between  
396 experiment and prediction. If the confidence interval of this difference does not include 0, then that predic-  
397 tion significantly deviates from the observed measurement. By counting how many trait measurements were  
398 or were not captured by the 95% confidence intervals of each model, we achieve a measure of the accuracy  
399 of each model. In order to compare the two models, we only consider their predictive ability for diversity 3  
400 or larger.

401 We found that, across all traits, the single-species mixing model 95% confidence interval captured 28 out  
402 of the 64 measured traits (44%), while the pairwise species mixing model captured 50 out of 64 measurements  
403 (78%), which indicates that the pairwise model was significantly better at predicting trait observations ( $p=5e-$   
404  $5$ , Fisher’s exact test,  $n=64$ ). For individual traits, the two models performed similarly in predicting daily  
405 fecundity (single-species predicted 14 of 16 experiments; pairwise species predicted 15 of 16;  $p=1$ , Fisher’s  
406 exact test,  $n=16$ ) and time to death (single-species predicted 9 of 16 experiments; pairwise species predicted  
407 9 of 16;  $p=1$ , Fisher’s exact test,  $n=16$ ), but the pairwise model outperformed the single species model  
408 in predicting development time (single-species predicted 4 of 16 experiments; pairwise species predicted 15  
409 of 16;  $p=8e-5$ , Fisher’s exact test,  $n=16$ ) and bacterial load (single-species predicted 1 of 16 experiments;  
410 pairwise species predicted 11 of 16;  $p=3e-4$ , Fisher’s exact test,  $n=16$ ).

## 411 9.4 Comparison of single-species and pairwise mixing model errors

412 We found that for the experiments of diversity 3, 4, and 5, the pairwise model predicts the average error of the  
413 daily fecundity to be .322 eggs (SE=.027 eggs), time to death to be 2.587 days (SE=.141 days), development  
414 time to be .140 days (SE=0.012 days), and bacterial load to be 123409 CFUs (SE=13646 CFUs). The  
415 single-species mixing model predicts average errors of the daily fecundity to be .436 eggs (SE=.304 eggs),  
416 time to death to be 3.396 days (SE=1.956 days), development time to be .488 days (SE=0.154 days), and  
417 bacterial load to be 322118 CFUs (SE=102579 CFUs). Therefore, we found that the pairwise averaging  
418 model better captured the measured traits than the single-species model (daily fecundity  $p=.149$ , time to  
419 death  $p=.120$ , development time  $p=4e-8$ , bacterial load  $p=1e-6$ ; Welch’s t-test,  $n=16$ ).

## 9.5 Coefficient of variation of traits at increasing diversity

Finally, we examined how the variation in traits changes at increasing diversities. We found that the standard errors of the daily fecundity and bacterial load are significantly positively correlated with increasing diversity (fecundity  $p=0.01$ , bacterial load  $p=3e-3$ , Wald test) and the standard error of time to death is significantly negatively correlated with increasing diversity ( $p=0.01$ , Wald test).

The coefficient of variation of the net bacterial load had a significant negative correlation with increasing diversity ( $p=0.02$ , Wald test), as indicated in Figures S15 and S16. However, the coefficient of variation of the individual species CFU counts is relatively constant over increasing diversity, as shown in Figure S15. This indicates that the composition of higher-diversity microbiomes consists of bacterial species that are less variable, and this in turn suggests that higher-order interactions serve a stabilizing role for the microbiome.

## 10 Pairwise species interactions (Figure 6)

Each of the 32 fully combinatorial experiments has 24 biological replicates, and for each biological replicate we collected the CFU abundance data by averaging three technical replicates. The raw data are displayed in Figure S6. We segmented this collection of CFU counts according to its bacterial diversity (ranging from 1 to 5), and studied how microbiome properties changed for different diversities. For a given bacterial combination, not all of the introduced bacteria were detected in every replicate, due to the limit of detection of our method. In the following measurements, we exclude replicates in which one or more species was undetected. By excluding these replicates, we intend to capture the deterministic aspect of interactions between bacteria, rather than the stochastic aspect that corresponds to the variability in colonization. However, this exclusion also reduces the available samples for analysis—in the most extreme case only 4 biological replicates remained (Figure S15D,E).

We computed the interaction strength between pairs of bacteria following Paine’s method [10] and measured the asymmetry of these interactions. We also used a generalized Lotka-Volterra model to fit bacterial interactions from the CFU data, and found that the inferred interactions qualitatively matched those derived from Paine’s method. Lastly, we calculated correlations between pairs of bacteria.

### 10.1 Bacterial interactions determined by Paine’s method (Figure 6B,C, S15A,B)

Paine [10] presented a model-free calculation of interaction strength, which we implemented to probe bacterial interaction strength at low diversity (1 and 2 species) and high diversity (4 and 5 species). Note that this method for 3 and 4 species diversity is less-straightforward to implement and is omitted here for simplicity. Let  $(y^{+j})_i$  and  $(y^{-j})_i$  be the abundance of species  $i$  in the presence and in the absence of the  $j$  community. Then, to measure the effect of a single species  $j$  on another species  $i$ , Paine measured [10]

$$\frac{(y^{+j})_i - (y^{-j})_i}{(y^{-j})_i}. \quad (9)$$

This value is bounded below by -1 (introduction of  $j$  eliminates  $i$ ), negative values indicate  $i$  is inhibited by  $j$ , and positive values indicate  $i$  is increased by  $j$ . We consider a rescaling of this value that has a symmetric range, which we call  $M_{ij}$ , that is given by

$$M_{ij} = \log_2 \left( 1 + \frac{(y^{+j})_i - (y^{-j})_i}{(y^{-j})_i} \right). \quad (10)$$

We compute this value at low ( $1 \rightarrow 2$ ) and at high ( $4 \rightarrow 5$ ) diversities, where we define the diversity of an experiment as the number of bacterial species that are in the food. For example, to compute  $M_{12}$  at low diversities, we consider experiments 10000 and 11000; to compute  $M_{12}$  at high diversities we consider experiments 10111 and 11111. Since there are many biological replicates for each experiment, we can bootstrap our samples following the method of Efron and Tibshirani [14] in order to compute the mean and standard error for each interaction value  $M_{ij}$ . We use the mean interaction values to populate the interaction matrix  $M$ , which we display as a directed graph in the low (Figure 6B) and high (Figure 6C) diversity cases. In the tables below, we also report the standard deviation of the distribution for each interaction (that



462 is, we show the mean( $M_{ij}$ )  $\pm$  standard error( $M_{ij}$ ). The interaction matrices for high and low diversity  
 463 interactions are

$$M^{\text{high}} = \begin{pmatrix} 0.00 \pm 0.00 & -0.02 \pm 0.53 & -0.03 \pm 0.58 & -0.56 \pm 0.50 & -0.72 \pm 0.50 \\ -2.48 \pm 0.88 & 0.00 \pm 0.00 & -0.37 \pm 1.08 & -1.59 \pm 0.98 & -0.42 \pm 1.13 \\ -0.93 \pm 0.81 & 0.10 \pm 0.61 & 0.00 \pm 0.00 & -0.44 \pm 0.70 & -1.98 \pm 0.94 \\ -0.68 \pm 0.75 & 0.12 \pm 0.84 & -0.41 \pm 0.78 & 0.00 \pm 0.00 & -0.36 \pm 1.00 \\ -0.14 \pm 0.63 & 0.91 \pm 0.91 & -0.18 \pm 0.70 & -0.38 \pm 0.64 & 0.00 \pm 0.00 \end{pmatrix} \quad (11)$$

464 and

$$M^{\text{low}} = \begin{pmatrix} 0.00 \pm 0.00 & 0.59 \pm 0.45 & 1.23 \pm 0.41 & 0.69 \pm 0.47 & 0.93 \pm 0.40 \\ -1.14 \pm 0.54 & 0.00 \pm 0.00 & -0.51 \pm 0.51 & 0.06 \pm 0.33 & 0.19 \pm 0.36 \\ 1.09 \pm 0.69 & 1.00 \pm 0.65 & 0.00 \pm 0.00 & -0.28 \pm 0.74 & -0.56 \pm 0.63 \\ -0.37 \pm 0.62 & 0.24 \pm 0.62 & 0.51 \pm 0.84 & 0.00 \pm 0.00 & 0.13 \pm 0.51 \\ 0.14 \pm 0.27 & 0.08 \pm 0.30 & 0.28 \pm 0.39 & 0.34 \pm 0.33 & 0.00 \pm 0.00 \end{pmatrix}. \quad (12)$$

465 The interactions as defined in Eq. (10) need not be—and generally are not—symmetric. We compute  
 466 their asymmetry with a metric used by Bascompte et al. [13],

$$AS(i, j) = \frac{|M_{ij} - M_{ji}|}{\max(|M_{ij}|, |M_{ji}|)}. \quad (13)$$

467 This metric ranges from 0 (perfectly symmetric) to 2 (exact opposites). We consider the mean asymmetry of  
 468 all 10 pairs. For the low diversity case this mean asymmetry is 1.04 (SD = 0.13), and for the high diversity  
 469 case this mean asymmetry is 0.77 (SD = 0.08). To estimate the standard deviation, we repeatedly permuted  
 470 the underlying interaction matrix  $M$  and created a distribution of permuted mean asymmetry values and  
 471 used that standard deviation.

## 472 10.2 Bacterial interactions fit by a generalized Lotka-Volterra model (Figure 473 S15D,E)

474 We infer the species interactions by assuming that the system obeys the generalized Lotka-Volterra equations,  
 475

$$\frac{d}{dt}x_i = x_i \left( \mu_i + \sum_{j=1}^N M_{ij}x_j \right) + \sum_i^T \delta(t - t_i^*)v_i, \quad (14)$$

476 with growth rate  $\mu$ , interaction matrix  $M$ , and pulsed "feeding" of  $v_i$  at times  $t_1^*, \dots, t_T^*$ .

477 Previous experiments have shown that when exposed to a steady supply of bacteria-infused food the fly  
 478 gut approaches equilibrium within 5 days [3], and in this experiment the flies have been feeding for 10 days  
 479 (see Materials and Methods). Therefore, we assume that the CFU counts of each experiment are measured  
 480 at equilibrium, and we assume that the median of each combination's CFU counts is the steady state solution  
 481 to Eq. (14). We additionally assume that the microbiome returns to equilibrium quickly after feeding, so  
 482 that we may neglect the  $\delta(t - t_i^*)v_i$  term in Eq. (14).

483 At equilibrium, the time derivative on the left hand side vanishes, and we assume that the steady state  
 484 is non-trivial (i.e.  $x_i \neq 0$ ). If we call the steady state of each microbe for a given experiment  $\tilde{x}_i$ , then an  
 485 experiment of diversity  $N$  will correspond to  $N$  algebraic equations of the form

$$0 = \mu_i + \sum_{j=1}^N M_{ij}\tilde{x}_j. \quad (15)$$

486 If there are  $m_i$  experiments of diversity  $i$ , then there are  $\sum_{i \in D} m_i i$  equations that must be simultaneously  
 487 satisfied for diversities  $D$ . To match the previous interaction calculations, we consider a low-diversity group  
 488  $D_{\text{low}} = \{1, 2\}$  and a high-diversity group  $D_{\text{high}} = \{3, 4, 5\}$ , which separates low-order interactions (2-  
 489 species) from high-order (3-, 4-, and 5-species). For each group, we can rewrite the linear equations of

Eq. (15) in matrix form as  $0 = A\vec{y}$ , where  $A$  is made up of the  $\tilde{x}_i$  and is of the form

$$A = \begin{pmatrix} \tilde{x}_1^{10000} & 0 & \cdots & 0 & 0 & \cdots & 1 & 0 & 0 & 0 & 0 \\ 0 & 0 & \cdots & 0 & \tilde{x}_2^{01000} & \cdots & 0 & 1 & 0 & 0 & 0 \\ \vdots & \vdots \\ \tilde{x}_1^{11000} & \tilde{x}_2^{11000} & \cdots & 0 & 0 & \cdots & 1 & 0 & 0 & 0 & 0 \\ 0 & 0 & \cdots & \tilde{x}_1^{11000} & \tilde{x}_2^{11000} & \cdots & 0 & 1 & 0 & 0 & 0 \\ \vdots & \vdots \end{pmatrix} \quad (16)$$

and  $\vec{y} = [M_{11}, M_{12}, \dots, M_{21}, M_{22}, \dots, M_{55}, \mu_1, \dots, \mu_5]^T$ . We assume  $\mu_i = 1$  to obtain a nonzero result for  $M$ , which effectively absorbs the growth rates  $\mu_i$  into the interaction values  $M_{ij}$  (so that we are always solving for  $M_{ij}/\mu_i$ ). We solve this system of equations for  $\vec{y}$  with linear least-squares. The solution to this least-squares problem is the interaction matrix  $M$ , which we plot as a food web in Figure S15D,E.

We tested our inference of the interaction matrix by considering how close the steady states of  $M$  were to the experimentally measured medians. At steady state, each combination  $C$  corresponds to a set of  $|C|$  linear equations, as in Eq. (14), which we write as

$$M_C \vec{x}_C = -\vec{I}_C, \quad (17)$$

where  $M_C$  a subset of  $M$  pertaining to the bacteria in  $C$ , and  $\vec{I}_C$  is a vector of ones of length  $|C|$ . For example, for a combination  $C = \{1, 3\}$ , we have

$$\begin{aligned} M_{11}x_1 + M_{13}x_3 &= -1 \\ M_{31}x_1 + M_{33}x_3 &= -1. \end{aligned} \quad (18)$$

Therefore, we can solve for the steady state of each combination  $\vec{x}_C$  as

$$\vec{x}_C = -M_C^{-1}\vec{I}_C. \quad (19)$$

We compare this predicted steady state  $\vec{x}_C$  with the experimentally measured steady state  $\vec{x}_C^{\text{exp}}$  over all combinations by considering the error

$$\varepsilon := \frac{|\Delta \text{ SS CFUs}|}{|\text{SS CFUs}|} = \frac{\sqrt{\sum_{C \in \{0,1\}^5} (\vec{x}_C - \vec{x}_C^{\text{exp}})^2}}{\sqrt{\sum_{C \in \{0,1\}^5} (\vec{x}_C^{\text{exp}})^2}}. \quad (20)$$

The interaction matrix  $M$  we fit with the least-squares method has an error  $\varepsilon$  of 0.322.

We construct a distribution for  $\varepsilon$  by permuting the entries of  $M$  many times, and for each permutation calculating the error  $\varepsilon$ . From this, we find that the error from the unpermuted interaction matrix  $M$  ( $\varepsilon = 0.322$ ) is generally smaller than the permuted matrix errors (median = 5.69, standard deviation = 3.47). Therefore, our least-squares fitting method constructs an interaction matrix that reflects the experimental median CFU counts better than permuted alternatives ( $p = 0.01$ , comparison with errors of 10000 randomly permuted interaction matrices).

### 10.3 Prediction of high-diversity bacterial abundances from low-diversity data

Next, we use the gLV model parameterized on low-diversity (1 and 2-species) combinations of bacteria to predict the CFU abundances of high-diversity (3, 4, and 5-species) experiments. We compare these predictions to a simple mean-field model parameterized on the low-diversity experimental data. This mean-field model is ignorant of any microbial interactions, and for a given high-diversity bacterial combination, predicts that the bacteria have abundances equal to their ‘‘mean abundance’’ in the low-diversity experimental data, where a bacterias mean abundance is its average CFU count over all of the low-diversity trials in which it was present.

Then, to attain the gLV model CFU predictions, we simulate the gLV equations for each of the 16 high-diversity combinations. Since the eigenvalues of the low-diversity interaction matrix  $M$  are all negative,

520 each of these simulations will attain a unique steady state irrespective of initial condition. For convenience,  
521 we start each simulation with an initial condition equal to the mean-field models prediction. After this  
522 process, we have predictions for the CFU counts for each high-diversity experiment for both the gLV and the  
523 mean-field models. After comparing these predictions to the median of the true experimental CFU counts,  
524 we find that the mean-squared error of the mean-field model was more accurate for 9 combinations, and the  
525 gLV model was more accurate for 7 combinations. Applying the binomial test yields that the gLV model  
526 parameterized on low-diversity data is not significantly predictive of high-diversity bacterial abundances  
527 ( $p=0.803$ ,  $n=16$ ).

## 528 10.4 Pairwise correlations (Figure 6A)

529 For the set of experiments that have a given diversity  $N$ , we compute the pairwise correlation between  
530 bacteria  $i$  and  $j$  in the following way. For the set of experiments of diversity  $N$  that contain microbes  $i$  and  
531  $j$ , the sample CFU counts for  $i$  and  $j$  for each experiment are aggregated. Then, we calculate the Spearman's  
532 rank correlation coefficient of these pairs of data, and arrive at a pairwise correlation value between species  
533  $i$  and  $j$  that is between -1 (ordinal CFU counts between the species are perfectly anticorrelated) and 1  
534 (perfectly correlated). This process is repeated for each species pairing to build a pairwise correlation matrix  
535 for each diversity.

## 536 10.5 Determining statistical trends

537 We first examined whether the interaction values determined with Paine's method became more negative  
538 at higher diversities. The quantity  $M_{ij}^{\text{high}} - M_{ij}^{\text{low}}$  (where each  $M_{ij}$  is the mean of the bootstrapped  
539 distribution, as described above) is negative for 18 out of 20 entries. We compare this to the null hypothesis  
540 that the interaction values are unchanged, which would predict 10 out of 20 to be negative. Therefore,  
541 we found that interactions became more negative at higher diversities (binomial test,  $p = 2e-4$ ).

542 Next, we studied how pairwise correlations change at increasing diversity. To achieve this, we compare the  
543 same matrix element across different diversities using the non-parametric Kendall rank correlation coefficient.  
544 Each matrix element is ranked according to its size over increasing diversities, resulting in an ordinal vector of  
545 length 4. Through the Kendall rank correlation coefficient, the ranking for each matrix element is compared  
546 to the strictly increasing vector [1, 2, 3, 4], resulting in a  $\tau$  coefficient that is between -1 and 1. For the  
547 correlation matrices there are 10 such  $\tau$  coefficients with a mean of -0.4 (corresponding to all possible pairings  
548 of 5 bacteria). The matrices becoming more negative at higher diversities would correspond to negative  $\tau$   
549 coefficients. To determine whether the distribution of  $\tau$  coefficients is significantly more negative than a  
550 distribution centered at 0, we apply the Wilcoxon signed-rank test. The resulting one-sided  $p$ -value for  
551 the correlation matrices is 0.0323, indicating that there is a significant trend in the values of the correlation  
552 matrices to decrease. These results are robust to how we threshold CFU counts below the detection limit— if  
553 we assume that undetected species have an abundance of 1000 CFUs, corresponding to the limit of detection,  
554 the resulting one-sided  $p$ -value remains 0.0323.

# 555 11 Supplements

## 556 11.1 Data transformation

All the interactions we compute are based on and generalize the additive genetic epistasis formula  $u_{11} = w_{00} + w_{11} - w_{01} - w_{10}$ . This additive formula relates to the multiplicative formula  $m_{11} = w_{00}w_{11} - w_{01}w_{10}$  up to a logarithmic transformation. That is, composing the phenotype with a log transformation, we have:

$$\log(w_{00}) + \log(w_{11}) - \log(w_{01}) - \log(w_{10}) = \log(w_{00}w_{11}) - \log(w_{01}w_{10}).$$

557 To highlight that significant interactions we find do not depend on the additive approach we choose, we com-  
558 puted the same interactions as above also for the logarithmic (in base 2) transformation of the data. With  
559 no surprise, the interactions might dependent on the choice of the data transformation. More generally, we

560 conclude by observing that transformations (possibly) depend on the true distribution of the observed (measured) data. Since the true distribution of our measurement remains unknown, we find it more reasonable to present our findings based on the actual measured data.

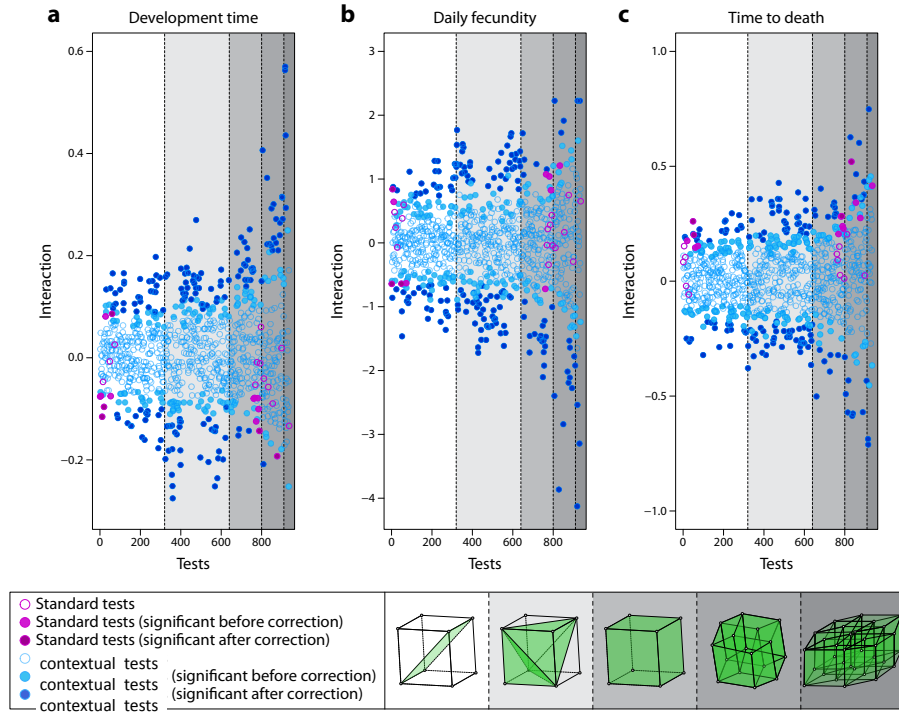

Figure 2: **Scatter plot of all tested interactions on  $\log_2$  transformed data** (standard in purple and **contextual** interactions in blue). Interactions for (a) development time, (b) daily fecundity, (c) time to death. Filled circles indicate significant interactions, open circles represent non-significant interactions. Dark blue and dark purple filled circles indicate significance ( $p < 0.05$ ) after multiple testing correction. Filled light blue and filled light purple dots indicate significance ( $p < 0.05$ ) before corrections.

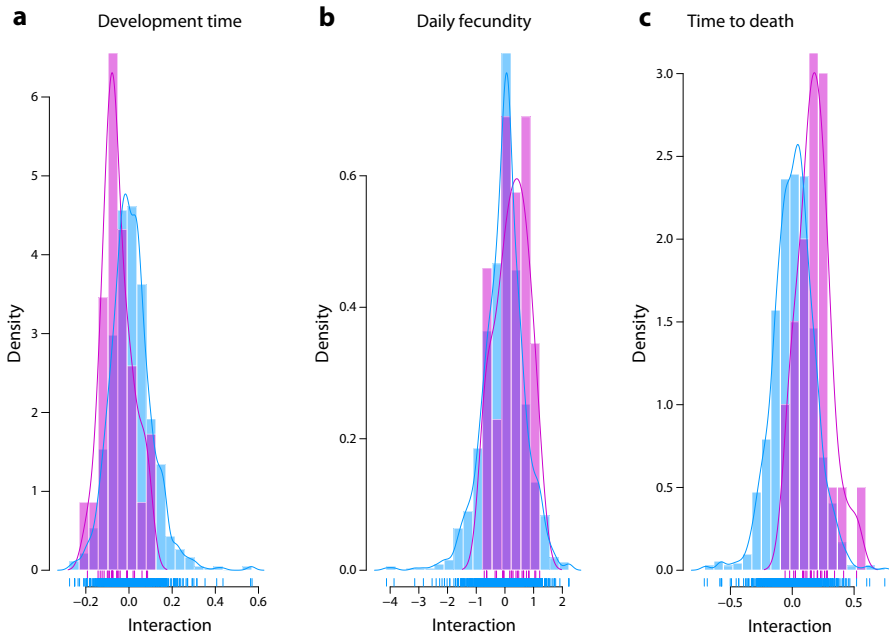

Figure 3: **Density plot of all tested interactions (standard in purple and contextual in blue) for the  $\log_2$  transformed data.** Interactions for (a) development time, (b) daily fecundity, (c) time to death.

## 563 11.2 Spurious epistasis in the microbiome

564 The invariance of significance under transformation effectively deals with the problem of spurious epistasis,  
 565 which was the subject of previous authors' work regarding genetic interactions (see [11]). In particular, Sailer  
 566 and Harms estimated the nonlinear scales of arbitrary genotype-phenotype maps and then linearize these  
 567 maps in order to remove the effects. Because the interactions we detect are invariant under transformation,  
 568 the removal of non-linearity (itself a transformation) cannot affect the outcome of our calculations. Further-  
 569 more, the spurious epistasis dealt with in [11] is so because it does not represent true genetic interactions.  
 570 However, none of the interactions that we seek to detect are genetic interactions – they are microbiome in-  
 571 teractions, which are the products of whole organism physiologies. We apply the present framework because  
 572 the simplest model is that these interactions should be additive (and many of them are). Any non-additivity  
 573 becomes a potentially interesting interaction, but the mechanisms of these interactions are not due to simple  
 574 inactivation of genes, and the rules by which such interactions occur are not understood. Thus, it is not  
 575 appropriate to address so-called 'spurious interactions' in the current work.

## 576 11.3 Simulated data

577 In Figures 4 and 5 we represent the results of the standard and contextual interactions analyzed in this paper  
 578 for data sampled from the standard normal distribution (on the left) and sampled uniformly at random from  
 579  $[0, 1]$  (on the right). Figures 4 and 5 can be used to determine difference between two types of random values  
 580 between 0 and 1 associated to the 32 bacterial combinations and the results obtained in Figure 4 (main  
 581 text) on the actual experimentally measured data. Here we do not include a study of significant interactions,  
 582 since these sampled data come without a sampled standard error value, being that the data themselves are  
 583 randomly generated.

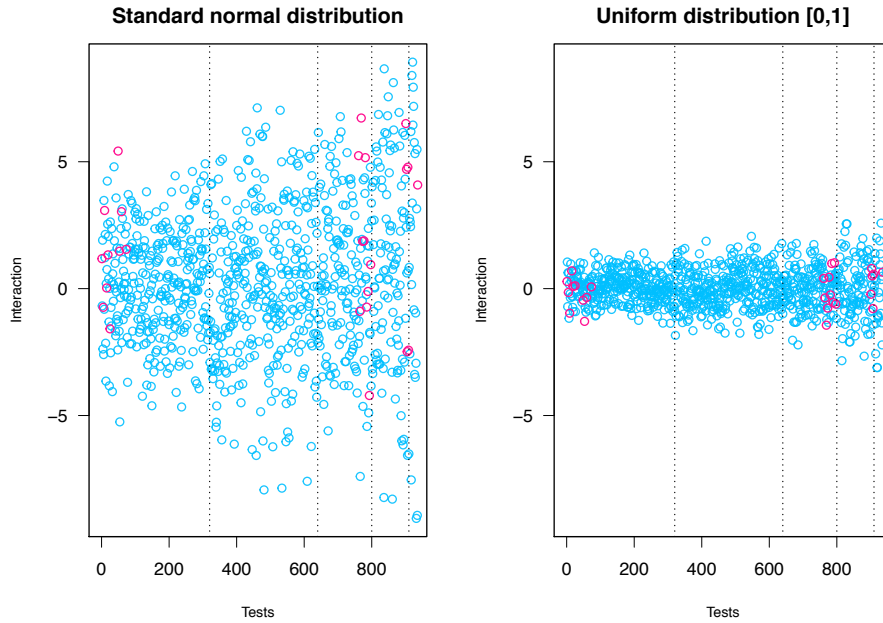

Figure 4: Scatter plot of all tested interactions on data sampled from the standard normal distribution and from the uniform distribution on  $[0, 1]$  (standard in purple and contextual interactions in blue).

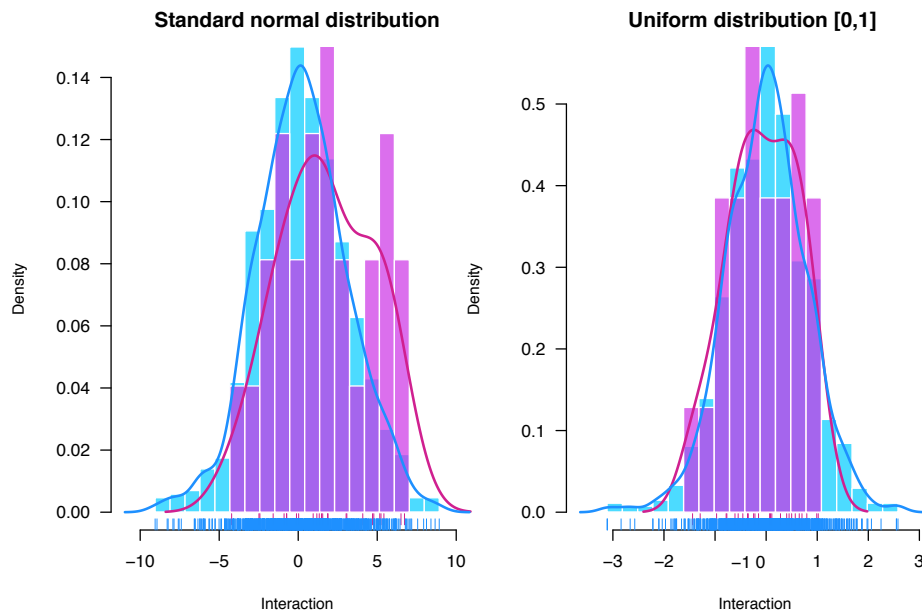

Figure 5: Density plot of all tested interactions on data sampled from the standard normal distribution and from the uniform distribution on  $[0, 1]$ .

## 584 References

- 585 [1] N. Beerenwinkel, L. Pachter, B. Sturmfels, SF. Elena and RE. Lenski, *Analysis of epistatic interactions*  
 586 *and fitness landscapes using a new geometric approach*, BMC Evolutionary Biology 2007:60 (2007)

- 587 [2] N. Beerenwinkel, L. Pachter, B. Sturmfels, *Epistasis and shapes of fitness landscapes* Statistica Sinica  
588 17, 1317-1342 (2007)
- 589 [3] B. Obadia, ZT. Guvener, V. Zhang, JA. Ceja-Navarro, EL. Brodie, WW. Ja, WB. Ludington, *Proba-  
590 bilistic Invasion Underlies Natural Gut Microbiome Stability*, Current Biology, 27, 1999-2014 (2017)
- 591 [4] H. S. M. Coxeter. *Regular Polytopes*, London, Methuen, New York, Pitman 1949. 20-321 (1948)
- 592 [5] J. A. De Loera, J. Rambau, F. Santos *Triangulations*, Algorithms and Computation in Mathematics,  
593 25, Structures for algorithms and applications, Springer-Verlag, Berlin, xiv+535 (2010)
- 594 [6] J. Grilli, G. Barabs, MJ. Michalska-Smith, S. Allesina, *Higher-order interactions stabilize dynamics in  
595 competitive network models*, Nature. Aug 10;548(7666):210-213. (2017)
- 596 [7] P. Huggins, B. Sturmfels, J. Yu, and DS. Yuster. *The Hyperdeterminant and Triangulations of the  
597 4-Cube*. Mathematics of Computation 77, no. 263 (2008)
- 598 [8] N. Korasidis, L. Lamberti, code available at <https://github.com/cbg-ethz/epistasis-formulas>
- 599 [9] P. D. Newell, A. E. Douglas, *Interspecies Interactions Determine the Impact of the Gut Microbiota on  
600 Nutrient Allocation in Drosophila melanogaster*, Appl. Environ. Microbiol, vol. 80 no. 2 788-796 (2014)
- 601 [10] R. T. Paine *Food-web analysis through field measurement of per capita interaction strength*, Nature  
602 355, 73-75 (1992)
- 603 [11] R. Sailer, M. Harms, *Detecting High-Order Epistasis in Nonlinear Genotype-Phenotype Maps*, Genetics,  
604 (2017)
- 605 [12] Weinreich, D. M., Lan, Y., Wylie, C. S., and Heckendorn, R. B. *Should evolutionary geneticists worry  
606 about higher-order epistasis?*, Current Opinion in Genetics and Development, 23(6), 700707 (2013)
- 607 [13] Bascompte, J., Jordano, P., and Olesen, J. M., *Asymmetric Coevolutionary Networks Facilitate Biodi-  
608 versity Maintenance*, Science 312.5772 (2006)
- 609 [14] Efron, B., Tibshirani, R., *Bootstrap Methods for Standard Errors, Confidence Intervals, and Other  
610 Measures of Statistical Accuracy*, Statistical Science, vol. 1 no. 1 54-75 (1986)
